# Supplementary material for: Exploring geographic variation in acute appendectomy in Ireland: results from a national registry study
Source: PubMed Central journal article supplement — BMJ Open. 2019 Aug 22;9(8):e025231. doi: 10.1136/bmjopen-2018-025231 (PMC6707658; doi:10.1136/bmjopen-2018-025231), 2019-08-22
Supplement: bmjopen-2018-025231.draft_revisions.pdf [file bmjopen-2018-025231.draft_revisions.pdf]

# BMJ Open

BMJ Open is committed to open peer review. As part of this commitment we make the peer review history of every article we publish publicly available.

When an article is published we post the peer reviewers' comments and the authors' responses online. We also post the versions of the paper that were used during peer review. These are the versions that the peer review comments apply to.

The versions of the paper that follow are the versions that were submitted during the peer review process. They are not the versions of record or the final published versions. They should not be cited or distributed as the published version of this manuscript.

BMJ Open is an open access journal and the full, final, typeset and author-corrected version of record of the manuscript is available on our site with no access controls, subscription charges or pay-per-view fees (<http://bmjopen.bmj.com>).

If you have any questions on BMJ Open's open peer review process please email [info.bmjopen@bmj.com](mailto:info.bmjopen@bmj.com)

# BMJ Open

## Exploring variation in acute appendectomy in Ireland

|                               |                                                                                                                                                                                                                           |
|-------------------------------|---------------------------------------------------------------------------------------------------------------------------------------------------------------------------------------------------------------------------|
| Journal:                      | <i>BMJ Open</i>                                                                                                                                                                                                           |
| Manuscript ID                 | bmjopen-2018-025231                                                                                                                                                                                                       |
| Article Type:                 | Research                                                                                                                                                                                                                  |
| Date Submitted by the Author: | 13-Jul-2018                                                                                                                                                                                                               |
| Complete List of Authors:     | Ahmed, O; Wexford General Hospital, General Surgery<br>Mealy, Ken; Wexford General Hospital, General and Colorectal Surgery<br>Sorensen, Jan ; Royal College of Surgeons Ireland, Health Outcomes<br>Research Centre      |
| Keywords:                     | Health policy < HEALTH SERVICES ADMINISTRATION & MANAGEMENT,<br>Organisation of health services < HEALTH SERVICES ADMINISTRATION &<br>MANAGEMENT, PUBLIC HEALTH, Paediatric surgery < SURGERY, Adult<br>surgery < SURGERY |
|                               |                                                                                                                                                                                                                           |

SCHOLARONE™  
Manuscripts

Peer Review Only

# Exploring geographic variation in acute appendectomy in Ireland

Authors:

Ola Ahmed, Ken Mealy, Jan Sorensen

1. Department of General Surgery, Wexford General Hospital, Wexford, Ireland  
Ms Ola Ahmed  
Trainee Surgeon
2. National Clinical Programme in Surgery, Royal College of Surgeons in Ireland, Dublin 2, Ireland; Department of General Surgery, Wexford General Hospital, Wexford, Ireland  
Mr Ken Mealy  
Consultant Surgeon
3. Healthcare Outcomes Research Centre, Royal College of Surgeons in Ireland, Dublin 2, Ireland  
Professor Jan Sorensen  
Director of the Healthcare Outcomes Research Centre

**Correspondence to:** Ms Ola Ahmed, Department of General Surgery, Wexford General Hospital, Wexford, Ireland

**Email:** [olasdahmed@gmail.com](mailto:olasdahmed@gmail.com)

**Word count:** 2159

### Strengths and limitations of this study

- The study employed a large, well-defined population of the Republic of Ireland.
- All data was age and gender standardised as is seen in other publications analysing geographical variation in healthcare, including the Dartmouth Atlas Project.
- The study does not include data from public institutions, however acute appendicitis is largely managed in public hospitals regardless of medical insurance cover.
- Co-morbidities, procedural complexity and socioeconomic status were also not controlled for when assessing patient characteristics.
- Future studies should expand on this study design and additional examination of regional and local variations perhaps in a risk adjusted setting should be a priority.

**Abstract**

**Objective** To explore geographic variations in Irish laparoscopic and open appendectomy procedures.

**Design** Analysis based on 2014-2017 administrative hospital data from public hospitals.

**Setting** Counties of the Republic of Ireland.

**Participants** Irish residents with a hospital admission for an appendectomy as the principle procedure.

**Main outcome measures** Age and gender standardised laparoscopic and open appendectomy rates for 26 counties. Geographic variation measured with the extremal quotient (EQ), coefficient of variation (CV) and the systematic component of variation (SCV).

**Results** 24,522 appendectomies were included. 77.9% (n= 19,103) were performed laparoscopically. An 8-fold variation was seen for laparoscopy and an 11-fold variation for the open approach when the area with the highest and lowest rate were compared. An EQ of 1.1 for laparoscopy and 1.2 for open appendectomy was determined. A high CV was demonstrated with a value of 2.9 and 4.0 for laparoscopic and open appendectomy across counties. A SCV of 14.5% and 113.6% for laparoscopic and open appendectomy was observed. A wider variation was determined when children and adults were assessed separately.

**Conclusions** The geographic distribution in the utility of appendectomy varies considerably across Irish counties. Our data suggests that a patient's likelihood of undergoing a laparoscopic or open appendectomy may be associated with their county of residence.

## Introduction

Acute appendicitis continues to be a global disease with escalating incidence rates in rapidly developing and industrialised countries<sup>1</sup>. These epidemiological associations contribute to the growing knowledge on the pathogenesis of acute appendicitis and the influences of environmental triggers<sup>2,3</sup>. Modern advances in laparoscopic surgery over the past two decades have led to the demonstrable advantage of laparoscopic appendectomy over open techniques across all populations<sup>4-6</sup>. Laparoscopy is associated with shorter hospital length of stay, decreased analgesic requirements, and lower morbidity rates in comparison with open surgery<sup>4,7,8</sup>. However, while laparoscopic approaches are preferred in most instances, open appendectomy is still practiced in cases where laparoscopy is difficult or contraindicated.

Reasons for the regional variability of laparoscopic and open appendectomy are still unclear. The observed rates of open appendectomy vary widely in the literature from 6 – 35% with higher variation in the adult population<sup>9-11</sup>. Recent studies of geographic variation appear to demonstrate that a patient's likelihood of undergoing specific surgical procedures depends greatly on where they live<sup>12</sup>. The Dartmouth Atlas Project has shown wide variations of up to 10-fold for a multitude of surgical procedures across geographical areas<sup>13</sup>. Analysing regional variations in the provision of common procedures helps raise questions relating to service provision as well as identify opportunities for improving efficiency and observing best practice. The aim of this study was to investigate the geographic variation in the surgical management of acute appendicitis in the Republic of Ireland using administrative data from public hospitals. We compare the national data of laparoscopic and open appendectomy for children and adults. By analysing and comparing the patterns of utilisation in these two populations, we seek to understand the extent that area of residence may influence the likelihood of treatment with either a laparoscopic or open procedure.

## Methods

### Data extraction

Anonymised patient data were obtained for a 4-year period from 2014 to 2017 from the National Quality Assurance and Improvement System (NQAIS). NQAIS is an online application based on the Hospital Inpatient Enquiry system (HIPE) operated by the national Health Service Executive in Ireland. Established in 1971, HIPE collects clinical and administrative data on discharges from acute Irish public hospitals. A HIPE record is created following a patient's discharge from hospital and offers demographic and clinical information for the episode of care. We extracted records of all hospital episodes coded with laparoscopic appendectomy or open appendectomy as the primary procedure. From this sample we excluded episodes with primary diagnostic codes different from "Appendicitis", "Suspected appendicitis", or "Rule-out appendicitis" (codes K35-37 in the International Classification of Diseases Version 10 Clinical Modification (ICD-10-CM)), episodes coded as non-emergency admissions, and episodes for patients who are not residents in Ireland. Patients treated in private institutions were also not included in the study.

Patient factors considered in the analysis were age, gender, county of residence, length of stay and readmissions after 7 and 30 days. Children were categorized as patients aged 14 years or younger to correspond with the 5-year age groups in the available census data. National age and gender stratification was derived from the population of 4,761,865 referred to in the 2016-population census<sup>14</sup>.

## Statistical analysis

Data was analysed using Stata version 15.1 (StataCorp, Texas). Descriptive statistics were recorded for patient characteristics and procedure type. Continuous variables were compared using unpaired t-tests. Association of categorical variables (differences for dichotomous variables between groups) was assessed using the chi-square ( $\chi^2$ ) test. Continuous numerical variables were reported as means and standard deviations (SD). Categorical variables were reported as proportions.

To assess relative variability we used methods described by McPhearson and colleagues<sup>15</sup>. The extremal quotient (EQ) is presented as the ratio of the highest and lowest county rate. A value close to 1 indicates low variation in rates across counties. The coefficient of variation (CV) is a measure of relative variability and is calculated as the standard deviation of the county rates divided by the mean of county rates. A large score indicates large variability. The systematic component of variation (SCV) is also a measure of variation. This is the difference between the random component of variation and the total variation and by convention is reported as a percentage. A SCV value greater than 5 indicates large systematic and regional variation<sup>15</sup>. We estimated these variability measures for the whole population and for children and adults separately.

## Patient involvement

No patients were involved in setting the research question or the outcome measures, nor were they involved in the developing design or implementation of the study. No patients were asked to advise on interpretation or writing up of results.



## Results

### National analysis

A total of 26,760 episodes of care discharged through January 1<sup>st</sup> 2014 to December 31<sup>st</sup> 2017 were extracted. In this sample 2,260 episodes were coded with diagnoses other than K35-K37; 583 episodes were coded as non-emergency admissions, and 331 episodes related to non-Ireland residents. After exclusion of these episodes, our study sample included 23,684 episodes of care of which 77.6% were laparoscopic appendectomy and 22.4% were open appendectomy. 53.7% of patients were male and the mean age was 25 years (SD 15, range 0-98, median 20).

The proportion of laparoscopic procedures was 59.0% among children and 89.4% among adults (statistically significant difference; chi-squared  $p < 0.01$ ). Figure 1 displays the proportion of appendectomies conducted as laparoscopic procedures for 2014 to 2017 in children and adult patients. Girls were more likely to have laparoscopic procedures than boys (64.6% vs 54.6%, chi-squared  $p < 0.01$ ), and women more likely than men (91.5% vs 87.5%, chi-squared  $p < 0.01$ ). A clear age gradient was observed for the whole population and for men and women separately (trend  $p < 0.01$ ). The proportion of patients undergoing laparoscopic procedures reduced for older patients (logistic regression  $p < 0.01$ ) and appears statistically lower for patients older than 45 years ( $p < 0.01$ ). The proportion of laparoscopic procedures increased steadily during the studied years from 2014 to 2017 from 72.7% to 83.3% (trend  $p < 0.01$ ). For children the proportion increased from 51.9% to 66.9%.

Figure 2 displays the number of laparoscopic and open procedures performed on children and adults during the years 2014 to 2017 by county of residency.

The average length of stay for children was 3.0 days, and children with laparoscopic procedures had significantly shorter hospital lengths of stay (0.2 days, t-test  $p < 0.01$ ). The difference for adult patients was larger (3.0 vs 5.0 days, t-test  $p < 0.01$ ) and had a positive age gradient ( $p < 0.01$ ). No

1  
2  
3 statistical significant difference in average length of stay could be observed over the four years for  
4  
5 either children or adults.

6  
7 The rate of 7 and 30 days readmission was lower for patients treated with laparoscopic procedures  
8  
9 compared to open appendectomy (7-day readmissions: 2.9% vs 3.9%, chi-squared  $p < 0.01$ ) (30-day  
10  
11 readmissions: 5.4% vs 6.9%, chi-squared  $p < 0.01$ ). However, the difference was statistically  
12  
13 insignificant (but with the same direction) for children and significantly larger for adults (2.8% vs  
14  
15 5.2% chi-squared  $p < 0.01$ ; 5.3% vs 7.9%  $p < 0.01$ ). No differences in yearly readmission rates could be  
16  
17 observed over the four years.  
18  
19

### 20 21 **County analysis**

22 The annual appendectomy rate was estimated at 124.3 procedures per 100,000 persons and 96.5  
23  
24 and 27.8 for laparoscopic and open approaches respectively. Figure 3 demonstrates the gender  
25  
26 stratified national annual appendectomy rates per 100,000 persons by 5-year age groups. Online  
27  
28 supplementary table 1 shows the proportion of laparoscopic appendectomies per year by county of  
29  
30 residence for child and adult population.  
31  
32  
33  
34  
35  
36  
37  
38  
39  
40  
41  
42  
43  
44  
45  
46  
47  
48  
49  
50  
51  
52  
53  
54  
55  
56  
57  
58  
59  
60

Table 1

| Rate of laparoscopic procedures |          |      |      |      |        |      |      |       |
|---------------------------------|----------|------|------|------|--------|------|------|-------|
|                                 | Children |      |      |      | Adults |      |      |       |
| County                          | 2014     | 2015 | 2016 | 2017 | 2014   | 2015 | 2016 | 2017  |
| Carlow                          | 0.74     | 0.91 | 0.84 | 0.90 | 0.90   | 0.98 | 0.96 | 1.0   |
| Cavan                           | 0.11     | 0.14 | 0.08 | 0.13 | 0.22   | 0.51 | 0.44 | 0.5   |
| Clare                           | 0.56     | 0.43 | 0.59 | 0.65 | 0.90   | 0.94 | 0.88 | 0.97  |
| Cork                            | 0.65     | 0.76 | 0.8  | 0.87 | 0.93   | 0.96 | 0.97 | 0.95  |
| Donegal                         | 0.25     | 0.46 | 0.77 | 0.89 | 0.54   | 0.73 | 0.78 | 0.86  |
| Dublin                          | 0.44     | 0.42 | 0.54 | 0.64 | 0.93   | 0.96 | 0.96 | 0.96  |
| Galway                          | 0.39     | 0.41 | 0.38 | 0.47 | 0.86   | 0.89 | 0.89 | 0.90  |
| Kerry                           | 0.46     | 0.66 | 0.71 | 0.60 | 0.80   | 0.85 | 0.92 | 0.90  |
| Kildare                         | 0.49     | 0.62 | 0.64 | 0.56 | 0.97   | 0.97 | 0.98 | 0.98  |
| Kilkenny                        | 0.75     | 0.84 | 0.82 | 0.89 | 0.89   | 0.93 | 0.95 | 0.99  |
| Laois                           | 0.47     | 0.45 | 0.64 | 0.81 | 0.80   | 0.78 | 0.79 | 0.96  |
| Leitrim                         | 0.14     | 0.27 | 0.11 | 0.22 | 0.27   | 0.15 | 0.33 | 0.46  |
| Limerick                        | 0.44     | 0.50 | 0.54 | 0.70 | 0.89   | 0.93 | 0.90 | 0.95  |
| Longford                        | 0.70     | 0.97 | 0.90 | 0.93 | 0.90   | 0.93 | 0.92 | 0.92  |
| Louth                           | 0.66     | 0.61 | 0.78 | 0.77 | 0.96   | 0.97 | 0.93 | 0.96  |
| Mayo                            | 0.73     | 0.83 | 0.78 | 0.79 | 0.94   | 0.94 | 0.98 | 0.94  |
| Meath                           | 0.59     | 0.61 | 0.74 | 0.75 | 0.89   | 0.91 | 0.94 | 0.93  |
| Monaghan                        | 0.35     | 0.30 | 0.33 | 0.41 | 0.59   | 0.51 | 0.77 | 0.51  |
| Offaly                          | 0.65     | 0.78 | 0.83 | 0.78 | 0.94   | 0.98 | 1.00 | 0.95  |
| Roscommon                       | 0.42     | 0.39 | 0.50 | 0.47 | 0.69   | 0.68 | 0.75 | 0.865 |
| Sligo                           | 0.12     | 0.1  | 0.09 | 0.19 | 0.18   | 0.19 | 0.20 | 0.19  |
| Tipperary                       | 0.63     | 0.68 | 0.60 | 0.60 | 0.94   | 0.98 | 0.98 | 0.98  |
| Waterford                       | 0.75     | 0.80 | 0.77 | 0.74 | 0.92   | 0.94 | 0.98 | 0.96  |
| Westmeath                       | 0.86     | 0.84 | 0.92 | 0.92 | 0.89   | 0.96 | 0.96 | 0.97  |
| Wexford                         | 0.25     | 0.19 | 0.53 | 0.52 | 0.68   | 0.67 | 0.82 | 0.93  |
| Wicklow                         | 0.67     | 0.61 | 0.50 | 0.40 | 0.98   | 0.90 | 0.94 | 0.97  |

1  
2  
3 Figure 4 shows the ratio of observed and expected number of appendectomies in different counties  
4 for children and adults. The expected number of procedures was estimated by relating the national  
5 age and gender procedure rate to the county population. The ratio takes a value larger than one  
6  
7 when the numbers of observed procedures are higher than the expected number of procedures.  
8  
9

10  
11 Figure 5 presents the association between the ratio of observed and expected procedures for  
12 children and adults. Counties in the North-East quadrant have higher than expected number of  
13 procedures for both children and adults. Counties in the South-West quadrant have lower than  
14 expected number of procedures for both children and adults. There appears to be a strong  
15 association between the ratio for children and adults indicating that counties with a higher than  
16 expected ratio for children also have a higher ratio for adults. Only four counties have a different  
17 pattern. Roscommon is the only county where children have more than the expected episodes of  
18 care and adults have fewer than the expected episodes of care, while the reverse appears for  
19 Kilkenny, Waterford, Donegal and Kildare.  
20  
21  
22  
23  
24  
25  
26  
27  
28  
29  
30

31 Figure 6 displays the ratio of observed and expected procedures for laparoscopic and open  
32 procedures for children and adults separately.  
33  
34  
35

36 Table 2 reports the measures of variation for the whole population and children and adults  
37 separately (available as online supplementary table). The extremal quotient was 1.1 for laparoscopic  
38 and 1.2 for open appendectomy. The coefficient of variation was high for both laparoscopic and  
39 open appendectomy; 2.9 for laparoscopy and 4 for open procedures, in accordance with the  
40 McPhearson calculations. The systematic component of variation was also high for both procedures;  
41 14.5% for laparoscopy and 113.6% for open appendectomy.  
42  
43  
44  
45  
46  
47  
48  
49  
50  
51  
52  
53  
54  
55  
56  
57  
58  
59  
60

Table 2

| <b>Whole Population</b> |                    |             |                 |
|-------------------------|--------------------|-------------|-----------------|
|                         | <b>Laparoscopy</b> | <b>Open</b> | <b>Combined</b> |
| <b>EQ</b>               | 1.14               | 1.19        | 1.23            |
| <b>CV%</b>              | 3.29               | 4.37        | 3.09            |
| <b>SCV</b>              | 14.09              | 119.61      | 5.40            |
| <b>Children</b>         |                    |             |                 |
|                         | <b>Laparoscopy</b> | <b>Open</b> | <b>Combined</b> |
| <b>EQ</b>               | 1.1                | 1.06        | 1.08            |
| <b>CV%</b>              | 2.17               | 1.60        | 1.67            |
| <b>SCV</b>              | 37.88              | 36.40       | 8.39            |
| <b>Adult</b>            |                    |             |                 |
|                         | <b>Laparoscopy</b> | <b>Open</b> | <b>Combined</b> |
| <b>EQ</b>               | 1.19               | 1.11        | 1.18            |
| <b>CV%</b>              | 4.59               | 2.54        | 4.35            |
| <b>SCV</b>              | 9.91               | 500.49      | 4.42            |

## Discussion

This study documents a substantial geographic variation in the operative management of acute appendicitis in the Republic of Ireland. To our knowledge, there have been no population-based studies exploring emergency appendectomy variations at a county level in Ireland. While some level of disparity is to be expected, large variations particularly in emergency interventions can indicate potential inequity and inefficiency in the use of sophisticated healthcare and thus illustrate variations in access and use of surgical services. In keeping with the Dartmouth Atlas project, our data demonstrates that a person's likelihood of undergoing a laparoscopic or open appendectomy may be related to their county of residence<sup>13</sup>.

Laparoscopic appendectomy is favoured because of its benefits in analgesic requirements post-operatively, shorter length of hospital stay, lower post-operative mortality, and faster return to normal activities<sup>4, 7, 8, 16, 17</sup>. Unsurprisingly, most of the cases in our data were performed laparoscopically. Overall, an 8-fold variation exists for laparoscopic surgery while an 11-fold variation was seen for the open procedure. As with most observational data, causality cannot always be determined. Historical research suggests that the variations in the utility of surgical services may result from clinical uncertainty or heterogeneity in medical literature<sup>18, 19</sup>. One potential hypothetical and important reason for the demonstrated variations is individual surgeon skill and practice. The current study did not control for specific surgeon factors and may reflect a lack of laparoscopic skills in certain areas. Variations in laparoscopic surgery rates are not unheard of. An analyses by Doumouras et al suggested that laparoscopic training may influence the rate of laparoscopic practices in some hospitals<sup>20</sup>. While our study did not evaluate larger teaching hospitals separately, there may be an inherent geographic variation in laparoscopic expertise outside of tertiary referral centres and may also reflect variation in consultant and trainee surgeon performance as the principle operator; a factor not examined in this study.

In this study laparoscopy also appears lower in children and may reflect a deficiency in the paediatric surgery skillset available in the country and an unfamiliarity in operating on children amongst

1  
2  
3 general surgeons. Multiple reports have stressed the need to provide high quality paediatric surgery  
4 services to address the challenges and demands of paediatric patients which may be unavailable in  
5 hospitals where adult surgery appears to dominate. This would parallel with the reality that most  
6 district or general hospitals in Ireland lack a specialised paediatric surgeon on site and thus cases are  
7 performed by adult surgeons. Our study reports a 14-fold variation in paediatric laparoscopic  
8 appendectomy and an almost 6-fold variation in open surgery. These findings suggest a potential  
9 difference in expertise in relation to paediatric surgery in Ireland.  
10  
11  
12  
13  
14  
15  
16  
17

18 There are some limitations to this study. As with other studies including data from administrative  
19 databases, the reliability of results is based on the accuracy and completeness of systematic coding  
20 and data input. We attempt to overcome potential miscoding information by including a large  
21 population cohort of patients over a four-year period. We have not accounted for laparoscopic cases  
22 that were converted to open due to the potential inclusion of duplicate numbers and inherent  
23 miscoding errors. Co-morbidities, procedural complexity and socioeconomic status were also not  
24 controlled for when assessing patient characteristics. However, despite these limitations our findings  
25 demonstrate concerning conclusions relating to the provision of emergency appendectomy in the  
26 Republic of Ireland for the paediatric and adult population. The analysis provides some important  
27 implications for health care providers and surgeons in analysing the extent of geographic variation  
28 and the disparity in management of a common condition. While we cannot explain the wide  
29 variations seen, further analysis at an individual county level with the assessment of more in-depth  
30 patient characteristics may uncover opportunities to eliminate variations and ultimately improve  
31 delivery of care and patient outcomes. We also await the results of the multi-institutional Right Iliac  
32 Fossa Treatment (RIFT audit) study to further analyse the variation in management strategies of  
33 patients presenting with RIF pain to centres across the United Kingdom, Ireland, Italy, Portugal and  
34 Spain<sup>21</sup>.  
35  
36  
37  
38  
39  
40  
41  
42  
43  
44  
45  
46  
47  
48  
49  
50  
51  
52  
53  
54  
55  
56  
57  
58  
59  
60

1  
2  
3 **Contributors:** OA conceived and designed the study, analysed the data and drafted and revised the  
4 paper. JS designed the study, prepared and analysed the data, drafted and revised the paper. KM  
5 interpreted the results and revised the paper. All authors had full access to all the data (including  
6 statistical reports and tables) in the study and can take responsibility for the integrity of the data and  
7 the accuracy of the data analysis. OA is the guarantor and affirms that the manuscript is an honest,  
8 accurate, and transparent account of the study being reported; that no important aspects of the  
9 study have been omitted; and that any discrepancies from the study as originally planned (and, if  
10 relevant, registered) have been explained.  
11  
12  
13  
14  
15  
16  
17  
18

19  
20 **Funding:** This research received no specific grant from any funding agency in the public, commercial  
21 or not-for-profit sectors.  
22  
23  
24

25 **Competing interests:** All authors declare no conflicts in interests in the preparation of this study and  
26 declare: no support from any organisation for the submitted work; no financial relationships with  
27 any organisations that might have an interest in the submitted work in the previous three years; no  
28 other relationships or activities that could appear to have influenced the submitted work.  
29  
30  
31  
32  
33

34 **Ethical approval:** Ethics board approval was not required for the study.  
35  
36

37 **Data sharing:** All data has been included either in the main manuscript or as a supplementary file.  
38 The authors do not withhold any other data.  
39  
40  
41  
42  
43  
44  
45  
46  
47  
48  
49  
50  
51  
52  
53  
54  
55  
56  
57  
58  
59  
60



## References

1. Ferris M, Quan S, Kaplan BS, Molodecky N, Ball CG, Chernoff GW, Bhala N, Ghosh S, Dixon E, Ng S. The Global Incidence of Appendicitis: A Systematic Review of Population-based Studies. *Annals of surgery* 2017;**266**(2): 237-241.
2. Kaplan GG, Dixon E, Panaccione R, Fong A, Chen L, Szyszkowicz M, Wheeler A, MacLean A, Buie WD, Leung T. Effect of ambient air pollution on the incidence of appendicitis. *Canadian Medical Association Journal* 2009;**181**(9): 591-597.
3. Kaplan GG, Tanyingoh D, Dixon E, Johnson M, Wheeler AJ, Myers RP, Bertazon S, Saini V, Madsen K, Ghosh S. Ambient ozone concentrations and the risk of perforated and nonperforated appendicitis: a multicity case-crossover study. *Environmental health perspectives* 2013;**121**(8): 939.
4. Tate JJT, Dawson JW, Chung SCS, Lau WY, Li AKC. Laparoscopic versus open appendicectomy: prospective randomised trial. *The Lancet* 1993;**342**(8872): 633-637.
5. Southgate E, Vousden N, Karthikesalingam A, Markar SR, Black S, Zaidi A. Laparoscopic vs open appendectomy in older patients. *Archives of Surgery* 2012;**147**(6): 557-562.
6. Adwan H, Weerasuriya CK, Endleman P, Barnes A, Stewart L, Justin T. Laparoscopic versus open appendicectomy in children: A UK District General Hospital experience. *Journal of Pediatric Surgery* 2014;**49**(2): 277-279.
7. Thomson J-E, Kruger D, Jann-Kruger C, Kiss A, Omoshoro-Jones J, Luvhengo T, Brand M. Laparoscopic versus open surgery for complicated appendicitis: a randomized controlled trial to prove safety. *Surgical endoscopy* 2015;**29**(7): 2027-2032.
8. Tiwari MM, Reynoso JF, Tsang AW, Oleynikov D. Comparison of outcomes of laparoscopic and open appendectomy in management of uncomplicated and complicated appendicitis. *Annals of surgery* 2011;**254**(6): 927-932.
9. Katsuno G, Nagakari K, Yoshikawa S, Sugiyama K, Fukunaga M. Laparoscopic Appendectomy for Complicated Appendicitis: A Comparison with Open Appendectomy. *World Journal of Surgery* 2009;**33**(2): 208-214.
10. Masoomi H, Mills S, Dolich MO, Ketana N, Carmichael JC, Nguyen NT, Stamos MJ. Comparison of Outcomes of Laparoscopic Versus Open Appendectomy in Adults: Data from the Nationwide Inpatient Sample (NIS), 2006–2008. *Journal of Gastrointestinal Surgery* 2011;**15**(12): 2226-2231.
11. Litz CN, Ciesla DJ, Danielson PD, Chandler NM. Effect of hospital type on the treatment of acute appendicitis in teenagers. *Journal of Pediatric Surgery* 2018;**53**(3): 446-448.
12. Reames BN, Shubeck SP, Birkmeyer JD. Strategies for reducing regional variation in the use of surgery a systematic review. *Annals of surgery* 2014;**259**(4): 616.
13. Practice TDloHPaC. The Dartmouth Atlas Project Database. 1996 - 2010.
14. Scoreboard MIP. Central Statistics Office statistical release. In: June; 2015.
15. McPherson K, Wennberg JE, Hovind OB, Clifford P. Small-area variations in the use of common surgical procedures: an international comparison of New England, England, and Norway. *New England journal of medicine* 1982;**307**(21): 1310-1314.
16. Sauerland S, Jaschinski T, Neugebauer EAM. Laparoscopic versus open surgery for suspected appendicitis. *Cochrane Database of Systematic Reviews* 2010(10).
17. Faiz O, Clark J, Brown T, Bottle A, Antoniou A, Farrands P, Darzi A, Aylin P. Traditional and laparoscopic appendectomy in adults: outcomes in English NHS hospitals between 1996 and 2006. *Annals of surgery* 2008;**248**(5): 800-806.
18. Ray-Coquard I, Philip T, Lehmann M, Fervers B, Farsi F, Chauvin F. Impact of a clinical guidelines program for breast and colon cancer in a French cancer center. *Jama* 1997;**278**(19): 1591-1595.
19. Wennberg JE. Dealing with medical practice variations: a proposal for action. *Health Affairs* 1984;**3**(2): 6-33.

- 1  
2  
3 20. Doumouras AG, Saleh F, Eskicioglu C, Amin N, Cadeddu M, Hong D. Neighborhood variation  
4 in the utilization of laparoscopy for the treatment of colon cancer. *Diseases of the Colon & Rectum*  
5 2016;**59**(8): 781-788.  
6 21. Right Iliac Fossa Pain Treatment (RIFT) Study: protocol for an international, multicentre,  
7 prospective observational study. *BMJ open* 2018;**8**(1): e017574.  
8  
9  
10  
11  
12  
13  
14  
15  
16  
17  
18  
19  
20  
21  
22  
23  
24  
25  
26  
27  
28  
29  
30  
31  
32  
33  
34  
35  
36  
37  
38  
39  
40  
41  
42  
43  
44  
45  
46  
47  
48  
49  
50  
51  
52  
53  
54  
55  
56  
57  
58  
59  
60

1  
2  
3 **Figure legend:**

4 **Figure 1** - Proportion of appendectomies conducted as laparoscopic procedures during  
5  
6  
7 2014-2017 in children and adult patients

8  
9  
10 **Figure 2** – Number of procedures performed during 2014-2017 on county residents

11  
12  
13 **Figure 3** – Crude 4-years rate with laparoscopy and open appendectomy procedures per  
14  
15 100,000 residents

16  
17  
18 **Figure 4** - Ratio of observed/expected number of episodes of appendectomy by county for  
19  
20 children and adults

21  
22  
23 **Figure 5** - Association between children and adult's ratio of observed/expected number of  
24  
25 episodes of appendectomy by county

26  
27  
28 **Figure 6** - Ratio of observed/expected number of episodes of laparoscopy and open  
29  
30 appendectomy by county for children and adults

31  
32  
33 **Table 1** – Proportion of laparoscopic appendectomies per year by county of residence for  
34  
35 child and adult population

36  
37  
38  
39 **Table 2** – Variation statistics for the whole population and subpopulations of children and  
40  
41 adults

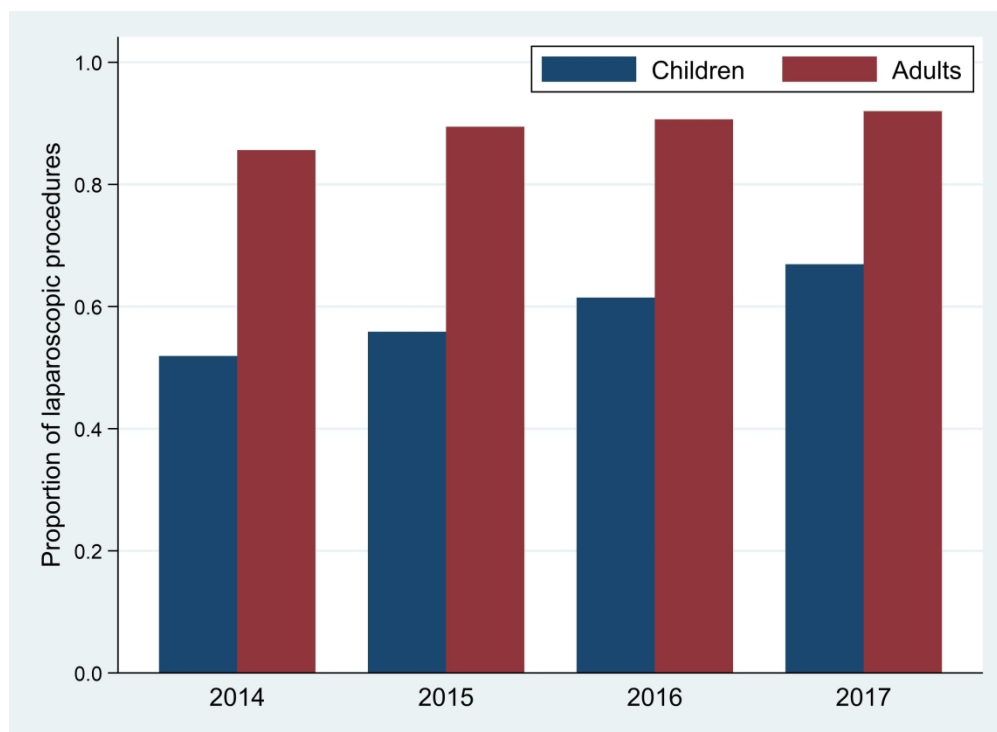

Proportion of appendectomies conducted as laparoscopic procedures during 2014-2017 in children and adult patients

279x203mm (300 x 300 DPI)

1  
2  
3  
4  
5  
6  
7  
8  
9  
10  
11  
12  
13  
14  
15  
16  
17  
18  
19  
20  
21  
22  
23  
24  
25  
26  
27  
28  
29  
30  
31  
32  
33  
34  
35  
36  
37  
38  
39  
40  
41  
42  
43  
44  
45  
46  
47  
48  
49  
50  
51  
52  
53  
54  
55  
56  
57  
58  
59  
60

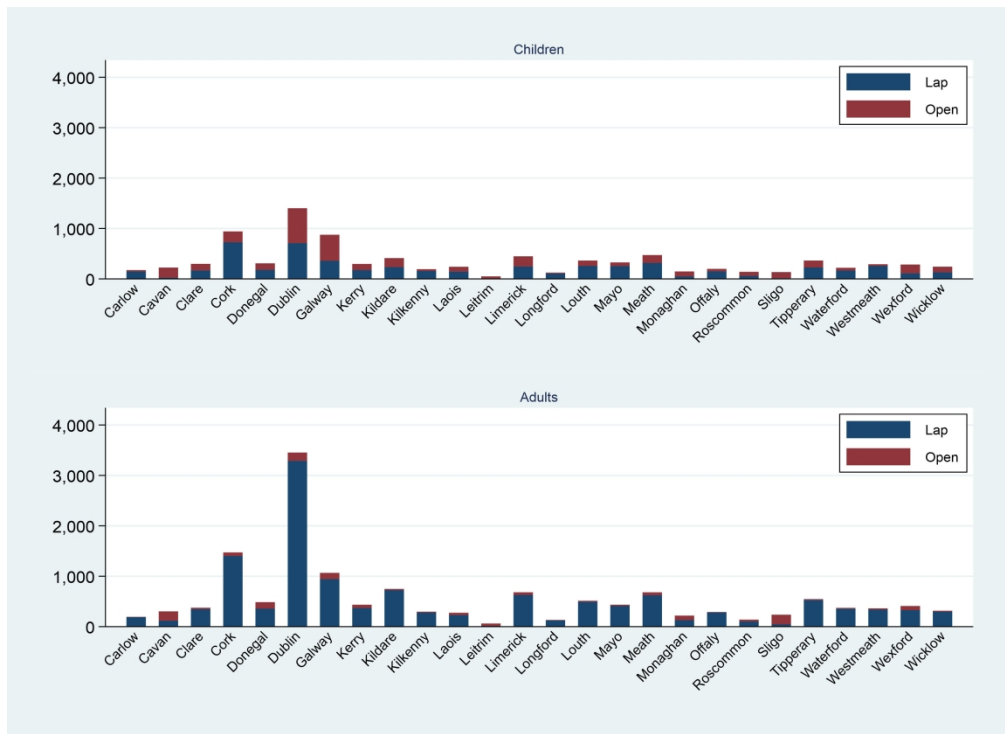

Number of procedures performed during 2014-2017 on county residents

279x203mm (300 x 300 DPI)

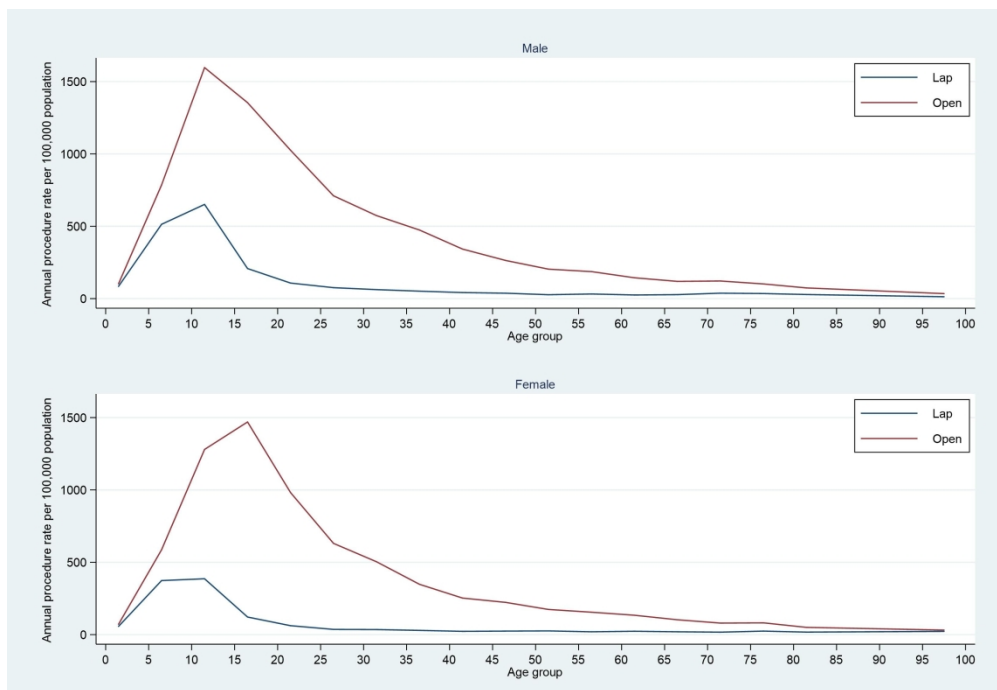

Crude 4-years rate with laparoscopy and open appendectomy procedures per 100,000 residents

279x191mm (300 x 300 DPI)

1  
2  
3  
4  
5  
6  
7  
8  
9  
10  
11  
12  
13  
14  
15  
16  
17  
18  
19  
20  
21  
22  
23  
24  
25  
26  
27  
28  
29  
30  
31  
32  
33  
34  
35  
36  
37  
38  
39  
40  
41  
42  
43  
44  
45  
46  
47  
48  
49  
50  
51  
52  
53  
54  
55  
56  
57  
58  
59  
60

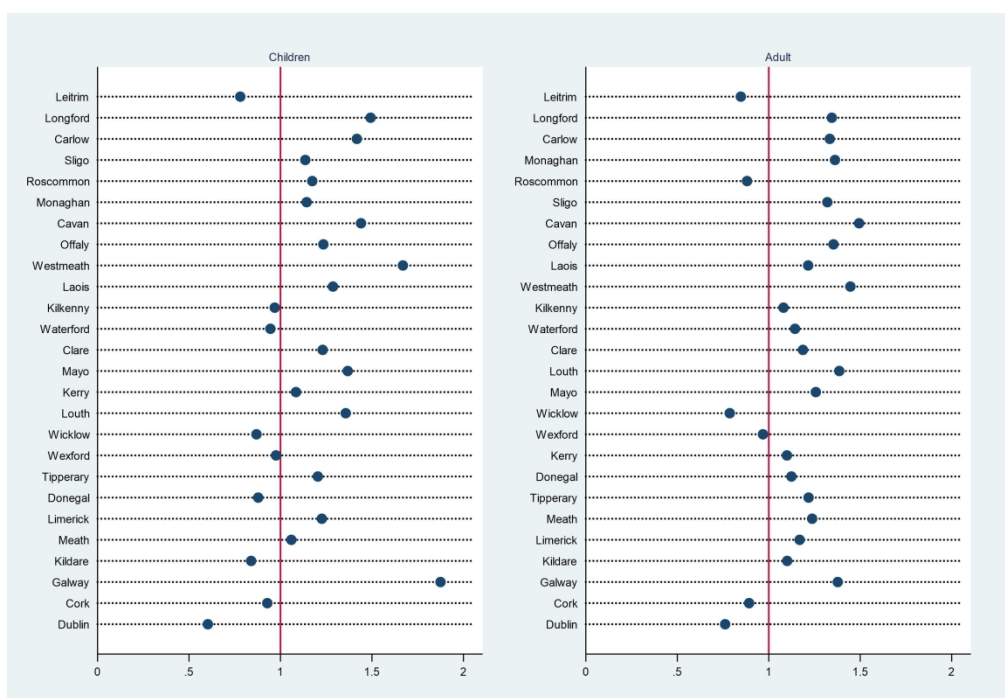

Ratio of observed/expected number of episodes of appendectomy by county for children and adults  
276x190mm (300 x 300 DPI)

1  
2  
3  
4  
5  
6  
7  
8  
9  
10  
11  
12  
13  
14  
15  
16  
17  
18  
19  
20  
21  
22  
23  
24  
25  
26  
27  
28  
29  
30  
31  
32  
33  
34  
35  
36  
37  
38  
39  
40  
41  
42  
43  
44  
45  
46  
47  
48  
49  
50  
51  
52  
53  
54  
55  
56  
57  
58  
59  
60

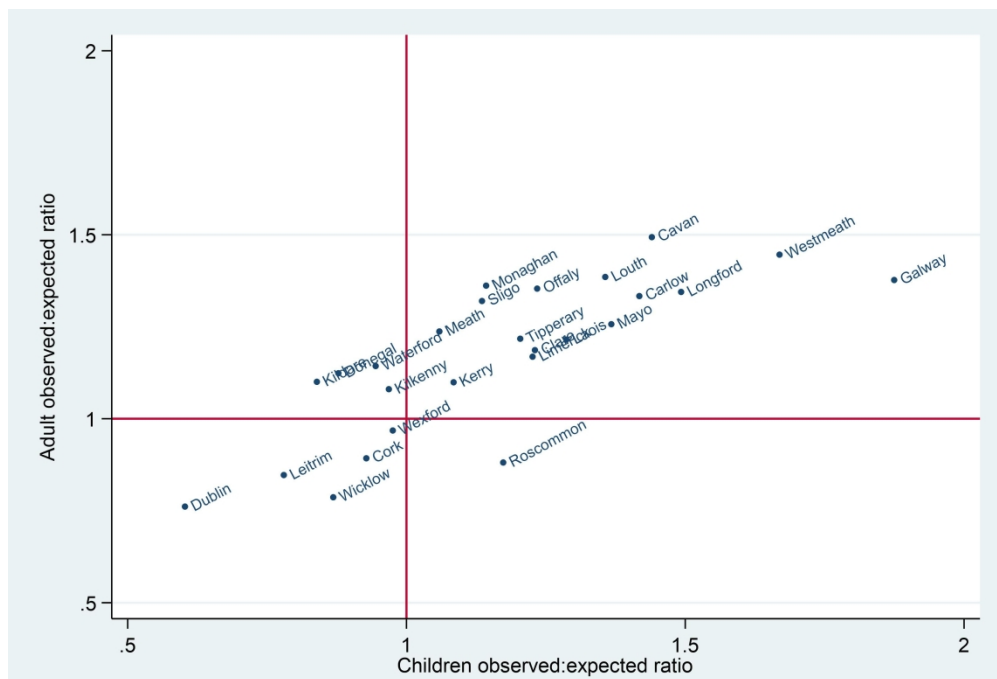

Association between children and adult's ratio of observed/expected number of episodes of appendectomy by county

279x188mm (300 x 300 DPI)



1  
2  
3  
4  
5  
6  
7  
8  
9  
10  
11  
12  
13  
14  
15  
16  
17  
18  
19  
20  
21  
22  
23  
24  
25  
26  
27  
28  
29  
30  
31  
32  
33  
34  
35  
36  
37  
38  
39  
40  
41  
42  
43  
44  
45  
46  
47  
48  
49  
50  
51  
52  
53  
54  
55  
56  
57  
58  
59  
60

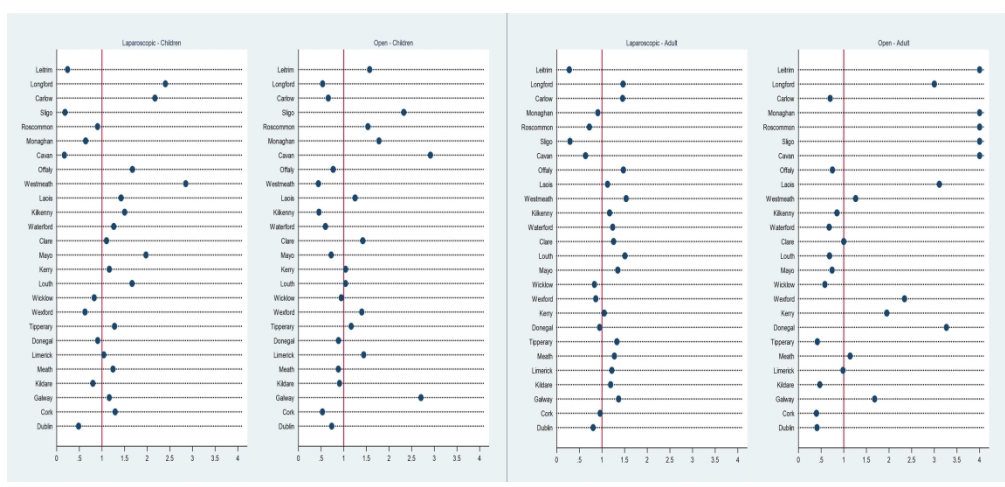

279x131mm (300 x 300 DPI)

# BMJ Open

## Exploring geographic variation in acute appendectomy in Ireland: a cohort study

|                                 |                                                                                                                                                                                                                                |
|---------------------------------|--------------------------------------------------------------------------------------------------------------------------------------------------------------------------------------------------------------------------------|
| Journal:                        | <i>BMJ Open</i>                                                                                                                                                                                                                |
| Manuscript ID                   | bmjopen-2018-025231.R1                                                                                                                                                                                                         |
| Article Type:                   | Research                                                                                                                                                                                                                       |
| Date Submitted by the Author:   | 14-Mar-2019                                                                                                                                                                                                                    |
| Complete List of Authors:       | Ahmed, O; Wexford General Hospital, General Surgery<br>Mealy, Ken; Wexford General Hospital, General and Colorectal Surgery<br>Sorensen, Jan; Royal College of Surgeons in Ireland, Health Outcomes Research Centre            |
| <b>Primary Subject Heading</b>: | Health services research                                                                                                                                                                                                       |
| Secondary Subject Heading:      | Surgery, Health policy, Paediatrics, Public health                                                                                                                                                                             |
| Keywords:                       | Health policy < HEALTH SERVICES ADMINISTRATION & MANAGEMENT, Organisation of health services < HEALTH SERVICES ADMINISTRATION & MANAGEMENT, PUBLIC HEALTH, Paediatric surgery < SURGERY, Adult surgery < SURGERY, appendicitis |
|                                 |                                                                                                                                                                                                                                |

SCHOLARONE™  
Manuscripts

# Exploring geographic variation in acute appendectomy in Ireland: a cohort study

Authors:

Ola Ahmed, Ken Mealy, Jan Sorensen

1. Department of General Surgery, Wexford General Hospital, Wexford, Ireland  
Ms Ola Ahmed  
Trainee Surgeon
2. National Clinical Programme in Surgery, Royal College of Surgeons in Ireland, Dublin 2, Ireland; Department of General Surgery, Wexford General Hospital, Wexford, Ireland  
Mr Ken Mealy  
Consultant Surgeon
3. Healthcare Outcomes Research Centre, Royal College of Surgeons in Ireland, Dublin 2, Ireland  
Professor Jan Sorensen  
Director of the Healthcare Outcomes Research Centre

**Correspondence to:** Ms Ola Ahmed, Department of General Surgery, Wexford General Hospital, Wexford, Ireland

**Email:** [olasdahmed@gmail.com](mailto:olasdahmed@gmail.com)

**Word count:** 2544

### Strengths and limitations of this study

- The study employed a large, well-defined patient population of the Republic of Ireland.
- All data was age and gender standardised as is standard when analysing geographical variation in healthcare, including the Dartmouth Atlas Project.
- The study does not include data from private hospitals, however acute appendicitis is largely managed in public hospitals regardless of medical insurance cover.
- Co-morbidities, procedural complexity and socioeconomic status were not controlled for when assessing patient characteristics.
- Future studies should expand on this study design and additional examination of regional and local variations perhaps in a risk adjusted setting should be a priority.

**Abstract**

**Objective** To explore geographic variations in Irish laparoscopic and open appendectomy procedures.

**Design** Analysis based on 2014-2017 administrative hospital data from public hospitals.

**Setting** Counties of the Republic of Ireland.

**Participants** Irish residents with hospital admissions for an appendectomy as the principle procedure.

**Main outcome measures** Age and gender standardised laparoscopic and open appendectomy rates for 26 counties. Geographic variation measured with the extremal quotient (EQ), coefficient of variation (CV) and the systematic component of variation (SCV).

**Results** 23,684 appendectomies were included. 77.6% (n= 18,387) were performed laparoscopically. An EQ of 8.3 for laparoscopy and 10.0 for open appendectomy was determined. A high CV was demonstrated with a value of 36.7 and 80.8 for laparoscopic and open appendectomy. A SCV of 14.2 and 124.8 for laparoscopic and open appendectomy was observed. A wider variation was determined when children and adults were assessed separately.

**Conclusions** The geographic distribution in rates of appendectomy varies considerably across Irish counties. Our data suggests that a patient's likelihood of undergoing a laparoscopic or open appendectomy is associated with their county of residence.

## Introduction

Acute appendicitis continues to be a global disease with escalating incidence rates in rapidly developing and industrialised countries<sup>1</sup>. These epidemiological associations contribute to the evolving knowledge on the pathogenesis of acute appendicitis and the influences of environmental triggers<sup>2,3</sup>. Modern advances in laparoscopic surgery over the past two decades have led to the demonstrable advantage of laparoscopic appendectomy over open techniques across all populations<sup>4-6</sup>. Laparoscopy is associated with shorter hospital length of stay, decreased analgesic requirements, and lower morbidity rates in comparison with open surgery<sup>4,7,8</sup>. However, while laparoscopic approaches are preferred in most instances, open appendectomy is still practiced in cases where laparoscopy is difficult or contraindicated.

Analysing regional variations in the provision of common procedures helps raise questions relating to service provision as well as identify opportunities for improving efficiency and observing best practice. The Dartmouth Atlas Project has shown wide variations of up to 10-fold for a multitude of surgical procedures across geographical sites in the United States<sup>9</sup>. This initiative has led to several studies of geographic variation in other countries which appear to demonstrate that a patient's likelihood of undergoing specific surgical procedures depends greatly on where they live<sup>10-13</sup>.

Reasons for the regional variability of laparoscopic and open appendectomy are still unclear. The observed rates of open appendectomy vary widely in the literature from 6 – 35% with higher variations in the adult population<sup>14-16</sup>. The aim of this study was to systematically investigate the regional variation of the surgical care of acute appendicitis in the Republic of Ireland. We compare the national data of laparoscopic and open appendectomy rates for children and adults to provide a current view of regional variation rates. By analysing and comparing the patterns of utilisation of

1  
2  
3 both the adult and paediatric population in Ireland, we seek to understand the extent that area of  
4  
5 residence may influence the likelihood of undergoing either a laparoscopic or open procedure.  
6  
7  
8  
9  
10

## 11 **Methods**

### 12 **Data extraction**

13  
14 Anonymised patient data were obtained for a 4-year period from 2014 to 2017 from the National  
15  
16 Quality Assurance and Improvement System (NQAIS). NQAIS is an online application based on the  
17  
18 Hospital Inpatient Enquiry system (HIPE) operated by the national Health Service Executive in  
19  
20 Ireland. Established in 1971, HIPE collects clinical and administrative data on discharges from acute  
21  
22 Irish public hospitals. A HIPE record is created following a patient's discharge from a public hospital  
23  
24 and offers demographic and clinical information for the episode of care. The current HIPE system  
25  
26 only holds data for public hospitals and no national database is available on the activities in the  
27  
28 private hospital sector. This analysis includes only patients treated in public hospitals regardless of  
29  
30 their individual insurance status. We obtained records of all hospital episodes coded with  
31  
32 laparoscopic appendectomy or open appendectomy as the primary procedure. From this sample we  
33  
34 excluded episodes with primary diagnostic codes different from "Appendicitis", "Suspected  
35  
36 appendicitis", or "Rule-out appendicitis" (i.e. not coded with K35-37 in the International  
37  
38 Classification of Diseases Version 10 Clinical Modification (ICD-10-CM)), episodes coded as non-  
39  
40 emergency admissions, and episodes for patients who are not residents in Ireland.  
41  
42  
43  
44  
45  
46

47 The Republic of Ireland is made up of 26 geographical subdivisions referred to as counties. These  
48  
49 counties were used in this study to determine appendectomy rates per geographical area. County of  
50  
51 residence is a variable in HIPE which can be utilised to determine residential status of individual  
52  
53 cases irrespective of where the actual procedure was performed. We obtained population statistics  
54  
55 from the 2016 census from the Central Statistical Office<sup>17</sup>.  
56  
57  
58  
59  
60

1  
2  
3 Patient factors considered in the analysis were age, gender and county of residence. Children were  
4  
5 categorized as patients aged 14 years or younger to correspond with the 5-year age groups in the  
6  
7 available census data. National age and gender stratification was derived from the population of  
8  
9 4,761,865 referred to in the 2016-population census<sup>17</sup>.

### 12 13 **Statistical analysis**

14  
15 Data was analysed using Stata version 15.1 (StataCorp, Texas). Descriptive statistics were recorded  
16  
17 for patient characteristics and procedure type. Continuous variables were compared using unpaired  
18  
19 t-tests. Association of categorical variables (differences for dichotomous variables between groups)  
20  
21 was assessed using the chi-square ( $\chi^2$ ) test. Continuous numerical variables were reported as means  
22  
23 and standard deviations (SD). Categorical variables were reported as proportions or percentages.

24  
25 To assess relative variability we used methods described by McPhearson and colleagues<sup>12</sup>. These  
26  
27 established methods of geographic variation are widely used in small-area variation studies and  
28  
29 allow for context and comparison across geographical settings and countries<sup>13, 18, 19</sup>. The extremal  
30  
31 quotient (EQ) is presented as the ratio of the highest and lowest standardised county rate. A value  
32  
33 close to 1 indicates low variation in rates across counties. The coefficient of variation (CV) is a  
34  
35 measure of relative variability and is calculated as the standard deviation of the county rates divided  
36  
37 by the mean of county rates. A large score indicates large variability. The systematic component of  
38  
39 variation (SCV) is also a measure of variation. This is the difference between the random component  
40  
41 of variation and the total variation. A large SCV value indicates large systematic and regional  
42  
43 variation<sup>12</sup>. We estimated these variability measures for the whole population and for children and  
44  
45 adults separately.  
46  
47  
48  
49  
50

### 51 52 **Patient involvement**

53  
54 No patients were involved in setting the research question or the outcome measures, nor were they  
55  
56 involved in the development of design or implementation of the study. No patients were asked to  
57  
58 advise on interpretation or writing up of results.  
59  
60



## Results

### National analysis

A total of 26,760 episodes of care discharged through January 1<sup>st</sup> 2014 to December 31<sup>st</sup> 2017 were extracted. In this sample 2,260 episodes were coded with diagnoses other than K35-K37; 1047 episodes were coded as non-emergency admissions; 341 episodes related to non-Ireland residents. After exclusion of these episodes, our study sample included 23,684 episodes of care of which 77.6% were laparoscopic appendectomies and 22.4% were open appendectomies. 53.7% of patients were male and the mean age was 25 years (SD 15, median 20, range 0-98). These findings are summarized in Table 1.

**Table 1** Number of adult and paediatric laparoscopic and open appendectomy

|                          | Laparoscopic (n (%)) | Open (n (%)) | P value |
|--------------------------|----------------------|--------------|---------|
| <b>Children (n=7343)</b> |                      |              |         |
| Male                     | 2068 (49.1%)         | 2140 (45.4%) |         |
| Female                   | 1790 (57.1%)         | 1345 (42.9%) | <0.01   |
| <b>Adult (n=16341)</b>   |                      |              |         |
| Male                     | 7387 (86.8%)         | 1126 (13.2%) |         |
| Female                   | 7142 (91.2%)         | 686 (8.8%)   | <0.01   |

The percentage of laparoscopic procedures was 52.5% among children and 88.9% among adults (statistically significant difference; OR 7.2 95% CI 6.8-7.7). Figure 1 displays the proportion of appendectomies conducted as laparoscopic procedures for 2014 to 2017 in children and adult patients. The proportion of laparoscopic procedures increased steadily during the studied years from 2014 to 2017 from 72.7% to 83.3% (trend  $p<0.01$ ). For children the proportion increased from 43.9% to 61.4% (trend  $p<0.01$ ).

Girls were more likely to have laparoscopic procedures than boys (57.1% vs 49.1%, OR 1.4 95% CI 1.3-1.5), and women more likely than men (91.2% vs 86.8%, OR 1.6 95% CI 1.4-1.8). A clear age gradient was observed for the whole population and for men and women separately (trend  $p<0.01$ ). The proportion of patients undergoing laparoscopic procedures reduced for older patients (logistic regression  $p<0.01$ ) and appears statistically lower for patients older than 45 years ( $p<0.01$ ).

1  
2  
3 Figure 2 displays the number of laparoscopic and open procedures performed on children and adults  
4 during the years 2014 to 2017 by county of residence.  
5  
6  
7

### 8 **County analysis**

9  
10 The annual appendectomy rate was estimated at 124.4 procedures per 100,000 persons and 96.5  
11 and 27.8 for laparoscopic and open approaches respectively. The online supplementary table  
12  
13 2 shows the proportion of laparoscopic appendectomies per year by county of residence for the child  
14 and adult population. The data displays a gradual increase in the number of laparoscopic procedures  
15 performed in both patient groups during the 4-year study period.  
16  
17  
18  
19  
20  
21

22 Figure 3 presents the ratio of the observed and expected number of the total appendectomy rates  
23 within different counties for both children and adults and displays the geographic dispersions  
24 determined. The expected number of procedures was estimated by relating the national age and  
25 gender procedure rate to the county population. A value of 1 was determined to be the national  
26 average rate to allow for comparison between geographic areas. The ratio takes a value larger than  
27 1 when the numbers of observed procedures are higher than the expected number of procedures.  
28  
29 For children, 17/26 counties displayed a higher than average rate of appendectomy procedures. For  
30 the adult population, residents from 20/26 counties underwent appendectomy procedures at a  
31 higher rate than the national average.  
32  
33  
34  
35  
36  
37  
38  
39  
40  
41  
42

43 Figure 4 presents the association between the ratio of observed and expected procedures for  
44 children and adults. Counties in the north-east quadrant have a higher than expected number of  
45 procedures for both children and adults. These counties demonstrate higher rates of appendectomy  
46 procedures for their entire populations. There appears to be a strong association between the ratio  
47 for children and adults indicating that counties with a higher ratio for children also have a higher  
48 ratio for adults. Counties in the south-west quadrant have a lower than expected number of  
49 procedures for both children and adults. Using similar reasoning, counties with lower rates of  
50 paediatric appendectomy procedures appeared to have low rates for the adult population also. Only  
51  
52  
53  
54  
55  
56  
57  
58  
59  
60

1  
2  
3 four counties have a different pattern. Roscommon is the only county where children have more  
4 than the expected episodes of care and adults have fewer than the expected episodes of care, while  
5 the reverse appears for Kilkenny, Waterford, Donegal and Kildare. These remaining four counties  
6 display high rates in the adult population but lower than average rates in the paediatric patient  
7 group.  
8  
9

10  
11  
12  
13  
14  
15 Figure 5 displays the ratio of observed and expected procedures for laparoscopic and open  
16 procedures for children and adults separately. Wide population dispersions are demonstrated in  
17 children for both laparoscopic and open appendectomy. In 16/26 counties children underwent  
18 laparoscopic appendectomy at rates higher than the national average, indicating areas with high  
19 utilisation. Children from 13/26 counties underwent higher rates of open appendectomy procedures  
20 than the rest of the general population. Similarly, adults in 16/26 counties had higher rates of  
21 laparoscopic procedures than the rest of the national population, and adults from 12/26 counties  
22 underwent higher rates of open appendectomy procedures. Wide dispersions are particularly  
23 evident in the adult population with open appendectomy.  
24  
25  
26  
27  
28  
29  
30  
31  
32  
33  
34  
35

36 Table 2 displays the statistical measures of variation for the combined population and children and  
37 adults separately. The extremal quotient was 8.3 for laparoscopic and 10.0 for open appendectomy,  
38 demonstrating greater geographic variation for open appendectomy. The coefficient of variation was  
39 high for both laparoscopic and open appendectomy; 36.7 for laparoscopic and 80.8 for open  
40 procedures, in accordance with the McPhearson interpretations. This demonstrates greater  
41 geographic variability in the application of open appendectomy cases. The systematic component of  
42 variation was also high for both procedures; 14.2 for laparoscopy and 124.8 for open appendectomy.  
43  
44  
45  
46  
47  
48  
49  
50  
51  
52  
53  
54  
55  
56  
57  
58  
59  
60

**Table 2.** Variation statistics for laparoscopy, open and combined for children, adult and the whole patient population, 2014-2017.

| Population/procedure    | Number of episodes 2014-2017 | Standardised number of episodes per 100.000 population | Extremal Quotient | Coefficient of Variation | Systematic Component of Variation |
|-------------------------|------------------------------|--------------------------------------------------------|-------------------|--------------------------|-----------------------------------|
| <b>Children</b>         |                              |                                                        |                   |                          |                                   |
| Laparoscopy             | 3858                         | 383.3                                                  | 16.9              | 55.1                     | 41.6                              |
| Open                    | 3485                         | 346.2                                                  | 6.5               | 55.3                     | 38.2                              |
| Combined                | 7343                         | 729.5                                                  | 3.2               | 24.3                     | 9.3                               |
| <b>Adult</b>            |                              |                                                        |                   |                          |                                   |
| Laparoscopy             | 14529                        | 386.9                                                  | 7.1               | 33.3                     | 10.6                              |
| Open                    | 1812                         | 48.3                                                   | 25.7              | 128.4                    | 502.0                             |
| Combined                | 16341                        | 435.1                                                  | 2.1               | 18.9                     | 4.5                               |
| <b>Whole population</b> |                              |                                                        |                   |                          |                                   |
| Laparoscopy             | 18387                        | 386.1                                                  | 8.3               | 36.7                     | 14.2                              |
| Open                    | 5297                         | 111.2                                                  | 10.0              | 80.8                     | 124.8                             |
| Combined                | 23684                        | 497.4                                                  | 2.2               | 19.6                     | 5.6                               |

Extremal quotient =  $\max(\text{standardised episode rate } i) / \min(\text{standardised episode rate } i)$ .

Coefficient of variation =  $\text{standard deviation (standardised episode rate } i) / \text{mean (standardised episode rate } i) * 100$ .

Systematic component of variations =  $1/k ( \sum (O_i - E_i)^2 / E_i^2 - \sum 1/E_i ) * 100$  where k is number of counties,  $O_i$  is observed number of episodes and  $E_i$  is expected number of episodes determined by indirect standardisation.

## Discussion

This study documents a substantial geographic variation in the operative management of acute appendicitis in the Republic of Ireland. To our knowledge, there have been no population-based studies exploring emergency appendectomy variations at a county level in Ireland. While some level of disparity is to be expected, large variations particularly in emergency interventions can indicate potential inequity and inefficiency in the use of sophisticated healthcare systems, and thus indicate variations in access and use of surgical services. Similar to the Dartmouth Atlas project, our data demonstrates that a person's likelihood of undergoing a laparoscopic or open appendectomy is related to their county of residence<sup>9</sup>.

Laparoscopic appendectomy is favoured because of its benefits in analgesic requirements post-operatively, shorter length of hospital stay, lower post-operative mortality, and faster return to normal activities<sup>4, 7, 8, 20, 21</sup>. Unsurprisingly, most of the cases in our data were performed laparoscopically. As with most observational data, causality cannot be determined. Historical research suggests that the variations in the utility of surgical services may result from clinical uncertainty or heterogeneity in medical literature<sup>22, 23</sup>. One potential hypothetical and important reason for the variations could be individual surgeon skill and practice. The current study did not control for specific surgeon factors and may reflect a lack of laparoscopic skills or capacity in certain areas and explain the higher statistical variability for open procedures. Variations in laparoscopic surgery rates are not unheard of. An analyses by Doumouras et al suggested that laparoscopic training may influence the rate of laparoscopic practices in some hospitals<sup>24</sup>. While our study did not evaluate larger teaching hospitals separately, there may be an inherent geographic variation in laparoscopic expertise outside of tertiary referral centres and may also reflect variation in consultant and trainee surgeon performance as the principle operator; a factor not examined in this study.

In this study laparoscopic appendectomy utilisation appears lower in children and may indicate a deficiency in the paediatric surgery skillset available in the country and an unfamiliarity in operating on children amongst general surgeons. Multiple reports have stressed the need to provide high

1  
2  
3 quality paediatric surgery services to address the challenges and demands of paediatric patients  
4  
5 which may be unavailable in hospitals where adult surgery appears to dominate. The findings of this  
6  
7 study suggest a potential difference in expertise in relation to paediatric surgery in Ireland. This  
8  
9 would parallel with the reality that most district or general hospitals in Ireland lack a specialised  
10  
11 paediatric surgeon on site and thus cases are performed by adult surgeons. These findings suggest a  
12  
13 potential difference in expertise in relation to paediatric surgery in Ireland.  
14  
15

16  
17 There are some limitations to this study. As with other studies including data from administrative  
18  
19 databases, the reliability of results is based on the accuracy and completeness of systematic coding  
20  
21 and data input. We attempt to overcome potential miscoding information by including a large  
22  
23 population cohort of patients over a four-year period. We have not accounted for laparoscopic cases  
24  
25 that were converted to open due to the potential inclusion of duplicate numbers and inherent  
26  
27 miscoding errors. Co-morbidities, procedural complexity and socioeconomic status were also not  
28  
29 controlled for when assessing patient characteristics. However, despite these limitations our findings  
30  
31 demonstrate concerning conclusions relating to the provision of emergency appendectomy in the  
32  
33 Republic of Ireland for both children and adults. The analysis provides some important implications  
34  
35 for health care providers and surgeons in analysing the extent of geographic variation and the  
36  
37 disparity in management of a common condition. While we cannot explain the wide variations seen,  
38  
39 further analysis at an individual county level with the assessment of more in-depth patient  
40  
41 characteristics may uncover opportunities to eliminate variations and ultimately improve the  
42  
43 delivery of care and patient outcomes. We also await the results of the multi-institutional Right Iliac  
44  
45 Fossa Treatment (RIFT audit) study to further analyse the variation in the management strategies of  
46  
47 patients presenting with RIF pain to centres across the United Kingdom, Ireland, Italy, Portugal and  
48  
49 Spain<sup>25</sup>.  
50  
51  
52  
53  
54  
55  
56  
57  
58  
59  
60

## Conclusion

Geographic variation analyses can help characterise the overall performance of a health system and determine whether patients receive equal treatment for equal needs. High appendectomy rates with considerable geographical disparity may suggest an imbalance in the provision of a common acute surgical procedure in the Republic of Ireland. Some populations appear more likely to undergo laparoscopic procedures than other populations within a relatively small country. Large statistical variability in the paediatric population may also reflect a discrepancy in surgical paediatric care in areas where these procedures are largely performed by surgeons specialising in adult care. This is the first Irish study to systematically explore the rates and geographical disparity of acute laparoscopic and open appendectomy procedures and help bridge a pre-existing knowledge gap on the topic. Despite the limitations, the study suggests a need for more effective decision-making and planning to ensure consistency and decrease the variability in the management of acute appendicitis.

1  
2  
3 **Contributors:** OA conceived and designed the study, analysed the data and drafted and revised the  
4 paper. JS designed the study, prepared and analysed the data, drafted and revised the paper. KM  
5 interpreted the results and revised the paper. All authors had full access to all the data (including  
6 statistical reports and tables) in the study and can take responsibility for the integrity of the data and  
7 the accuracy of the data analysis. OA is the guarantor and affirms that the manuscript is an honest,  
8 accurate, and transparent account of the study being reported; that no important aspects of the  
9 study have been omitted; and that any discrepancies from the study as originally planned (and, if  
10 relevant, registered) have been explained.  
11  
12  
13  
14  
15  
16  
17  
18  
19  
20

21 **Funding:** This research received no specific grant from any funding agency in the public, commercial  
22 or not-for-profit sectors.  
23  
24  
25

26 **Competing interests:** All authors declare no conflicts in interests in the preparation of this study and  
27 declare: no support from any organisation for the submitted work; no financial relationships with  
28 any organisations that might have an interest in the submitted work in the previous three years; no  
29 other relationships or activities that could appear to have influenced the submitted work.  
30  
31  
32  
33  
34  
35

36 **Ethical approval:** Ethics board approval was not required for the study.  
37  
38

39 **Data sharing:** All data has been included either in the main manuscript or as a supplementary file.  
40 The authors do not withhold any other data.  
41  
42  
43

#### 44 **Acknowledgments**

45  
46  
47 The authors acknowledge the Healthcare Pricing Office as the source of HIPE (Hospital In-Patient  
48 Enquiry) data which is utilised in NQAIS Clinical. The authors also acknowledge the Clinical Leads of  
49 the National Clinical Programme in Surgery, the NQAIS Clinical Steering Group, the HORC-NCP  
50 research group, and the Acute Hospital Division (HSE) for providing access to NQAIS Clinical.  
51  
52  
53  
54  
55  
56  
57  
58  
59  
60



## References

1. Ferris M, Quan S, Kaplan BS, Molodecky N, Ball CG, Chernoff GW, et al. The Global Incidence of Appendicitis: A Systematic Review of Population-based Studies. *Annals of surgery* 2017;**266**(2): 237-241.
2. Kaplan GG, Dixon E, Panaccione R, Fong A, Chen L, Szyszkowicz M, et al. Effect of ambient air pollution on the incidence of appendicitis. *Canadian Medical Association Journal* 2009;**181**(9): 591-597.
3. Kaplan GG, Tanyingoh D, Dixon E, Johnson M, Wheeler AJ, Myers RP, et al. Ambient ozone concentrations and the risk of perforated and nonperforated appendicitis: a multicity case-crossover study. *Environmental health perspectives* 2013;**121**(8): 939.
4. Tate JJT, Dawson JW, Chung SCS, Lau WY, Li AKC. Laparoscopic versus open appendectomy: prospective randomised trial. *The Lancet* 1993;**342**(8872): 633-637.
5. Southgate E, Vousden N, Karthikesalingam A, Markar SR, Black S, Zaidi A. Laparoscopic vs open appendectomy in older patients. *Archives of Surgery* 2012;**147**(6): 557-562.
6. Adwan H, Weerasuriya CK, Endleman P, Barnes A, Stewart L, Justin T. Laparoscopic versus open appendectomy in children: A UK District General Hospital experience. *Journal of Pediatric Surgery* 2014;**49**(2): 277-279.
7. Thomson J-E, Kruger D, Jann-Kruger C, Kiss A, Omoshoro-Jones J, Luvhengo T, et al. Laparoscopic versus open surgery for complicated appendicitis: a randomized controlled trial to prove safety. *Surgical endoscopy* 2015;**29**(7): 2027-2032.
8. Tiwari MM, Reynoso JF, Tsang AW, Oleynikov D. Comparison of outcomes of laparoscopic and open appendectomy in management of uncomplicated and complicated appendicitis. *Annals of surgery* 2011;**254**(6): 927-932.
9. Practice TDloHPaC. The Dartmouth Atlas Project Database. 1996 - 2010.
10. Reames BN, Shubeck SP, Birkmeyer JD. Strategies for Reducing Regional Variation in the Use of Surgery A Systematic Review. *Annals of surgery* 2014;**259**(4): 616.
11. Ahmed O, Mealy K, Kelliher G, Keane F, Sorensen J. Exploring geographical variation in access to general surgery in Ireland: Evidence from a national study. *The Surgeon* 2019.
12. McPherson K, Wennberg JE, Hovind OB, Clifford P. Small-area variations in the use of common surgical procedures: an international comparison of New England, England, and Norway. *New England journal of medicine* 1982;**307**(21): 1310-1314.
13. Weeks WB, Paraponaris A, Ventelou B. Geographic variation in rates of common surgical procedures in France in 2008–2010, and comparison to the US and Britain. *Health Policy* 2014;**118**(2): 215-221.
14. Katsuno G, Nagakari K, Yoshikawa S, Sugiyama K, Fukunaga M. Laparoscopic Appendectomy for Complicated Appendicitis: A Comparison with Open Appendectomy. *World Journal of Surgery* 2009;**33**(2): 208-214.
15. Masoomi H, Mills S, Dolich MO, Ketana N, Carmichael JC, Nguyen NT, et al. Comparison of Outcomes of Laparoscopic Versus Open Appendectomy in Adults: Data from the Nationwide Inpatient Sample (NIS), 2006–2008. *Journal of Gastrointestinal Surgery* 2011;**15**(12): 2226-2231.
16. Litz CN, Ciesla DJ, Danielson PD, Chandler NM. Effect of hospital type on the treatment of acute appendicitis in teenagers. *Journal of Pediatric Surgery* 2018;**53**(3): 446-448.
17. Scoreboard MIP. Central Statistics Office statistical release. In: June; 2015.
18. Appleby J, Raleigh V, Frosini F, Bevan G, Gao H, Lyscom T. *Variations in health care: the good, the bad and the inexplicable*. King's Fund, 2011.
19. Birkmeyer JD, Reames BN, McCulloch P, Carr AJ, Campbell WB, Wennberg JE. Understanding of regional variation in the use of surgery. *The Lancet* 2013;**382**(9898): 1121-1129.
20. Sauerland S, Jaschinski T, Neugebauer EAM. Laparoscopic versus open surgery for suspected appendicitis. *Cochrane Database of Systematic Reviews* 2010(10).

- 1
- 2
- 3
- 4 21. Faiz O, Clark J, Brown T, Bottle A, Antoniou A, Farrands P, et al. Traditional and laparoscopic
- 5 appendectomy in adults: outcomes in English NHS hospitals between 1996 and 2006. *Annals of*
- 6 *surgery* 2008;**248**(5): 800-806.
- 7 22. Ray-Coquard I, Philip T, Lehmann M, Fervers B, Farsi F, Chauvin F. Impact of a clinical
- 8 guidelines program for breast and colon cancer in a French cancer center. *Jama* 1997;**278**(19): 1591-
- 9 1595.
- 10 23. Wennberg JE. Dealing with medical practice variations: a proposal for action. *Health Affairs*
- 11 1984;**3**(2): 6-33.
- 12 24. Doumouras AG, Saleh F, Eskicioglu C, Amin N, Cadeddu M, Hong D. Neighborhood variation
- 13 in the utilization of laparoscopy for the treatment of colon cancer. *Diseases of the Colon & Rectum*
- 14 2016;**59**(8): 781-788.
- 15 25. Right Iliac Fossa Pain Treatment (RIFT) Study: protocol for an international, multicentre,
- 16 prospective observational study. *BMJ open* 2018;**8**(1): e017574.
- 17
- 18
- 19
- 20
- 21
- 22
- 23
- 24
- 25
- 26
- 27
- 28
- 29
- 30
- 31
- 32
- 33
- 34
- 35
- 36
- 37
- 38
- 39
- 40
- 41
- 42
- 43
- 44
- 45
- 46
- 47
- 48
- 49
- 50
- 51
- 52
- 53
- 54
- 55
- 56
- 57
- 58
- 59
- 60

For peer review only

1  
2  
3 **Figure legend:**  
4

5 **Figure 1** - Proportion of appendectomies conducted as laparoscopic procedures during 2014-2017 in  
6 children and adult patients  
7

8  
9  
10 **Figure 2** – Number of procedures performed during 2014-2017 on county residents  
11

12  
13 **Figure 3** - Ratio of observed/expected number of episodes of appendectomy by county for children  
14 and adults.  
15

16  
17  
18 **Figure 4** - Association between children and adult's ratio of observed/expected number of episodes  
19 of appendectomy by county.  
20

21  
22  
23 **Figure 5** - Ratio of observed/expected number of episodes of laparoscopy and open appendectomy  
24 by county for children and adults.  
25

26  
27  
28 **Table 1** – Adult and paediatric laparoscopic and open appendectomy percentage rates.  
29

30  
31 **Table 2** – Variation statistics for laparoscopy, open and combined for children, adult and the whole  
32 patient population, 2014-2017.  
33

34  
35  
36 **Online supplementary table** – Proportion of laparoscopic appendectomies per year by county of  
37 residence for child and adult population.  
38  
39  
40  
41  
42  
43  
44  
45  
46  
47  
48  
49  
50  
51  
52  
53  
54  
55  
56  
57  
58  
59  
60

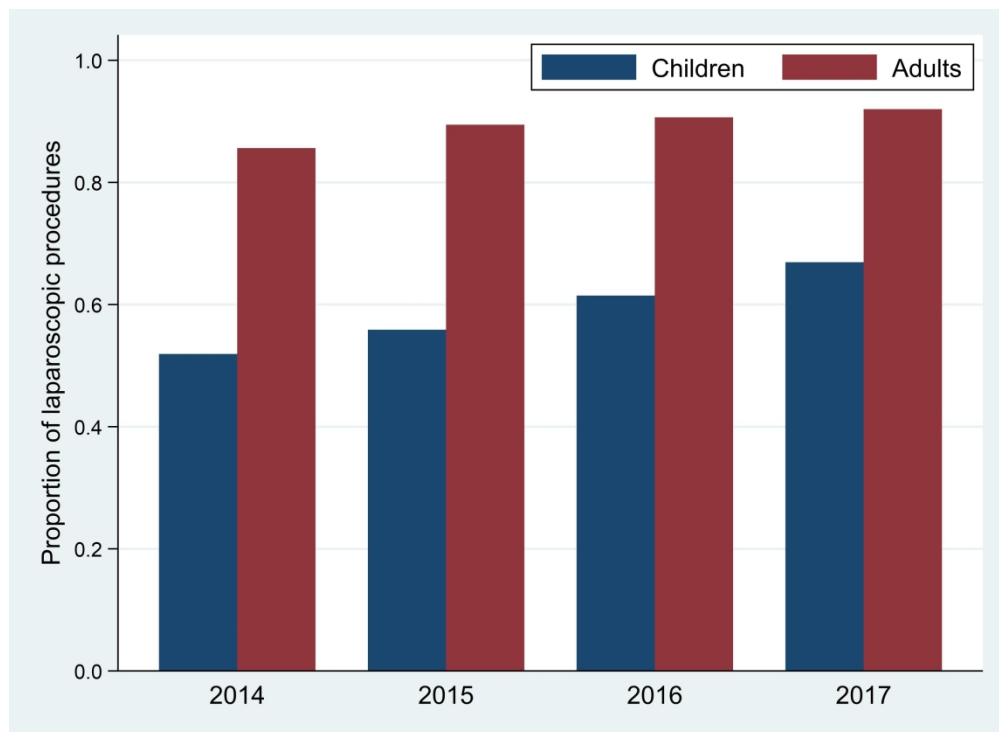

Proportion of appendectomies conducted as laparoscopic procedures during 2014-2017 in children and adult patients

279x203mm (300 x 300 DPI)

1  
2  
3  
4  
5  
6  
7  
8  
9  
10  
11  
12  
13  
14  
15  
16  
17  
18  
19  
20  
21  
22  
23  
24  
25  
26  
27  
28  
29  
30  
31  
32  
33  
34  
35  
36  
37  
38  
39  
40  
41  
42  
43  
44  
45  
46  
47  
48  
49  
50  
51  
52  
53  
54  
55  
56  
57  
58  
59  
60



Number of procedures performed during 2014-2017 on county residents

279x203mm (300 x 300 DPI)

1  
2  
3  
4  
5  
6  
7  
8  
9  
10  
11  
12  
13  
14  
15  
16  
17  
18  
19  
20  
21  
22  
23  
24  
25  
26  
27  
28  
29  
30  
31  
32  
33  
34  
35  
36  
37  
38  
39  
40  
41  
42  
43  
44  
45  
46  
47  
48  
49  
50  
51  
52  
53  
54  
55  
56  
57  
58  
59  
60

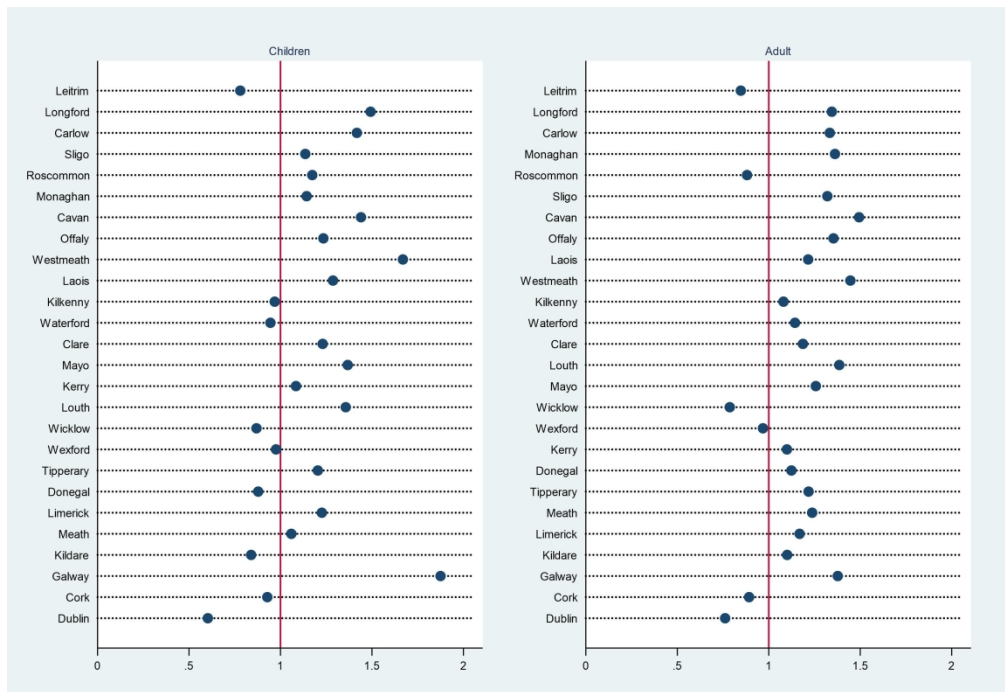

Ratio of observed/expected number of episodes of appendectomy by county for children and adults.

276x190mm (300 x 300 DPI)

1  
2  
3  
4  
5  
6  
7  
8  
9  
10  
11  
12  
13  
14  
15  
16  
17  
18  
19  
20  
21  
22  
23  
24  
25  
26  
27  
28  
29  
30  
31  
32  
33  
34  
35  
36  
37  
38  
39  
40  
41  
42  
43  
44  
45  
46  
47  
48  
49  
50  
51  
52  
53  
54  
55  
56  
57  
58  
59  
60

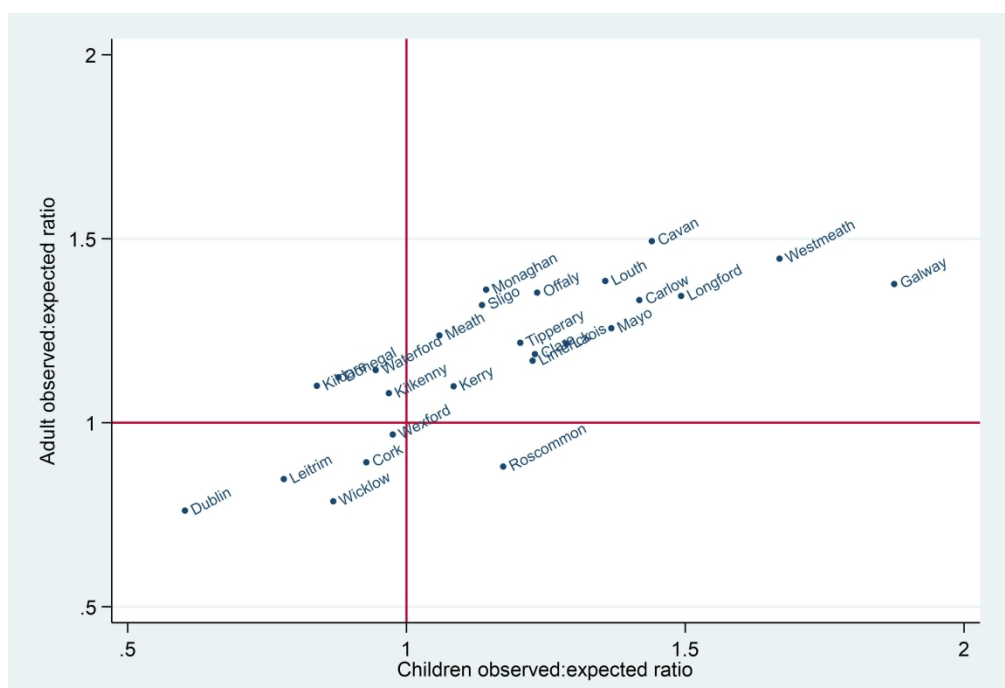

Association between children and adult's ratio of observed/expected number of episodes of appendectomy by county

279x188mm (300 x 300 DPI)

1  
2  
3  
4  
5  
6  
7  
8  
9  
10  
11  
12  
13  
14  
15  
16  
17  
18  
19  
20  
21  
22  
23  
24  
25  
26  
27  
28  
29  
30  
31  
32  
33  
34  
35  
36  
37  
38  
39  
40  
41  
42  
43  
44  
45  
46  
47  
48  
49  
50  
51  
52  
53  
54  
55  
56  
57  
58  
59  
60

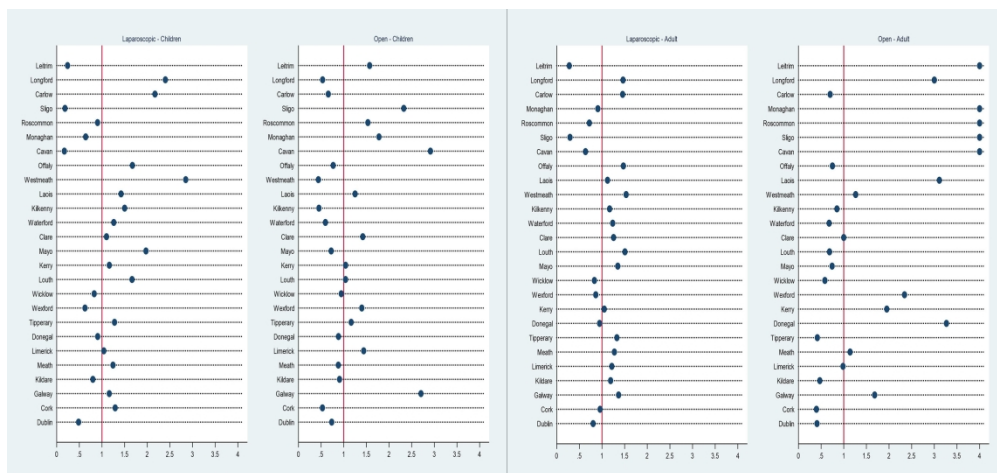

Ratio of observed/expected number of episodes of laparoscopy and open appendectomy by county for children and adults.

279x131mm (300 x 300 DPI)



**Online Supplementary Table** Proportion of laparoscopic appendectomies per year by county of residence for child and adult population

| Proportion of laparoscopic procedures |          |      |      |      |        |      |      |       |
|---------------------------------------|----------|------|------|------|--------|------|------|-------|
| County                                | Children |      |      |      | Adults |      |      |       |
|                                       | 2014     | 2015 | 2016 | 2017 | 2014   | 2015 | 2016 | 2017  |
| Carlow                                | 0.74     | 0.91 | 0.84 | 0.90 | 0.90   | 0.98 | 0.96 | 1.0   |
| Cavan                                 | 0.11     | 0.14 | 0.08 | 0.13 | 0.22   | 0.51 | 0.44 | 0.5   |
| Clare                                 | 0.56     | 0.43 | 0.59 | 0.65 | 0.90   | 0.94 | 0.88 | 0.97  |
| Cork                                  | 0.65     | 0.76 | 0.8  | 0.87 | 0.93   | 0.96 | 0.97 | 0.95  |
| Donegal                               | 0.25     | 0.46 | 0.77 | 0.89 | 0.54   | 0.73 | 0.78 | 0.86  |
| Dublin                                | 0.44     | 0.42 | 0.54 | 0.64 | 0.93   | 0.96 | 0.96 | 0.96  |
| Galway                                | 0.39     | 0.41 | 0.38 | 0.47 | 0.86   | 0.89 | 0.89 | 0.90  |
| Kerry                                 | 0.46     | 0.66 | 0.71 | 0.60 | 0.80   | 0.85 | 0.92 | 0.90  |
| Kildare                               | 0.49     | 0.62 | 0.64 | 0.56 | 0.97   | 0.97 | 0.98 | 0.98  |
| Kilkenny                              | 0.75     | 0.84 | 0.82 | 0.89 | 0.89   | 0.93 | 0.95 | 0.99  |
| Laois                                 | 0.47     | 0.45 | 0.64 | 0.81 | 0.80   | 0.78 | 0.79 | 0.96  |
| Leitrim                               | 0.14     | 0.27 | 0.11 | 0.22 | 0.27   | 0.15 | 0.33 | 0.46  |
| Limerick                              | 0.44     | 0.50 | 0.54 | 0.70 | 0.89   | 0.93 | 0.90 | 0.95  |
| Longford                              | 0.70     | 0.97 | 0.90 | 0.93 | 0.90   | 0.93 | 0.92 | 0.92  |
| Louth                                 | 0.66     | 0.61 | 0.78 | 0.77 | 0.96   | 0.97 | 0.93 | 0.96  |
| Mayo                                  | 0.73     | 0.83 | 0.78 | 0.79 | 0.94   | 0.94 | 0.98 | 0.94  |
| Meath                                 | 0.59     | 0.61 | 0.74 | 0.75 | 0.89   | 0.91 | 0.94 | 0.93  |
| Monaghan                              | 0.35     | 0.30 | 0.33 | 0.41 | 0.59   | 0.51 | 0.77 | 0.51  |
| Offaly                                | 0.65     | 0.78 | 0.83 | 0.78 | 0.94   | 0.98 | 1.00 | 0.95  |
| Roscommon                             | 0.42     | 0.39 | 0.50 | 0.47 | 0.69   | 0.68 | 0.75 | 0.865 |
| Sligo                                 | 0.12     | 0.1  | 0.09 | 0.19 | 0.18   | 0.19 | 0.20 | 0.19  |
| Tipperary                             | 0.63     | 0.68 | 0.60 | 0.60 | 0.94   | 0.98 | 0.98 | 0.98  |
| Waterford                             | 0.75     | 0.80 | 0.77 | 0.74 | 0.92   | 0.94 | 0.98 | 0.96  |
| Westmeath                             | 0.86     | 0.84 | 0.92 | 0.92 | 0.89   | 0.96 | 0.96 | 0.97  |
| Wexford                               | 0.25     | 0.19 | 0.53 | 0.52 | 0.68   | 0.67 | 0.82 | 0.93  |
| Wicklow                               | 0.67     | 0.61 | 0.50 | 0.40 | 0.98   | 0.90 | 0.94 | 0.97  |

**STROBE 2007 (v4) Statement—Checklist of items that should be included in reports of *cohort studies***

| Section/Topic                | Item # | Recommendation                                                                                                                                                                       | Reported on page # |
|------------------------------|--------|--------------------------------------------------------------------------------------------------------------------------------------------------------------------------------------|--------------------|
| <b>Title and abstract</b>    | 1      | (a) Indicate the study's design with a commonly used term in the title or the abstract                                                                                               | 1                  |
|                              |        | (b) Provide in the abstract an informative and balanced summary of what was done and what was found                                                                                  | 3                  |
| <b>Introduction</b>          |        |                                                                                                                                                                                      |                    |
| Background/rationale         | 2      | Explain the scientific background and rationale for the investigation being reported                                                                                                 | 4                  |
| Objectives                   | 3      | State specific objectives, including any prespecified hypotheses                                                                                                                     | 4                  |
| <b>Methods</b>               |        |                                                                                                                                                                                      |                    |
| Study design                 | 4      | Present key elements of study design early in the paper                                                                                                                              | 5                  |
| Setting                      | 5      | Describe the setting, locations, and relevant dates, including periods of recruitment, exposure, follow-up, and data collection                                                      | 5                  |
| Participants                 | 6      | (a) Give the eligibility criteria, and the sources and methods of selection of participants. Describe methods of follow-up                                                           | 5                  |
|                              |        | (b) For matched studies, give matching criteria and number of exposed and unexposed                                                                                                  | 5                  |
| Variables                    | 7      | Clearly define all outcomes, exposures, predictors, potential confounders, and effect modifiers. Give diagnostic criteria, if applicable                                             | 5                  |
| Data sources/<br>measurement | 8*     | For each variable of interest, give sources of data and details of methods of assessment (measurement). Describe comparability of assessment methods if there is more than one group | 5                  |
| Bias                         | 9      | Describe any efforts to address potential sources of bias                                                                                                                            | 5                  |
| Study size                   | 10     | Explain how the study size was arrived at                                                                                                                                            | 5                  |
| Quantitative variables       | 11     | Explain how quantitative variables were handled in the analyses. If applicable, describe which groupings were chosen and why                                                         | 5                  |
| Statistical methods          | 12     | (a) Describe all statistical methods, including those used to control for confounding                                                                                                | 6                  |
|                              |        | (b) Describe any methods used to examine subgroups and interactions                                                                                                                  | 6                  |
|                              |        | (c) Explain how missing data were addressed                                                                                                                                          | n/a                |
|                              |        | (d) If applicable, explain how loss to follow-up was addressed                                                                                                                       | n/a                |
|                              |        | (e) Describe any sensitivity analyses                                                                                                                                                | n/a                |
| <b>Results</b>               |        |                                                                                                                                                                                      |                    |

|                          |     |                                                                                                                                                                                                              |            |
|--------------------------|-----|--------------------------------------------------------------------------------------------------------------------------------------------------------------------------------------------------------------|------------|
| Participants             | 13* | (a) Report numbers of individuals at each stage of study—eg numbers potentially eligible, examined for eligibility, confirmed eligible, included in the study, completing follow-up, and analysed            | 7          |
|                          |     | (b) Give reasons for non-participation at each stage                                                                                                                                                         | n/a        |
|                          |     | (c) Consider use of a flow diagram                                                                                                                                                                           | n/a        |
| Descriptive data         | 14* | (a) Give characteristics of study participants (eg demographic, clinical, social) and information on exposures and potential confounders                                                                     | 7          |
|                          |     | (b) Indicate number of participants with missing data for each variable of interest                                                                                                                          | n/a        |
|                          |     | (c) Summarise follow-up time (eg, average and total amount)                                                                                                                                                  | n/a        |
| Outcome data             | 15* | Report numbers of outcome events or summary measures over time                                                                                                                                               | 7,8,9,10,  |
| Main results             | 16  | (a) Give unadjusted estimates and, if applicable, confounder-adjusted estimates and their precision (eg, 95% confidence interval). Make clear which confounders were adjusted for and why they were included | 8,9, 10    |
|                          |     | (b) Report category boundaries when continuous variables were categorized                                                                                                                                    | 8, 9       |
|                          |     | (c) If relevant, consider translating estimates of relative risk into absolute risk for a meaningful time period                                                                                             | n/a        |
| Other analyses           | 17  | Report other analyses done—eg analyses of subgroups and interactions, and sensitivity analyses                                                                                                               | 8,9,10,    |
| <b>Discussion</b>        |     |                                                                                                                                                                                                              |            |
| Key results              | 18  | Summarise key results with reference to study objectives                                                                                                                                                     | 11, 12,13, |
| <b>Limitations</b>       |     |                                                                                                                                                                                                              |            |
| Interpretation           | 20  | Give a cautious overall interpretation of results considering objectives, limitations, multiplicity of analyses, results from similar studies, and other relevant evidence                                   | 12         |
| Generalisability         | 21  | Discuss the generalisability (external validity) of the study results                                                                                                                                        | 12         |
| <b>Other information</b> |     |                                                                                                                                                                                                              |            |
| Funding                  | 22  | Give the source of funding and the role of the funders for the present study and, if applicable, for the original study on which the present article is based                                                | 14         |

\*Give information separately for cases and controls in case-control studies and, if applicable, for exposed and unexposed groups in cohort and cross-sectional studies.

**Note:** An Explanation and Elaboration article discusses each checklist item and gives methodological background and published examples of transparent reporting. The STROBE checklist is best used in conjunction with this article (freely available on the Web sites of PLoS Medicine at <http://www.plosmedicine.org/>, Annals of Internal Medicine at <http://www.annals.org/>, and Epidemiology at <http://www.epidem.com/>). Information on the STROBE Initiative is available at [www.strobe-statement.org](http://www.strobe-statement.org).

# BMJ Open

## Exploring geographic variation in acute appendectomy in Ireland: a cohort study

|                                 |                                                                                                                                                                                                                                |
|---------------------------------|--------------------------------------------------------------------------------------------------------------------------------------------------------------------------------------------------------------------------------|
| Journal:                        | <i>BMJ Open</i>                                                                                                                                                                                                                |
| Manuscript ID                   | bmjopen-2018-025231.R2                                                                                                                                                                                                         |
| Article Type:                   | Research                                                                                                                                                                                                                       |
| Date Submitted by the Author:   | 02-Jul-2019                                                                                                                                                                                                                    |
| Complete List of Authors:       | Ahmed, O; Wexford General Hospital, General Surgery<br>Mealy, Ken; Wexford General Hospital, General and Colorectal Surgery<br>Sorensen, Jan; Royal College of Surgeons in Ireland, Health Outcomes Research Centre            |
| <b>Primary Subject Heading</b>: | Health services research                                                                                                                                                                                                       |
| Secondary Subject Heading:      | Surgery, Health policy, Paediatrics, Public health                                                                                                                                                                             |
| Keywords:                       | Health policy < HEALTH SERVICES ADMINISTRATION & MANAGEMENT, Organisation of health services < HEALTH SERVICES ADMINISTRATION & MANAGEMENT, PUBLIC HEALTH, Paediatric surgery < SURGERY, Adult surgery < SURGERY, appendicitis |
|                                 |                                                                                                                                                                                                                                |

SCHOLARONE™  
Manuscripts

# Exploring geographic variation in acute appendectomy in Ireland: a cohort study

Authors:

Ola Ahmed, Ken Mealy, Jan Sorensen

1. Department of General Surgery, Wexford General Hospital, Wexford, Ireland  
Ms Ola Ahmed  
Trainee Surgeon
2. National Clinical Programme in Surgery, Royal College of Surgeons in Ireland, Dublin 2, Ireland; Department of General Surgery, Wexford General Hospital, Wexford, Ireland  
Mr Ken Mealy  
Consultant Surgeon
3. Healthcare Outcomes Research Centre, Royal College of Surgeons in Ireland, Dublin 2, Ireland  
Professor Jan Sorensen  
Director of the Healthcare Outcomes Research Centre

**Correspondence to:** Ms Ola Ahmed, Department of General Surgery, Wexford General Hospital, Wexford, Ireland

**Email:** [olasdahmed@gmail.com](mailto:olasdahmed@gmail.com)

**Word count:** 3132

### Strengths and limitations of this study

- The study employed a large, well-defined patient population of the Republic of Ireland.
- All data was age and gender standardised as is standard when analysing geographical variation in healthcare, including the Dartmouth Atlas Project.
- The study does not include data from private hospitals, however acute appendicitis is largely managed in public hospitals regardless of medical insurance cover.
- Co-morbidities, procedural complexity and socioeconomic status were not controlled for when assessing patient characteristics.
- Future studies should expand on this study design and additional examination of regional and local variations perhaps in a risk adjusted setting should be a priority.

**Abstract**

**Objective** To explore geographic variations in Irish laparoscopic and open appendectomy procedures.

**Design** Analysis based on 2014-2017 administrative hospital data from public hospitals.

**Setting** Counties of the Republic of Ireland.

**Participants** Irish residents with hospital admissions for an appendectomy as the principal procedure.

**Main outcome measures** Age and gender standardised laparoscopic and open appendectomy rates for 26 counties. Geographic variation measured with the extremal quotient (EQ), coefficient of variation (CV) and the systematic component of variation (SCV).

**Results** 23,684 appendectomies were included. 77.6% (n= 18,387) were performed laparoscopically. An EQ of 8.3 for laparoscopy and 10.0 for open appendectomy was determined. A high CV was demonstrated with a value of 36.7 and 80.8 for laparoscopic and open appendectomy. A SCV of 14.2 and 124.8 for laparoscopic and open appendectomy was observed. A wider variation was determined when children and adults were assessed separately.

**Conclusions** The geographic distribution in rates of appendectomy varies considerably across Irish counties. Our data suggests that a patient's likelihood of undergoing a laparoscopic or open appendectomy is associated with their county of residence.

## Introduction

Acute appendicitis continues to be a global disease with escalating incidence rates in rapidly developing and industrialised countries<sup>1</sup>. These epidemiological associations contribute to the evolving knowledge on the pathogenesis of acute appendicitis and the influences of environmental triggers<sup>2,3</sup>. Modern advances in laparoscopic surgery over the past two decades have led to the demonstrable advantage of laparoscopic appendectomy over open techniques across all populations<sup>4-6</sup>. Laparoscopy is associated with shorter hospital length of stay, decreased analgesic requirements, and lower morbidity rates in comparison with open surgery<sup>4,7,8</sup>. However, while laparoscopic approaches are preferred in most instances, open appendectomy is still practiced in cases where laparoscopy is difficult or contraindicated.

Analysing regional variations in the provision of common procedures helps raise questions relating to service provision as well as identify opportunities for improving efficiency and observing best practice. The Dartmouth Atlas Project has shown wide variations of up to 10-fold for a multitude of surgical procedures across geographical sites in the United States<sup>9</sup>. This initiative has led to several studies of geographic variation in other countries which appear to demonstrate that a patient's likelihood of undergoing specific surgical procedures depends greatly on where they live<sup>10-13</sup>.

Reasons for the regional variability of laparoscopic and open appendectomy are still unclear. The observed rates of open appendectomy vary widely in the literature from 6 – 35% with higher variations in the adult population<sup>14-16</sup>. The aim of this study was to systematically investigate the regional variation of the surgical care of acute appendicitis in the Republic of Ireland. We compare the national data of laparoscopic and open appendectomy rates for children and adults to provide a current view of regional variation rates. By analysing and comparing the patterns of utilisation of both the adult and paediatric population in Ireland, we seek to understand the extent that area of residence may influence the likelihood of undergoing either a laparoscopic or open procedure.



## Methods

### Data extraction

Anonymised patient data were obtained for a 4-year period from 2014 to 2017 from the National Quality Assurance and Improvement System (NQAIS). NQAIS is an online application based on the Hospital Inpatient Enquiry system (HIPE) operated by the national Health Service Executive in Ireland. Established in 1971, HIPE collects clinical and administrative data on discharges from acute Irish public hospitals. A HIPE record is created following a patient's discharge from a public hospital and offers demographic and clinical information for the episode of care. The current HIPE system only holds data for public hospitals and no national database is available on the activities in the private hospital sector. This analysis includes only patients treated in public hospitals regardless of their individual insurance status. We obtained records of all hospital episodes coded with laparoscopic appendectomy or open appendectomy as the primary procedure. From this sample we excluded episodes with primary diagnostic codes different from "Appendicitis", "Suspected appendicitis", or "Rule-out appendicitis" (i.e. not coded with K35-37 in the International Classification of Diseases Version 10 Clinical Modification (ICD-10-CM)), episodes coded as non-emergency admissions, and episodes for patients who are not residents in Ireland.

The Republic of Ireland is made up of 26 geographical subdivisions referred to as counties. These counties were used in this study to determine appendectomy rates per geographical area. County of residence is a variable in HIPE which can be utilised to determine residential status of individual persons irrespective of where the actual procedure was performed. We obtained population statistics from the 2016 census from the Central Statistical Office<sup>17</sup>.

Patient factors considered in the analysis were age, gender and county of residence. Children were categorized as patients aged 14 years or younger to correspond with the 5-year age groups in the

1  
2  
3 available census data. National age and gender stratification was derived from the population of  
4  
5 4,761,865 referred to in the 2016-population census<sup>17</sup>.  
6  
7

### 8 **Statistical analysis**

9  
10  
11 Data was analysed using Stata version 15.1 (StataCorp, Texas). Descriptive statistics were recorded  
12  
13 for patient characteristics and procedure type. Continuous variables were compared using unpaired  
14  
15 t-tests. Association of categorical variables (differences for dichotomous variables between groups)  
16  
17 was assessed using the chi-square ( $X^2$ ) test. Continuous numerical variables were reported as means  
18  
19 and standard deviations (SD). Categorical variables were reported as proportions or percentages.  
20  
21

22  
23 To assess relative variability we used methods described by McPhearson and colleagues<sup>12</sup>. These  
24  
25 established methods of geographic variation are widely used in small-area variation studies and  
26  
27 allow for context and comparison across geographical settings and countries<sup>13, 18, 19</sup>. The extremal  
28  
29 quotient (EQ) is presented as the ratio of the highest and lowest standardised county rate. A value  
30  
31 close to 1 indicates low variation in rates across counties. The coefficient of variation (CV) is a  
32  
33 measure of relative variability and is calculated as the standard deviation of the county rates divided  
34  
35 by the mean of county rates. A value greater than 0.3 is considered “highly variable” in accordance  
36  
37 to studies by McPhearson et al with higher scores indicating greater variability<sup>12, 20</sup>. The systematic  
38  
39 component of variation (SCV) is also a measure of variation. This is the difference between the  
40  
41 random component of variation and the total variation. Homogeneity in rates between areas would  
42  
43 result in a value of zero. A large SCV value indicates large systematic and regional variation<sup>12</sup>. We  
44  
45 estimated these variability measures for the whole population and for children and adults  
46  
47 separately.  
48  
49  
50

### 51 **Patient involvement**

52  
53 No patients were involved in setting the research question or the outcome measures, nor were they  
54  
55 involved in the development of design or implementation of the study. No patients were asked to  
56  
57 advise on interpretation or writing up of results.  
58  
59  
60

## Results

### National analysis

A total of 26,760 episodes of care discharged through January 1<sup>st</sup> 2014 to December 31<sup>st</sup> 2017 were extracted. In this sample 1902 episodes were coded with diagnoses other than K35-K37; 885 episodes were coded as non-emergency admissions; 289 episodes related to non-Ireland residents. After exclusion of these episodes, our study sample included 23,684 episodes of care of which 77.6% were laparoscopic appendectomies and 22.4% were open appendectomies. 53.7% of patients were male and the mean age was 25 years (SD 15, median 20, range 0-98). These findings are summarized in Table 1.

**Table 1** Number of adult and paediatric laparoscopic and open appendectomy

|                          | Laparoscopic (n (%)) | Open (n (%)) | P value |
|--------------------------|----------------------|--------------|---------|
| <b>Children (n=7343)</b> |                      |              |         |
| Male                     | 2068 (28.2%)         | 2140 (29.1%) |         |
| Female                   | 1790 (24.4%)         | 1345 (18.3%) | <0.01   |
| <b>Adult (n=16341)</b>   |                      |              |         |
| Male                     | 7387 (45.2%)         | 1126 (6.9%)  |         |
| Female                   | 7142 (43.7%)         | 686 (4.2%)   | <0.01   |

The percentage of laparoscopic procedures was 52.6% among children and 88.9% among adults (statistically significant difference; OR 7.2 95% CI 6.8-7.7). Figure 1 displays the proportion of appendectomies conducted as laparoscopic procedures for 2014 to 2017 in children and adult patients. The proportion of laparoscopic procedures increased steadily during the studied years from 2014 to 2017 from 72.7% to 83.3% (trend  $p < 0.01$ ). For children the proportion increased from 43.9% to 61.4% (trend  $p < 0.01$ ).

Girls were more likely to have laparoscopic procedures than boys (57.1% vs 49.1%, OR 1.4 95% CI 1.3-1.5), and women more likely than men (91.2% vs 86.8%, OR 1.6 95% CI 1.4-1.8). A clear age gradient was observed when comparing laparoscopic and open appendectomy procedures for the whole population and for both men and women separately (trend  $p < 0.01$ ). The proportion of

1  
2  
3 patients undergoing laparoscopic procedures reduced for older patients in both genders (logistic  
4 regression  $p < 0.01$ ) and appears statistically lower for patients older than 45 years ( $p < 0.01$ ).  
5  
6  
7

### 8 **County analysis**

9  
10 Figure 2 displays the number of laparoscopic and open procedures performed on children and adults  
11 during the years 2014 to 2017 by county of residence. The annual appendectomy rate was estimated  
12 at 124.4 procedures per 100,000 persons and 96.5 and 27.8 for laparoscopic and open approaches  
13 respectively. The online supplementary table shows the proportion of laparoscopic appendectomies  
14 per year by county of residence for the child and adult population. The data displays a gradual  
15 increase in the number of laparoscopic procedures performed in both patient groups during the 4-  
16 year study period.  
17  
18  
19  
20  
21  
22  
23  
24  
25

26 Figure 3 presents the ratio of the observed and expected number of the total appendectomy rates  
27 within different counties for both children and adults and displays the geographic dispersions  
28 determined. The expected number of procedures was estimated by relating the national age and  
29 gender procedure rate to the county population and demonstrates the inter-county discrepancies in  
30 a risk adjusted setting. A value of 1 was determined to be the national average rate to allow for  
31 comparison between geographic areas. The ratio takes a value larger than 1 when the numbers of  
32 observed procedures are higher than the expected number of procedures. This would indicate a high  
33 volume county when compared with the national average value. For children, 17/26 counties  
34 displayed a higher than average rate of appendectomy procedures. For the adult population,  
35 residents from 20/26 counties underwent appendectomy procedures at a higher rate than the  
36 national average.  
37  
38  
39  
40  
41  
42  
43  
44  
45  
46  
47  
48  
49  
50

51 Figure 4 presents the association between the ratio of observed and expected procedures for  
52 children and adults. Counties in the north-east quadrant have a higher than expected number of  
53 procedures for both children and adults. These counties demonstrate higher rates of appendectomy  
54 procedures for their entire populations. There appears to be a strong association between the ratio  
55  
56  
57  
58  
59  
60

1  
2  
3 for children and adults indicating that counties with a higher ratio for children also have a higher  
4  
5 ratio for adults. Counties in the south-west quadrant have a lower than expected number of  
6  
7 procedures for both children and adults. Using similar reasoning, counties with lower rates of  
8  
9 paediatric appendectomy procedures appeared to have low rates for the adult population also. Only  
10  
11 four counties have a different pattern. Roscommon is the only county where children have more  
12  
13 than the expected episodes of care and adults have fewer than the expected episodes of care, while  
14  
15 the reverse appears for Kilkenny, Waterford, Donegal and Kildare. These remaining four counties  
16  
17 display high rates in the adult population but lower than average rates in the paediatric patient  
18  
19 group.  
20  
21  
22

23  
24 Figure 5 displays the ratio of observed and expected procedures for laparoscopic and open  
25  
26 procedures for children and adults separately. Wide population dispersions are demonstrated in  
27  
28 children for both laparoscopic and open appendectomy. In 16/26 counties children underwent  
29  
30 laparoscopic appendectomy at rates higher than the national average, indicating areas with high  
31  
32 utilisation. Children from 13/26 counties underwent higher rates of open appendectomy procedures  
33  
34 than the rest of the general population. Similarly, adults in 16/26 counties had higher rates of  
35  
36 laparoscopic procedures than the rest of the national population, and adults from 12/26 counties  
37  
38 underwent higher rates of open appendectomy procedures. Wide dispersions are particularly  
39  
40 evident in the adult population with open appendectomy.  
41  
42  
43

44  
45 Table 2 displays the statistical measures of variation for the combined population and children and  
46  
47 adults separately. The extremal quotient was 8.3 for laparoscopic and 10.0 for open appendectomy,  
48  
49 demonstrating greater geographic variation for open appendectomy. The coefficient of variation was  
50  
51 high for both laparoscopic and open appendectomy; 36.7 for laparoscopic and 80.8 for open  
52  
53 procedures, in accordance with the McPhearson interpretations<sup>12</sup>. This demonstrates greater  
54  
55 geographic variability in the application of open appendectomy cases. The systematic component of  
56  
57 variation was also high for both procedures; 14.2 for laparoscopy and 124.8 for open appendectomy.  
58  
59  
60

**Table 2.** Variation statistics for laparoscopy, open and combined for children, adult and the whole patient population, 2014-2017.

| Population/procedure    | Number of episodes 2014-2017 | Standardised number of episodes per 100.000 population | Extremal Quotient | Coefficient of Variation | Systematic Component of Variation |
|-------------------------|------------------------------|--------------------------------------------------------|-------------------|--------------------------|-----------------------------------|
| <b>Children</b>         |                              |                                                        |                   |                          |                                   |
| Laparoscopy             | 3858                         | 383.3                                                  | 16.9              | 55.1                     | 41.6                              |
| Open                    | 3485                         | 346.2                                                  | 6.5               | 55.3                     | 38.2                              |
| Combined                | 7343                         | 729.5                                                  | 3.2               | 24.3                     | 9.3                               |
| <b>Adult</b>            |                              |                                                        |                   |                          |                                   |
| Laparoscopy             | 14529                        | 386.9                                                  | 7.1               | 33.3                     | 10.6                              |
| Open                    | 1812                         | 48.3                                                   | 25.7              | 128.4                    | 502.0                             |
| Combined                | 16341                        | 435.1                                                  | 2.1               | 18.9                     | 4.5                               |
| <b>Whole population</b> |                              |                                                        |                   |                          |                                   |
| Laparoscopy             | 18387                        | 386.1                                                  | 8.3               | 36.7                     | 14.2                              |
| Open                    | 5297                         | 111.2                                                  | 10.0              | 80.8                     | 124.8                             |
| Combined                | 23684                        | 497.4                                                  | 2.2               | 19.6                     | 5.6                               |

Extremal quotient =  $\max(\text{standardised episode rate } i) / \min(\text{standardised episode rate } i)$ .

Coefficient of variation =  $\text{standard deviation (standardised episode rate } i) / \text{mean (standardised episode rate } i) * 100$ .

Systematic component of variations =  $1/k ( \sum (O_i - E_i)^2 / E_i^2 - \sum 1/E_i ) * 100$  where k is number of counties,  $O_i$  is observed number of episodes and  $E_i$  is expected number of episodes determined by indirect standardisation.

## Discussion

This study documents a substantial geographic variation in the operative management of acute appendicitis in the Republic of Ireland. To our knowledge, there have been no population-based studies exploring emergency appendectomy variations at a county level in Ireland. While some level of disparity is to be expected, large variations particularly in emergency interventions can indicate potential inequity and inefficiency in the use of sophisticated healthcare systems, and thus indicate variations in access and use of surgical services. Similar to the Dartmouth Atlas project, our data demonstrates that a person's likelihood of undergoing a laparoscopic or open appendectomy is related to their county of residence<sup>9</sup>.

Laparoscopic appendectomy is favoured because of its benefits in analgesic requirements post-operatively, shorter length of hospital stay, lower post-operative mortality, and faster return to normal activities<sup>4, 7, 8, 21, 22</sup>. Unsurprisingly, most of the cases in our data were performed laparoscopically. As with most observational data, causality cannot be determined. Historical research suggests that the variations in the utility of surgical services may result from clinical uncertainty or heterogeneity in medical literature<sup>23, 24</sup>. One potential hypothetical and important reason for the variations could be individual surgeon skill and practice. The current study did not control for specific surgeon factors and may reflect a lack of laparoscopic skills or capacity in certain areas and explain the higher statistical variability for open procedures. Variations in laparoscopic surgery rates are not unheard of. An analyses by Doumouras et al suggested that laparoscopic training may influence the rate of laparoscopic practices in some hospitals<sup>25</sup>. While our study did not evaluate larger teaching hospitals separately, there may be an inherent geographic variation in laparoscopic expertise outside of tertiary referral centres and may also reflect variation in consultant and trainee surgeon performance as the principle operator; a factor not examined in this study.

In this study laparoscopic appendectomy utilisation appears lower in children and may indicate a deficiency in the paediatric surgery skillset available in the country and an unfamiliarity in operating on children amongst general surgeons. Multiple reports have stressed the need to provide high

1  
2  
3 quality paediatric surgery services to address the challenges and demands of paediatric patients  
4  
5 which may be unavailable in hospitals where adult surgery appears to dominate. The findings of this  
6  
7 study suggest a potential difference in expertise in relation to paediatric surgery in Ireland. This  
8  
9 would parallel with the reality that most district or general hospitals in Ireland lack a specialised  
10  
11 paediatric surgeon on site and thus cases are performed by adult surgeons. These findings suggest a  
12  
13 potential difference in expertise in relation to paediatric surgery in Ireland.  
14  
15

16  
17 There are some limitations to this study. As with other studies including data from administrative  
18  
19 databases, the reliability of results is based on the accuracy and completeness of systematic coding  
20  
21 and data input. We attempt to overcome potential miscoding information by including a large  
22  
23 population cohort of patients over a four-year period. We have not accounted for laparoscopic cases  
24  
25 that were converted to open due to the potential inclusion of duplicate numbers and inherent  
26  
27 miscoding errors. Co-morbidities, procedural complexity and socioeconomic status were also not  
28  
29 controlled for when assessing patient characteristics. However, despite these limitations our findings  
30  
31 demonstrate concerning conclusions relating to the provision of emergency appendectomy in the  
32  
33 Republic of Ireland for both children and adults. The analysis provides some important implications  
34  
35 for health care providers and surgeons in analysing the extent of geographic variation and the  
36  
37 disparity in management of a common condition. While we cannot explain the wide variations seen,  
38  
39 further analysis at an individual county level with the assessment of more in-depth patient  
40  
41 characteristics may uncover opportunities to eliminate variations and ultimately improve the  
42  
43 delivery of care and patient outcomes. We also await the results of the multi-institutional Right Iliac  
44  
45 Fossa Treatment (RIFT audit) study to further analyse the variation in the management strategies of  
46  
47 patients presenting with RIF pain to centres across the United Kingdom, Ireland, Italy, Portugal and  
48  
49 Spain<sup>26</sup>.  
50  
51  
52  
53  
54  
55  
56  
57  
58  
59  
60



## Conclusion

Geographic variation analyses can help characterise the overall performance of a health system and determine whether patients receive equal treatment for equal needs. This is the first Irish study to systematically explore the rates and geographical disparity of acute laparoscopic and open appendectomy procedures and help bridge a pre-existing knowledge gap on the topic. The high appendectomy rates seen in several counties in this study may suggest an imbalance in the provision of a common acute surgical procedure in the Republic of Ireland. Some populations appear more likely to undergo laparoscopic procedures than other populations with considerable geographical disparity observed within a relatively small country. Large statistical variability in the paediatric population may also reflect a discrepancy in surgical paediatric care in areas where these procedures are largely performed by surgeons specialising in adult care. Based on these results, we recommend future studies to focus on the practicality of this and further analysis into the structure of emergency paediatric surgery particularly in district hospitals. Despite the limitations, our study suggests a need for more effective decision-making and planning to ensure consistency and decrease the variability in the management of acute appendicitis.

1  
2  
3 **Contributors:** OA conceived and designed the study, analysed the data and drafted and revised the  
4 paper. JS designed the study, prepared and analysed the data, drafted and revised the paper. KM  
5 interpreted the results and revised the paper. All authors had full access to all the data (including  
6 statistical reports and tables) in the study and can take responsibility for the integrity of the data and  
7 the accuracy of the data analysis. OA is the guarantor and affirms that the manuscript is an honest,  
8 accurate, and transparent account of the study being reported; that no important aspects of the  
9 study have been omitted; and that any discrepancies from the study as originally planned (and, if  
10 relevant, registered) have been explained.  
11  
12  
13  
14  
15  
16  
17  
18  
19  
20

21 **Funding:** This research received no specific grant from any funding agency in the public, commercial  
22 or not-for-profit sectors.  
23  
24  
25

26 **Competing interests:** All authors declare no conflicts in interests in the preparation of this study and  
27 declare: no support from any organisation for the submitted work; no financial relationships with  
28 any organisations that might have an interest in the submitted work in the previous three years; no  
29 other relationships or activities that could appear to have influenced the submitted work.  
30  
31  
32  
33  
34  
35

36 **Ethical approval:** Ethics board approval was not required for the study.  
37  
38

39 **Data sharing:** All data has been included either in the main manuscript or as a supplementary file.  
40 The authors do not withhold any other data.  
41  
42  
43

#### 44 **Acknowledgments**

45  
46  
47 The authors acknowledge the Healthcare Pricing Office as the source of HIPE (Hospital In-Patient  
48 Enquiry) data which is utilised in NQAIS Clinical. The authors also acknowledge the Clinical Leads of  
49 the National Clinical Programme in Surgery, the NQAIS Clinical Steering Group, the HORC-NCP  
50 research group, and the Acute Hospital Division (HSE) for providing access to NQAIS Clinical.  
51  
52  
53  
54  
55  
56  
57  
58  
59  
60

## References

1. Ferris M, Quan S, Kaplan BS, Molodecky N, Ball CG, Chernoff GW, et al. The Global Incidence of Appendicitis: A Systematic Review of Population-based Studies. *Annals of surgery* 2017;**266**(2): 237-241.
2. Kaplan GG, Dixon E, Panaccione R, Fong A, Chen L, Szyszkowicz M, et al. Effect of ambient air pollution on the incidence of appendicitis. *Canadian Medical Association Journal* 2009;**181**(9): 591-597.
3. Kaplan GG, Tanyingoh D, Dixon E, Johnson M, Wheeler AJ, Myers RP, et al. Ambient ozone concentrations and the risk of perforated and nonperforated appendicitis: a multicity case-crossover study. *Environmental health perspectives* 2013;**121**(8): 939.
4. Tate JJT, Dawson JW, Chung SCS, Lau WY, Li AKC. Laparoscopic versus open appendectomy: prospective randomised trial. *The Lancet* 1993;**342**(8872): 633-637.
5. Southgate E, Vousden N, Karthikesalingam A, Markar SR, Black S, Zaidi A. Laparoscopic vs open appendectomy in older patients. *Archives of Surgery* 2012;**147**(6): 557-562.
6. Adwan H, Weerasuriya CK, Endleman P, Barnes A, Stewart L, Justin T. Laparoscopic versus open appendectomy in children: A UK District General Hospital experience. *Journal of Pediatric Surgery* 2014;**49**(2): 277-279.
7. Thomson J-E, Kruger D, Jann-Kruger C, Kiss A, Omoshoro-Jones J, Luvhengo T, et al. Laparoscopic versus open surgery for complicated appendicitis: a randomized controlled trial to prove safety. *Surgical endoscopy* 2015;**29**(7): 2027-2032.
8. Tiwari MM, Reynoso JF, Tsang AW, Oleynikov D. Comparison of outcomes of laparoscopic and open appendectomy in management of uncomplicated and complicated appendicitis. *Annals of surgery* 2011;**254**(6): 927-932.
9. Practice TDloHPaC. The Dartmouth Atlas Project Database. 1996 - 2010.
10. Reames BN, Shubeck SP, Birkmeyer JD. Strategies for Reducing Regional Variation in the Use of Surgery A Systematic Review. *Annals of surgery* 2014;**259**(4): 616.
11. Ahmed O, Mealy K, Kelliher G, Keane F, Sorensen J. Exploring geographical variation in access to general surgery in Ireland: Evidence from a national study. *The Surgeon* 2019.
12. McPherson K, Wennberg JE, Hovind OB, Clifford P. Small-area variations in the use of common surgical procedures: an international comparison of New England, England, and Norway. *New England journal of medicine* 1982;**307**(21): 1310-1314.
13. Weeks WB, Paraponaris A, Ventelou B. Geographic variation in rates of common surgical procedures in France in 2008–2010, and comparison to the US and Britain. *Health Policy* 2014;**118**(2): 215-221.
14. Katsuno G, Nagakari K, Yoshikawa S, Sugiyama K, Fukunaga M. Laparoscopic Appendectomy for Complicated Appendicitis: A Comparison with Open Appendectomy. *World Journal of Surgery* 2009;**33**(2): 208-214.
15. Masoomi H, Mills S, Dolich MO, Ketana N, Carmichael JC, Nguyen NT, et al. Comparison of Outcomes of Laparoscopic Versus Open Appendectomy in Adults: Data from the Nationwide Inpatient Sample (NIS), 2006–2008. *Journal of Gastrointestinal Surgery* 2011;**15**(12): 2226-2231.
16. Litz CN, Ciesla DJ, Danielson PD, Chandler NM. Effect of hospital type on the treatment of acute appendicitis in teenagers. *Journal of Pediatric Surgery* 2018;**53**(3): 446-448.
17. Scoreboard MIP. Central Statistics Office statistical release. In: June; 2015.
18. Appleby J, Raleigh V, Frosini F, Bevan G, Gao H, Lyscom T. *Variations in health care: the good, the bad and the inexplicable*. King's Fund, 2011.
19. Birkmeyer JD, Reames BN, McCulloch P, Carr AJ, Campbell WB, Wennberg JE. Understanding of regional variation in the use of surgery. *The Lancet* 2013;**382**(9898): 1121-1129.
20. Chassin MR, Brook RH, Park RE, Keesey J, Fink A, Kosecoff J, et al. *Variations in the use of medical and surgical services by the Medicare population*. Rand, 1986.

- 1  
2  
3 21. Sauerland S, Jaschinski T, Neugebauer EAM. Laparoscopic versus open surgery for suspected  
4 appendicitis. *Cochrane Database of Systematic Reviews* 2010(10).  
5  
6 22. Faiz O, Clark J, Brown T, Bottle A, Antoniou A, Farrands P, et al. Traditional and laparoscopic  
7 appendectomy in adults: outcomes in English NHS hospitals between 1996 and 2006. *Annals of*  
8 *surgery* 2008;**248**(5): 800-806.  
9  
10 23. Ray-Coquard I, Philip T, Lehmann M, Fervers B, Farsi F, Chauvin F. Impact of a clinical  
11 guidelines program for breast and colon cancer in a French cancer center. *Jama* 1997;**278**(19): 1591-  
12 1595.  
13  
14 24. Wennberg JE. Dealing with medical practice variations: a proposal for action. *Health Affairs*  
15 1984;**3**(2): 6-33.  
16  
17 25. Doumouras AG, Saleh F, Eskicioglu C, Amin N, Cadeddu M, Hong D. Neighborhood variation  
18 in the utilization of laparoscopy for the treatment of colon cancer. *Diseases of the Colon & Rectum*  
19 2016;**59**(8): 781-788.  
20  
21 26. Right Iliac Fossa Pain Treatment (RIFT) Study: protocol for an international, multicentre,  
22 prospective observational study. *BMJ open* 2018;**8**(1): e017574.  
23  
24  
25  
26  
27  
28  
29  
30  
31  
32  
33  
34  
35  
36  
37  
38  
39  
40  
41  
42  
43  
44  
45  
46  
47  
48  
49  
50  
51  
52  
53  
54  
55  
56  
57  
58  
59  
60

1  
2  
3 **Figure legend:**  
4

5 **Figure 1** - Proportion of appendectomies conducted as laparoscopic procedures during 2014-2017 in  
6 children and adult patients  
7

8  
9  
10 **Figure 2** – Number of procedures performed during 2014-2017 on county residents  
11

12  
13 **Figure 3** - Ratio of observed/expected number of episodes of appendectomy by county for children  
14 and adults.  
15

16  
17  
18 **Figure 4** - Association between children and adult's ratio of observed/expected number of episodes  
19 of appendectomy by county.  
20

21  
22  
23 **Figure 5** - Ratio of observed/expected number of episodes of laparoscopy and open appendectomy  
24 by county for children and adults.  
25

26  
27  
28 **Table 1** – Adult and paediatric laparoscopic and open appendectomy percentage rates..  
29

30  
31 **Table 2** – Variation statistics for laparoscopy, open and combined for children, adult and the whole  
32 patient population, 2014-2017.  
33

34  
35  
36 **Online supplementary table** – Proportion of laparoscopic appendectomies per year by county of  
37 residence for child and adult population.  
38  
39  
40  
41  
42  
43  
44  
45  
46  
47  
48  
49  
50  
51  
52  
53  
54  
55  
56  
57  
58  
59  
60

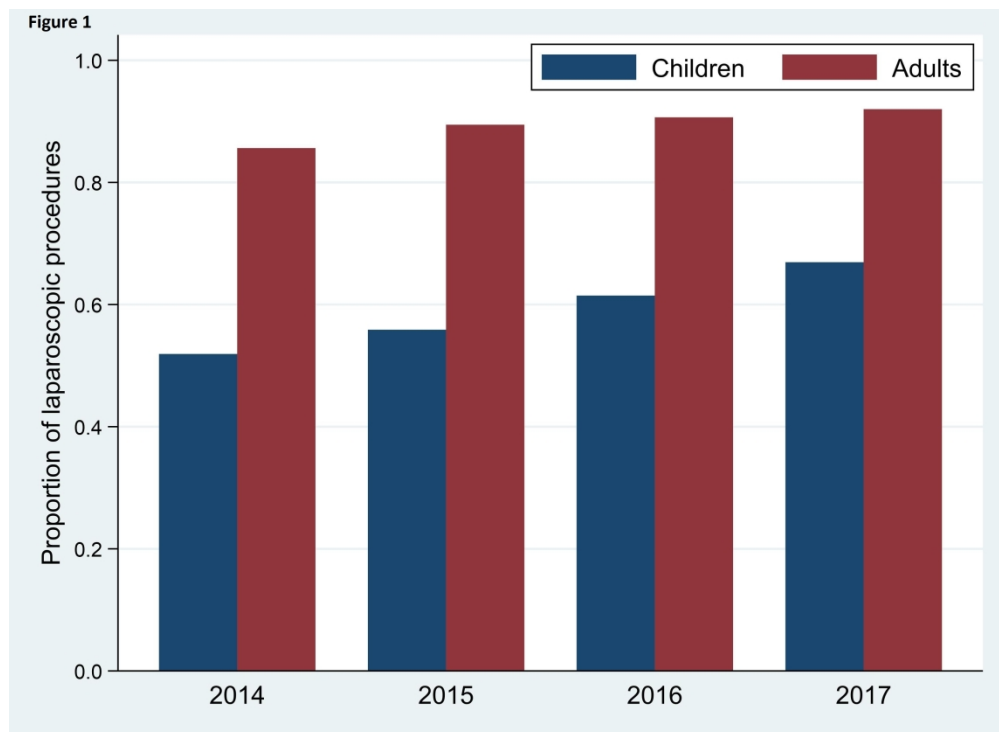

Proportion of appendectomies conducted as laparoscopic procedures during 2014-2017 in children and adult patients

279x203mm (300 x 300 DPI)

1  
2  
3  
4  
5  
6  
7  
8  
9  
10  
11  
12  
13  
14  
15  
16  
17  
18  
19  
20  
21  
22  
23  
24  
25  
26  
27  
28  
29  
30  
31  
32  
33  
34  
35  
36  
37  
38  
39  
40  
41  
42  
43  
44  
45  
46  
47  
48  
49  
50  
51  
52  
53  
54  
55  
56  
57  
58  
59  
60

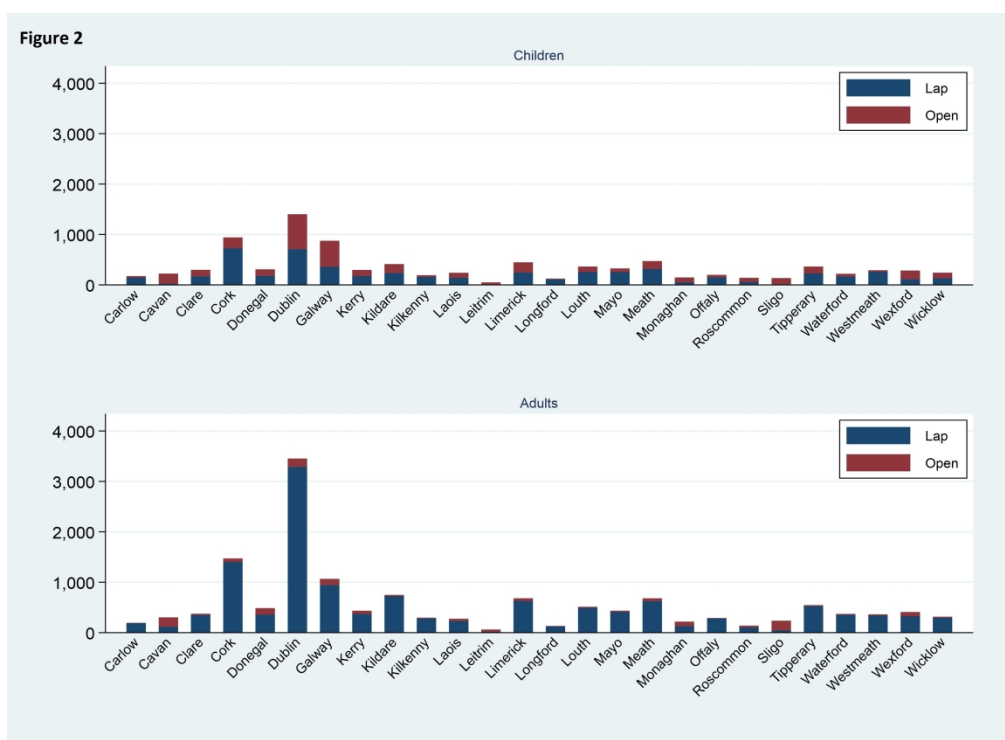

Number of procedures performed during 2014-2017 on county residents

279x203mm (300 x 300 DPI)

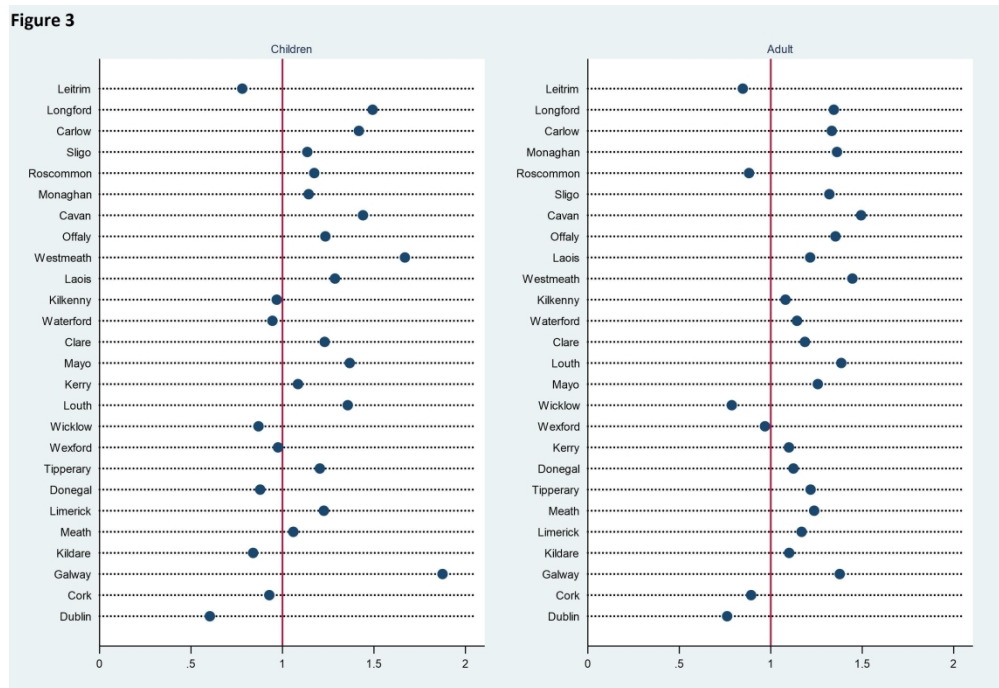

Ratio of observed/expected number of episodes of appendectomy by county for children and adults.

276x190mm (300 x 300 DPI)



1  
2  
3  
4  
5  
6  
7  
8  
9  
10  
11  
12  
13  
14  
15  
16  
17  
18  
19  
20  
21  
22  
23  
24  
25  
26  
27  
28  
29  
30  
31  
32  
33  
34  
35  
36  
37  
38  
39  
40  
41  
42  
43  
44  
45  
46  
47  
48  
49  
50  
51  
52  
53  
54  
55  
56  
57  
58  
59  
60

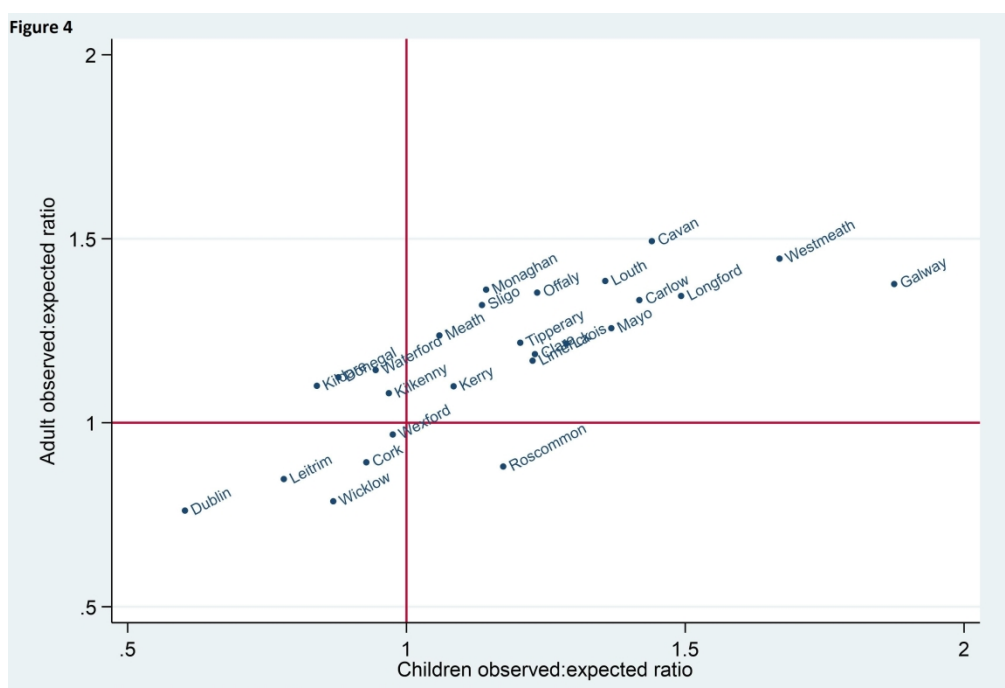

Association between children and adult's ratio of observed/expected number of episodes of appendectomy by county.

279x188mm (300 x 300 DPI)

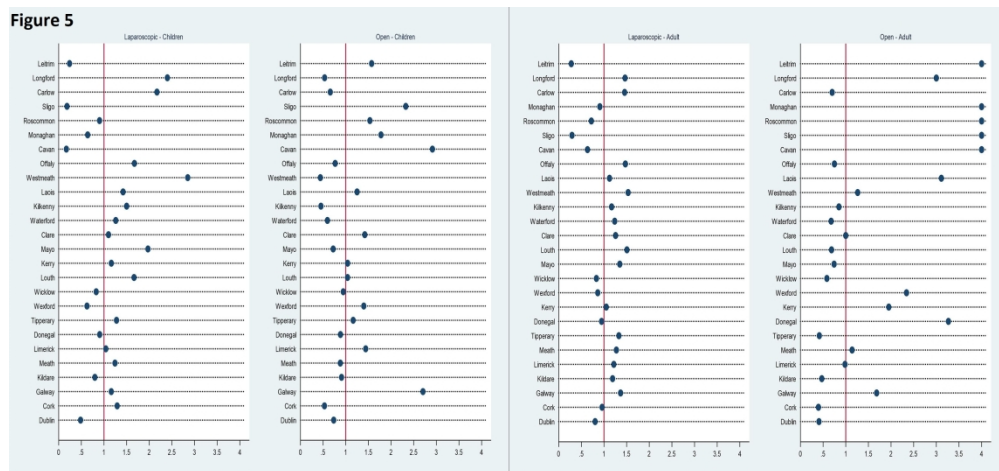

Ratio of observed/expected number of episodes of laparoscopy and open appendectomy by county for children and adults.

279x131mm (300 x 300 DPI)

**Online Supplementary Table** Proportion of laparoscopic appendectomies per year by county of residence for child and adult population

| Proportion of laparoscopic procedures |          |      |      |      |        |      |      |       |
|---------------------------------------|----------|------|------|------|--------|------|------|-------|
| County                                | Children |      |      |      | Adults |      |      |       |
|                                       | 2014     | 2015 | 2016 | 2017 | 2014   | 2015 | 2016 | 2017  |
| Carlow                                | 0.74     | 0.91 | 0.84 | 0.90 | 0.90   | 0.98 | 0.96 | 1.0   |
| Cavan                                 | 0.11     | 0.14 | 0.08 | 0.13 | 0.22   | 0.51 | 0.44 | 0.5   |
| Clare                                 | 0.56     | 0.43 | 0.59 | 0.65 | 0.90   | 0.94 | 0.88 | 0.97  |
| Cork                                  | 0.65     | 0.76 | 0.8  | 0.87 | 0.93   | 0.96 | 0.97 | 0.95  |
| Donegal                               | 0.25     | 0.46 | 0.77 | 0.89 | 0.54   | 0.73 | 0.78 | 0.86  |
| Dublin                                | 0.44     | 0.42 | 0.54 | 0.64 | 0.93   | 0.96 | 0.96 | 0.96  |
| Galway                                | 0.39     | 0.41 | 0.38 | 0.47 | 0.86   | 0.89 | 0.89 | 0.90  |
| Kerry                                 | 0.46     | 0.66 | 0.71 | 0.60 | 0.80   | 0.85 | 0.92 | 0.90  |
| Kildare                               | 0.49     | 0.62 | 0.64 | 0.56 | 0.97   | 0.97 | 0.98 | 0.98  |
| Kilkenny                              | 0.75     | 0.84 | 0.82 | 0.89 | 0.89   | 0.93 | 0.95 | 0.99  |
| Laois                                 | 0.47     | 0.45 | 0.64 | 0.81 | 0.80   | 0.78 | 0.79 | 0.96  |
| Leitrim                               | 0.14     | 0.27 | 0.11 | 0.22 | 0.27   | 0.15 | 0.33 | 0.46  |
| Limerick                              | 0.44     | 0.50 | 0.54 | 0.70 | 0.89   | 0.93 | 0.90 | 0.95  |
| Longford                              | 0.70     | 0.97 | 0.90 | 0.93 | 0.90   | 0.93 | 0.92 | 0.92  |
| Louth                                 | 0.66     | 0.61 | 0.78 | 0.77 | 0.96   | 0.97 | 0.93 | 0.96  |
| Mayo                                  | 0.73     | 0.83 | 0.78 | 0.79 | 0.94   | 0.94 | 0.98 | 0.94  |
| Meath                                 | 0.59     | 0.61 | 0.74 | 0.75 | 0.89   | 0.91 | 0.94 | 0.93  |
| Monaghan                              | 0.35     | 0.30 | 0.33 | 0.41 | 0.59   | 0.51 | 0.77 | 0.51  |
| Offaly                                | 0.65     | 0.78 | 0.83 | 0.78 | 0.94   | 0.98 | 1.00 | 0.95  |
| Roscommon                             | 0.42     | 0.39 | 0.50 | 0.47 | 0.69   | 0.68 | 0.75 | 0.865 |
| Sligo                                 | 0.12     | 0.1  | 0.09 | 0.19 | 0.18   | 0.19 | 0.20 | 0.19  |
| Tipperary                             | 0.63     | 0.68 | 0.60 | 0.60 | 0.94   | 0.98 | 0.98 | 0.98  |
| Waterford                             | 0.75     | 0.80 | 0.77 | 0.74 | 0.92   | 0.94 | 0.98 | 0.96  |
| Westmeath                             | 0.86     | 0.84 | 0.92 | 0.92 | 0.89   | 0.96 | 0.96 | 0.97  |
| Wexford                               | 0.25     | 0.19 | 0.53 | 0.52 | 0.68   | 0.67 | 0.82 | 0.93  |
| Wicklow                               | 0.67     | 0.61 | 0.50 | 0.40 | 0.98   | 0.90 | 0.94 | 0.97  |

**STROBE 2007 (v4) Statement—Checklist of items that should be included in reports of *cohort studies***

| Section/Topic                | Item # | Recommendation                                                                                                                                                                       | Reported on page # |
|------------------------------|--------|--------------------------------------------------------------------------------------------------------------------------------------------------------------------------------------|--------------------|
| <b>Title and abstract</b>    | 1      | (a) Indicate the study's design with a commonly used term in the title or the abstract                                                                                               | 1                  |
|                              |        | (b) Provide in the abstract an informative and balanced summary of what was done and what was found                                                                                  | 3                  |
| <b>Introduction</b>          |        |                                                                                                                                                                                      |                    |
| Background/rationale         | 2      | Explain the scientific background and rationale for the investigation being reported                                                                                                 | 4                  |
| Objectives                   | 3      | State specific objectives, including any prespecified hypotheses                                                                                                                     | 4                  |
| <b>Methods</b>               |        |                                                                                                                                                                                      |                    |
| Study design                 | 4      | Present key elements of study design early in the paper                                                                                                                              | 5                  |
| Setting                      | 5      | Describe the setting, locations, and relevant dates, including periods of recruitment, exposure, follow-up, and data collection                                                      | 5                  |
| Participants                 | 6      | (a) Give the eligibility criteria, and the sources and methods of selection of participants. Describe methods of follow-up                                                           | 5                  |
|                              |        | (b) For matched studies, give matching criteria and number of exposed and unexposed                                                                                                  | 5                  |
| Variables                    | 7      | Clearly define all outcomes, exposures, predictors, potential confounders, and effect modifiers. Give diagnostic criteria, if applicable                                             | 5                  |
| Data sources/<br>measurement | 8*     | For each variable of interest, give sources of data and details of methods of assessment (measurement). Describe comparability of assessment methods if there is more than one group | 5                  |
| Bias                         | 9      | Describe any efforts to address potential sources of bias                                                                                                                            | 5                  |
| Study size                   | 10     | Explain how the study size was arrived at                                                                                                                                            | 5                  |
| Quantitative variables       | 11     | Explain how quantitative variables were handled in the analyses. If applicable, describe which groupings were chosen and why                                                         | 5                  |
| Statistical methods          | 12     | (a) Describe all statistical methods, including those used to control for confounding                                                                                                | 6                  |
|                              |        | (b) Describe any methods used to examine subgroups and interactions                                                                                                                  | 6                  |
|                              |        | (c) Explain how missing data were addressed                                                                                                                                          | n/a                |
|                              |        | (d) If applicable, explain how loss to follow-up was addressed                                                                                                                       | n/a                |
|                              |        | (e) Describe any sensitivity analyses                                                                                                                                                | n/a                |
| <b>Results</b>               |        |                                                                                                                                                                                      |                    |

|                          |     |                                                                                                                                                                                                              |            |
|--------------------------|-----|--------------------------------------------------------------------------------------------------------------------------------------------------------------------------------------------------------------|------------|
| Participants             | 13* | (a) Report numbers of individuals at each stage of study—eg numbers potentially eligible, examined for eligibility, confirmed eligible, included in the study, completing follow-up, and analysed            | 7          |
|                          |     | (b) Give reasons for non-participation at each stage                                                                                                                                                         | n/a        |
|                          |     | (c) Consider use of a flow diagram                                                                                                                                                                           | n/a        |
| Descriptive data         | 14* | (a) Give characteristics of study participants (eg demographic, clinical, social) and information on exposures and potential confounders                                                                     | 7          |
|                          |     | (b) Indicate number of participants with missing data for each variable of interest                                                                                                                          | n/a        |
|                          |     | (c) Summarise follow-up time (eg, average and total amount)                                                                                                                                                  | n/a        |
| Outcome data             | 15* | Report numbers of outcome events or summary measures over time                                                                                                                                               | 7,8,9,10,  |
| Main results             | 16  | (a) Give unadjusted estimates and, if applicable, confounder-adjusted estimates and their precision (eg, 95% confidence interval). Make clear which confounders were adjusted for and why they were included | 8,9, 10    |
|                          |     | (b) Report category boundaries when continuous variables were categorized                                                                                                                                    | 8, 9       |
|                          |     | (c) If relevant, consider translating estimates of relative risk into absolute risk for a meaningful time period                                                                                             | n/a        |
| Other analyses           | 17  | Report other analyses done—eg analyses of subgroups and interactions, and sensitivity analyses                                                                                                               | 8,9,10,    |
| <b>Discussion</b>        |     |                                                                                                                                                                                                              |            |
| Key results              | 18  | Summarise key results with reference to study objectives                                                                                                                                                     | 11, 12,13, |
| <b>Limitations</b>       |     |                                                                                                                                                                                                              |            |
| Interpretation           | 20  | Give a cautious overall interpretation of results considering objectives, limitations, multiplicity of analyses, results from similar studies, and other relevant evidence                                   | 12         |
| Generalisability         | 21  | Discuss the generalisability (external validity) of the study results                                                                                                                                        | 12         |
| <b>Other information</b> |     |                                                                                                                                                                                                              |            |
| Funding                  | 22  | Give the source of funding and the role of the funders for the present study and, if applicable, for the original study on which the present article is based                                                | 14         |

\*Give information separately for cases and controls in case-control studies and, if applicable, for exposed and unexposed groups in cohort and cross-sectional studies.

**Note:** An Explanation and Elaboration article discusses each checklist item and gives methodological background and published examples of transparent reporting. The STROBE checklist is best used in conjunction with this article (freely available on the Web sites of PLoS Medicine at <http://www.plosmedicine.org/>, Annals of Internal Medicine at <http://www.annals.org/>, and Epidemiology at <http://www.epidem.com/>). Information on the STROBE Initiative is available at [www.strobe-statement.org](http://www.strobe-statement.org).

# BMJ Open

## Exploring geographic variation in acute appendectomy in Ireland: results from a national registry

|                                 |                                                                                                                                                                                                                                |
|---------------------------------|--------------------------------------------------------------------------------------------------------------------------------------------------------------------------------------------------------------------------------|
| Journal:                        | <i>BMJ Open</i>                                                                                                                                                                                                                |
| Manuscript ID                   | bmjopen-2018-025231.R3                                                                                                                                                                                                         |
| Article Type:                   | Research                                                                                                                                                                                                                       |
| Date Submitted by the Author:   | 10-Jul-2019                                                                                                                                                                                                                    |
| Complete List of Authors:       | Ahmed, O; Wexford General Hospital, General Surgery<br>Mealy, Ken; Wexford General Hospital, General and Colorectal Surgery<br>Sorensen, Jan; Royal College of Surgeons in Ireland, Health Outcomes Research Centre            |
| <b>Primary Subject Heading</b>: | Health services research                                                                                                                                                                                                       |
| Secondary Subject Heading:      | Surgery, Health policy, Paediatrics, Public health                                                                                                                                                                             |
| Keywords:                       | Health policy < HEALTH SERVICES ADMINISTRATION & MANAGEMENT, Organisation of health services < HEALTH SERVICES ADMINISTRATION & MANAGEMENT, PUBLIC HEALTH, Paediatric surgery < SURGERY, Adult surgery < SURGERY, appendicitis |
|                                 |                                                                                                                                                                                                                                |

SCHOLARONE™  
Manuscripts

# Exploring geographic variation in acute appendectomy in Ireland: results from a national registry

Authors:

Ola Ahmed, Ken Mealy, Jan Sorensen

1. Department of General Surgery, Wexford General Hospital, Wexford, Ireland  
Ms Ola Ahmed  
Trainee Surgeon
2. National Clinical Programme in Surgery, Royal College of Surgeons in Ireland, Dublin 2, Ireland; Department of General Surgery, Wexford General Hospital, Wexford, Ireland  
Mr Ken Mealy  
Consultant Surgeon
3. Healthcare Outcomes Research Centre, Royal College of Surgeons in Ireland, Dublin 2, Ireland  
Professor Jan Sorensen  
Director of the Healthcare Outcomes Research Centre

**Correspondence to:** Ms Ola Ahmed, Department of General Surgery, Wexford General Hospital, Wexford, Ireland

**Email:** [olasdahmed@gmail.com](mailto:olasdahmed@gmail.com)

**Word count:** 3132

### Strengths and limitations of this study

- The study employed a large, well-defined patient population of the Republic of Ireland.
- All data was age and gender standardised as is standard when analysing geographical variation in healthcare, including the Dartmouth Atlas Project.
- The study does not include data from private hospitals, however acute appendicitis is largely managed in public hospitals regardless of medical insurance cover.
- Co-morbidities, procedural complexity and socioeconomic status were not controlled for when assessing patient characteristics.
- Future studies should expand on this study design and additional examination of regional and local variations perhaps in a risk adjusted setting should be a priority.



**Abstract**

**Objective** To explore geographic variations in Irish laparoscopic and open appendectomy procedures.

**Design** Analysis based on 2014-2017 administrative hospital data from public hospitals.

**Setting** Counties of the Republic of Ireland.

**Participants** Irish residents with hospital admissions for an appendectomy as the principal procedure.

**Main outcome measures** Age and gender standardised laparoscopic and open appendectomy rates for 26 counties. Geographic variation measured with the extremal quotient (EQ), coefficient of variation (CV) and the systematic component of variation (SCV).

**Results** 23,684 appendectomies were included. 77.6% (n= 18,387) were performed laparoscopically. An EQ of 8.3 for laparoscopy and 10.0 for open appendectomy was determined. A high CV was demonstrated with a value of 36.7 and 80.8 for laparoscopic and open appendectomy. A SCV of 14.2 and 124.8 for laparoscopic and open appendectomy was observed. A wider variation was determined when children and adults were assessed separately.

**Conclusions** The geographic distribution in rates of appendectomy varies considerably across Irish counties. Our data suggests that a patient's likelihood of undergoing a laparoscopic or open appendectomy is associated with their county of residence.

## Introduction

Acute appendicitis continues to be a global disease with escalating incidence rates in rapidly developing and industrialised countries<sup>1</sup>. These epidemiological associations contribute to the evolving knowledge on the pathogenesis of acute appendicitis and the influences of environmental triggers<sup>2,3</sup>. Modern advances in laparoscopic surgery over the past two decades have led to the demonstrable advantage of laparoscopic appendectomy over open techniques across all populations<sup>4-6</sup>. Laparoscopy is associated with shorter hospital length of stay, decreased analgesic requirements, and lower morbidity rates in comparison with open surgery<sup>4,7,8</sup>. However, while laparoscopic approaches are preferred in most instances, open appendectomy is still practiced in cases where laparoscopy is difficult or contraindicated.

Analysing regional variations in the provision of common procedures helps raise questions relating to service provision as well as identify opportunities for improving efficiency and observing best practice. The Dartmouth Atlas Project has shown wide variations of up to 10-fold for a multitude of surgical procedures across geographical sites in the United States<sup>9</sup>. This initiative has led to several studies of geographic variation in other countries which appear to demonstrate that a patient's likelihood of undergoing specific surgical procedures depends greatly on where they live<sup>10-13</sup>. Reasons for the regional variability of laparoscopic and open appendectomy are still unclear. The observed rates of open appendectomy vary widely in the literature from 6 – 35% with higher variations in the adult population<sup>14-16</sup>. The aim of this study was to systematically investigate the regional variation of the surgical care of acute appendicitis in the Republic of Ireland. We compare the national data of laparoscopic and open appendectomy rates for children and adults to provide a current view of regional variation rates. By analysing and comparing the patterns of utilisation of both the adult and paediatric population in Ireland, we seek to understand the extent that area of residence may influence the likelihood of undergoing either a laparoscopic or open procedure.

## Methods

### Data extraction

Anonymised patient data were obtained for a 4-year period from 2014 to 2017 from the National Quality Assurance and Improvement System (NQAIS). NQAIS is an online application based on the Hospital Inpatient Enquiry system (HIPE) operated by the national Health Service Executive in Ireland. Established in 1971, HIPE collects clinical and administrative data on discharges from acute Irish public hospitals. A HIPE record is created following a patient's discharge from a public hospital and offers demographic and clinical information for the episode of care. The current HIPE system only holds data for public hospitals and no national database is available on the activities in the private hospital sector. This analysis includes only patients treated in public hospitals regardless of their individual insurance status. We obtained records of all hospital episodes coded with laparoscopic appendectomy or open appendectomy as the primary procedure. From this sample we excluded episodes with primary diagnostic codes different from "Appendicitis", "Suspected appendicitis", or "Rule-out appendicitis" (i.e. not coded with K35-37 in the International Classification of Diseases Version 10 Clinical Modification (ICD-10-CM)), episodes coded as non-emergency admissions, and episodes for patients who are not residents in Ireland.

The Republic of Ireland is made up of 26 geographical subdivisions referred to as counties. These counties were used in this study to determine appendectomy rates per geographical area. County of residence is a variable in HIPE which can be utilised to determine residential status of individual persons irrespective of where the actual procedure was performed. We obtained population statistics from the 2016 census from the Central Statistical Office<sup>17</sup>.

Patient factors considered in the analysis were age, gender and county of residence. Children were categorized as patients aged 14 years or younger to correspond with the 5-year age groups in the

1  
2  
3 available census data. National age and gender stratification was derived from the population of  
4  
5 4,761,865 referred to in the 2016-population census<sup>17</sup>.  
6  
7

### 8 **Statistical analysis**

9  
10  
11 Data was analysed using Stata version 15.1 (StataCorp, Texas). Descriptive statistics were recorded  
12  
13 for patient characteristics and procedure type. Continuous variables were compared using unpaired  
14  
15 t-tests. Association of categorical variables (differences for dichotomous variables between groups)  
16  
17 was assessed using the chi-square ( $X^2$ ) test. Continuous numerical variables were reported as means  
18  
19 and standard deviations (SD). Categorical variables were reported as proportions or percentages.  
20  
21

22  
23 To assess relative variability we used methods described by McPhearson and colleagues<sup>12</sup>. These  
24  
25 established methods of geographic variation are widely used in small-area variation studies and  
26  
27 allow for context and comparison across geographical settings and countries<sup>13, 18, 19</sup>. The extremal  
28  
29 quotient (EQ) is presented as the ratio of the highest and lowest standardised county rate. A value  
30  
31 close to 1 indicates low variation in rates across counties. The coefficient of variation (CV) is a  
32  
33 measure of relative variability and is calculated as the standard deviation of the county rates divided  
34  
35 by the mean of county rates. A value greater than 0.3 is considered “highly variable” in accordance  
36  
37 to studies by McPhearson et al with higher scores indicating greater variability<sup>12, 20</sup>. The systematic  
38  
39 component of variation (SCV) is also a measure of variation. This is the difference between the  
40  
41 random component of variation and the total variation. Homogeneity in rates between areas would  
42  
43 result in a value of zero. A large SCV value indicates large systematic and regional variation<sup>12</sup>. We  
44  
45 estimated these variability measures for the whole population and for children and adults  
46  
47 separately.  
48  
49  
50

### 51 **Patient involvement**

52  
53 No patients were involved in setting the research question or the outcome measures, nor were they  
54  
55 involved in the development of design or implementation of the study. No patients were asked to  
56  
57 advise on interpretation or writing up of results.  
58  
59  
60

## Results

### National analysis

A total of 26,760 episodes of care discharged through January 1<sup>st</sup> 2014 to December 31<sup>st</sup> 2017 were extracted. In this sample 1902 episodes were coded with diagnoses other than K35-K37; 885 episodes were coded as non-emergency admissions; 289 episodes related to non-Ireland residents. After exclusion of these episodes, our study sample included 23,684 episodes of care of which 77.6% were laparoscopic appendectomies and 22.4% were open appendectomies. 53.7% of patients were male and the mean age was 25 years (SD 15, median 20, range 0-98). These findings are summarized in Table 1.

**Table 1** Number of adult and paediatric laparoscopic and open appendectomy

|                          | Laparoscopic (n (%)) | Open (n (%)) | Total (n (%)) | P value |
|--------------------------|----------------------|--------------|---------------|---------|
| <b>Children (n=7343)</b> |                      |              |               |         |
| Male                     | 2068 (49.1%)         | 2140 (50.9%) | 4208 (100%)   |         |
| Female                   | 1790 (57.1%)         | 1345 (42.9%) | 3135 (100%)   | <0.01   |
| <b>Adult (n=16341)</b>   |                      |              |               |         |
| Male                     | 7387 (86.8%)         | 1126 (13.2%) | 8513 (100%)   |         |
| Female                   | 7142 (91.2%)         | 686 (8.8%)   | 7828 (100%)   | <0.01   |

The percentage of laparoscopic procedures was 52.6% among children and 88.9% among adults (statistically significant difference; OR 7.2 95% CI 6.8-7.7). Figure 1 displays the proportion of appendectomies conducted as laparoscopic procedures for 2014 to 2017 in children and adult patients. The proportion of laparoscopic procedures increased steadily during the studied years from 2014 to 2017 from 72.7% to 83.3% (trend  $p < 0.01$ ). For children the proportion increased from 43.9% to 61.4% (trend  $p < 0.01$ ).

Girls were more likely to have laparoscopic procedures than boys (57.1% vs 49.1%, OR 1.4 95% CI 1.3-1.5), and women more likely than men (91.2% vs 86.8%, OR 1.6 95% CI 1.4-1.8). A clear age gradient was observed when comparing laparoscopic and open appendectomy procedures for the whole population and for both men and women separately (Figure 2) (OR 1.016, 95%CI 1.013;1.020). The proportion of patients undergoing laparoscopic procedures reduced for older patients in both

1  
2  
3 genders (logistic regression  $p < 0.01$ ) and appears statistically lower for patients older than 45 years  
4  
5 ( $p < 0.01$ ).  
6  
7

### 8 **County analysis**

9  
10 Figure 3 displays the number of laparoscopic and open procedures performed on children and adults  
11 during the years 2014 to 2017 by county of residence. The annual appendectomy rate was estimated  
12 at 124.4 procedures per 100,000 persons and 96.5 and 27.8 for laparoscopic and open approaches  
13 respectively. The online supplementary table shows the proportion of laparoscopic appendectomies  
14 per year by county of residence for the child and adult population. The data displays a gradual  
15 increase in the number of laparoscopic procedures performed in both patient groups during the 4-  
16 year study period.  
17  
18

19  
20 Figure 4 presents the ratio of the observed and expected number of the total appendectomy rates  
21 within different counties for both children and adults and displays the geographic dispersions  
22 determined. The expected number of procedures was estimated by relating the national age and  
23 gender procedure rate to the county population and demonstrates the inter-county discrepancies in  
24 a risk adjusted setting. A value of 1 was determined to be the national average rate to allow for  
25 comparison between geographic areas. The ratio takes a value larger than 1 when the numbers of  
26 observed procedures are higher than the expected number of procedures. This would indicate a high  
27 volume county when compared with the national average value. For children, 17/26 counties  
28 displayed a higher than average rate of appendectomy procedures. For the adult population,  
29 residents from 20/26 counties underwent appendectomy procedures at a higher rate than the  
30 national average.  
31  
32

33  
34 Figure 5 presents the association between the ratio of observed and expected procedures for  
35 children and adults. Counties in the north-east quadrant have a higher than expected number of  
36 procedures for both children and adults. These counties demonstrate higher rates of appendectomy  
37 procedures for their entire populations. There appears to be a strong association between the ratio  
38  
39  
40  
41  
42  
43  
44  
45  
46  
47  
48  
49  
50  
51  
52  
53  
54  
55  
56  
57  
58  
59  
60

1  
2  
3 for children and adults indicating that counties with a higher ratio for children also have a higher  
4  
5 ratio for adults. Counties in the south-west quadrant have a lower than expected number of  
6  
7 procedures for both children and adults. Using similar reasoning, counties with lower rates of  
8  
9 paediatric appendectomy procedures appeared to have low rates for the adult population also. Only  
10  
11 four counties have a different pattern. Roscommon is the only county where children have more  
12  
13 than the expected episodes of care and adults have fewer than the expected episodes of care, while  
14  
15 the reverse appears for Kilkenny, Waterford, Donegal and Kildare. These remaining four counties  
16  
17 display high rates in the adult population but lower than average rates in the paediatric patient  
18  
19 group.  
20  
21  
22

23  
24 Figure 6 displays the ratio of observed and expected procedures for laparoscopic and open  
25  
26 procedures for children and adults separately. Wide population dispersions are demonstrated in  
27  
28 children for both laparoscopic and open appendectomy. In 16/26 counties children underwent  
29  
30 laparoscopic appendectomy at rates higher than the national average, indicating areas with high  
31  
32 utilisation. Children from 13/26 counties underwent higher rates of open appendectomy procedures  
33  
34 than the rest of the general population. Similarly, adults in 16/26 counties had higher rates of  
35  
36 laparoscopic procedures than the rest of the national population, and adults from 12/26 counties  
37  
38 underwent higher rates of open appendectomy procedures. Wide dispersions are particularly  
39  
40 evident in the adult population with open appendectomy.  
41  
42  
43

44  
45 Table 2 displays the statistical measures of variation for the combined population and children and  
46  
47 adults separately. The extremal quotient was 8.3 for laparoscopic and 10.0 for open appendectomy,  
48  
49 demonstrating greater geographic variation for open appendectomy. The coefficient of variation was  
50  
51 high for both laparoscopic and open appendectomy; 36.7 for laparoscopic and 80.8 for open  
52  
53 procedures, in accordance with the McPhearson interpretations<sup>12</sup>. This demonstrates greater  
54  
55 geographic variability in the application of open appendectomy cases. The systematic component of  
56  
57 variation was also high for both procedures; 14.2 for laparoscopy and 124.8 for open appendectomy.  
58  
59  
60

**Table 2.** Variation statistics for laparoscopy, open and combined for children, adult and the whole patient population, 2014-2017.

| Population/procedure    | Number of episodes 2014-2017 | Standardised number of episodes per 100.000 population | Extremal Quotient | Coefficient of Variation | Systematic Component of Variation |
|-------------------------|------------------------------|--------------------------------------------------------|-------------------|--------------------------|-----------------------------------|
| <b>Children</b>         |                              |                                                        |                   |                          |                                   |
| Laparoscopy             | 3858                         | 383.3                                                  | 16.9              | 55.1                     | 41.6                              |
| Open                    | 3485                         | 346.2                                                  | 6.5               | 55.3                     | 38.2                              |
| Combined                | 7343                         | 729.5                                                  | 3.2               | 24.3                     | 9.3                               |
| <b>Adult</b>            |                              |                                                        |                   |                          |                                   |
| Laparoscopy             | 14529                        | 386.9                                                  | 7.1               | 33.3                     | 10.6                              |
| Open                    | 1812                         | 48.3                                                   | 25.7              | 128.4                    | 502.0                             |
| Combined                | 16341                        | 435.1                                                  | 2.1               | 18.9                     | 4.5                               |
| <b>Whole population</b> |                              |                                                        |                   |                          |                                   |
| Laparoscopy             | 18387                        | 386.1                                                  | 8.3               | 36.7                     | 14.2                              |
| Open                    | 5297                         | 111.2                                                  | 10.0              | 80.8                     | 124.8                             |
| Combined                | 23684                        | 497.4                                                  | 2.2               | 19.6                     | 5.6                               |

Extremal quotient =  $\max(\text{standardised episode rate } i) / \min(\text{standardised episode rate } i)$ .

Coefficient of variation =  $\text{standard deviation (standardised episode rate } i) / \text{mean (standardised episode rate } i) * 100$ .

Systematic component of variations =  $1/k ( \sum (O_i - E_i)^2 / E_i^2 - \sum 1/E_i ) * 100$  where k is number of counties,  $O_i$  is observed number of episodes and  $E_i$  is expected number of episodes determined by indirect standardisation.



## Discussion

This study documents a substantial geographic variation in the operative management of acute appendicitis in the Republic of Ireland. To our knowledge, there have been no population-based studies exploring emergency appendectomy variations at a county level in Ireland. While some level of disparity is to be expected, large variations particularly in emergency interventions can indicate potential inequity and inefficiency in the use of sophisticated healthcare systems, and thus indicate variations in access and use of surgical services. Similar to the Dartmouth Atlas project, our data demonstrates that a person's likelihood of undergoing a laparoscopic or open appendectomy is related to their county of residence<sup>9</sup>.

Laparoscopic appendectomy is favoured because of its benefits in analgesic requirements post-operatively, shorter length of hospital stay, lower post-operative mortality, and faster return to normal activities<sup>4, 7, 8, 21, 22</sup>. Unsurprisingly, most of the cases in our data were performed laparoscopically. As with most observational data, causality cannot be determined. Historical research suggests that the variations in the utility of surgical services may result from clinical uncertainty or heterogeneity in medical literature<sup>23, 24</sup>. One potential hypothetical and important reason for the variations could be individual surgeon skill and practice. The current study did not control for specific surgeon factors and may reflect a lack of laparoscopic skills or capacity in certain areas and explain the higher statistical variability for open procedures. Variations in laparoscopic surgery rates are not unheard of. An analyses by Doumouras et al suggested that laparoscopic training may influence the rate of laparoscopic practices in some hospitals<sup>25</sup>. While our study did not evaluate larger teaching hospitals separately, there may be an inherent geographic variation in laparoscopic expertise outside of tertiary referral centres and may also reflect variation in consultant and trainee surgeon performance as the principle operator; a factor not examined in this study.

In this study laparoscopic appendectomy utilisation appears lower in children and may indicate a deficiency in the paediatric surgery skillset available in the country and an unfamiliarity in operating on children amongst general surgeons. Multiple reports have stressed the need to provide high

1  
2  
3 quality paediatric surgery services to address the challenges and demands of paediatric patients  
4  
5 which may be unavailable in hospitals where adult surgery appears to dominate. The findings of this  
6  
7 study suggest a potential difference in expertise in relation to paediatric surgery in Ireland. This  
8  
9 would parallel with the reality that most district or general hospitals in Ireland lack a specialised  
10  
11 paediatric surgeon on site and thus cases are performed by adult surgeons. These findings suggest a  
12  
13 potential difference in expertise in relation to paediatric surgery in Ireland.  
14  
15

16  
17 There are some limitations to this study. As with other studies including data from administrative  
18  
19 databases, the reliability of results is based on the accuracy and completeness of systematic coding  
20  
21 and data input. We attempt to overcome potential miscoding information by including a large  
22  
23 population cohort of patients over a four-year period. We have not accounted for laparoscopic cases  
24  
25 that were converted to open due to the potential inclusion of duplicate numbers and inherent  
26  
27 miscoding errors. Co-morbidities, procedural complexity and socioeconomic status were also not  
28  
29 controlled for when assessing patient characteristics. However, despite these limitations our findings  
30  
31 demonstrate concerning conclusions relating to the provision of emergency appendectomy in the  
32  
33 Republic of Ireland for both children and adults. The analysis provides some important implications  
34  
35 for health care providers and surgeons in analysing the extent of geographic variation and the  
36  
37 disparity in management of a common condition. While we cannot explain the wide variations seen,  
38  
39 further analysis at an individual county level with the assessment of more in-depth patient  
40  
41 characteristics may uncover opportunities to eliminate variations and ultimately improve the  
42  
43 delivery of care and patient outcomes. We also await the results of the multi-institutional Right Iliac  
44  
45 Fossa Treatment (RIFT audit) study to further analyse the variation in the management strategies of  
46  
47 patients presenting with RIF pain to centres across the United Kingdom, Ireland, Italy, Portugal and  
48  
49 Spain<sup>26</sup>.  
50  
51  
52  
53  
54  
55  
56  
57  
58  
59  
60

## Conclusion

Geographic variation analyses can help characterise the overall performance of a health system and determine whether patients receive equal treatment for equal needs. This is the first Irish study to systematically explore the rates and geographical disparity of acute laparoscopic and open appendectomy procedures and help bridge a pre-existing knowledge gap on the topic. The high appendectomy rates seen in several counties in this study may suggest an imbalance in the provision of a common acute surgical procedure in the Republic of Ireland. Some populations appear more likely to undergo laparoscopic procedures than other populations with considerable geographical disparity observed within a relatively small country. Large statistical variability in the paediatric population may also reflect a discrepancy in surgical paediatric care in areas where these procedures are largely performed by surgeons specialising in adult care. Based on these results, we recommend future studies to focus on the practicality of this and further analysis into the structure of emergency paediatric surgery particularly in district hospitals. Despite the limitations, our study suggests a need for more effective decision-making and planning to ensure consistency and decrease the variability in the management of acute appendicitis.

1  
2  
3 **Contributors:** OA conceived and designed the study, analysed the data and drafted and revised the  
4 paper. JS designed the study, prepared and analysed the data, drafted and revised the paper. KM  
5 interpreted the results and revised the paper. All authors had full access to all the data (including  
6 statistical reports and tables) in the study and can take responsibility for the integrity of the data and  
7 the accuracy of the data analysis. OA is the guarantor and affirms that the manuscript is an honest,  
8 accurate, and transparent account of the study being reported; that no important aspects of the  
9 study have been omitted; and that any discrepancies from the study as originally planned (and, if  
10 relevant, registered) have been explained.  
11  
12  
13  
14  
15  
16  
17  
18  
19  
20

21 **Funding:** This research received no specific grant from any funding agency in the public, commercial  
22 or not-for-profit sectors.  
23  
24  
25

26 **Competing interests:** All authors declare no conflicts in interests in the preparation of this study and  
27 declare: no support from any organisation for the submitted work; no financial relationships with  
28 any organisations that might have an interest in the submitted work in the previous three years; no  
29 other relationships or activities that could appear to have influenced the submitted work.  
30  
31  
32  
33  
34  
35

36 **Ethical approval:** Ethics board approval was not required for the study.  
37  
38

39 **Data sharing:** All data has been included either in the main manuscript or as a supplementary file.  
40 The authors do not withhold any other data.  
41  
42  
43

#### 44 **Acknowledgments**

45  
46  
47 The authors acknowledge the Healthcare Pricing Office as the source of HIPE (Hospital In-Patient  
48 Enquiry) data which is utilised in NQAIS Clinical. The authors also acknowledge the Clinical Leads of  
49 the National Clinical Programme in Surgery, the NQAIS Clinical Steering Group, the HORC-NCP  
50 research group, and the Acute Hospital Division (HSE) for providing access to NQAIS Clinical.  
51  
52  
53  
54  
55  
56  
57  
58  
59  
60

## References

1. Ferris M, Quan S, Kaplan BS, Molodecky N, Ball CG, Chernoff GW, et al. The Global Incidence of Appendicitis: A Systematic Review of Population-based Studies. *Annals of surgery* 2017;**266**(2): 237-241.
2. Kaplan GG, Dixon E, Panaccione R, Fong A, Chen L, Szyszkowicz M, et al. Effect of ambient air pollution on the incidence of appendicitis. *Canadian Medical Association Journal* 2009;**181**(9): 591-597.
3. Kaplan GG, Tanyingoh D, Dixon E, Johnson M, Wheeler AJ, Myers RP, et al. Ambient ozone concentrations and the risk of perforated and nonperforated appendicitis: a multicity case-crossover study. *Environmental health perspectives* 2013;**121**(8): 939.
4. Tate JJT, Dawson JW, Chung SCS, Lau WY, Li AKC. Laparoscopic versus open appendectomy: prospective randomised trial. *The Lancet* 1993;**342**(8872): 633-637.
5. Southgate E, Vousden N, Karthikesalingam A, Markar SR, Black S, Zaidi A. Laparoscopic vs open appendectomy in older patients. *Archives of Surgery* 2012;**147**(6): 557-562.
6. Adwan H, Weerasuriya CK, Endleman P, Barnes A, Stewart L, Justin T. Laparoscopic versus open appendectomy in children: A UK District General Hospital experience. *Journal of Pediatric Surgery* 2014;**49**(2): 277-279.
7. Thomson J-E, Kruger D, Jann-Kruger C, Kiss A, Omoshoro-Jones J, Luvhengo T, et al. Laparoscopic versus open surgery for complicated appendicitis: a randomized controlled trial to prove safety. *Surgical endoscopy* 2015;**29**(7): 2027-2032.
8. Tiwari MM, Reynoso JF, Tsang AW, Oleynikov D. Comparison of outcomes of laparoscopic and open appendectomy in management of uncomplicated and complicated appendicitis. *Annals of surgery* 2011;**254**(6): 927-932.
9. Practice TDloHPaC. The Dartmouth Atlas Project Database. 1996 - 2010.
10. Reames BN, Shubeck SP, Birkmeyer JD. Strategies for Reducing Regional Variation in the Use of Surgery A Systematic Review. *Annals of surgery* 2014;**259**(4): 616.
11. Ahmed O, Mealy K, Kelliher G, Keane F, Sorensen J. Exploring geographical variation in access to general surgery in Ireland: Evidence from a national study. *The Surgeon* 2019.
12. McPherson K, Wennberg JE, Hovind OB, Clifford P. Small-area variations in the use of common surgical procedures: an international comparison of New England, England, and Norway. *New England journal of medicine* 1982;**307**(21): 1310-1314.
13. Weeks WB, Paraponaris A, Ventelou B. Geographic variation in rates of common surgical procedures in France in 2008–2010, and comparison to the US and Britain. *Health Policy* 2014;**118**(2): 215-221.
14. Katsuno G, Nagakari K, Yoshikawa S, Sugiyama K, Fukunaga M. Laparoscopic Appendectomy for Complicated Appendicitis: A Comparison with Open Appendectomy. *World Journal of Surgery* 2009;**33**(2): 208-214.
15. Masoomi H, Mills S, Dolich MO, Ketana N, Carmichael JC, Nguyen NT, et al. Comparison of Outcomes of Laparoscopic Versus Open Appendectomy in Adults: Data from the Nationwide Inpatient Sample (NIS), 2006–2008. *Journal of Gastrointestinal Surgery* 2011;**15**(12): 2226-2231.
16. Litz CN, Ciesla DJ, Danielson PD, Chandler NM. Effect of hospital type on the treatment of acute appendicitis in teenagers. *Journal of Pediatric Surgery* 2018;**53**(3): 446-448.
17. Scoreboard MIP. Central Statistics Office statistical release. In: June; 2015.
18. Appleby J, Raleigh V, Frosini F, Bevan G, Gao H, Lyscom T. *Variations in health care: the good, the bad and the inexplicable*. King's Fund, 2011.
19. Birkmeyer JD, Reames BN, McCulloch P, Carr AJ, Campbell WB, Wennberg JE. Understanding of regional variation in the use of surgery. *The Lancet* 2013;**382**(9898): 1121-1129.
20. Chassin MR, Brook RH, Park RE, Keesey J, Fink A, Kosecoff J, et al. *Variations in the use of medical and surgical services by the Medicare population*. Rand, 1986.

- 1  
2  
3 21. Sauerland S, Jaschinski T, Neugebauer EAM. Laparoscopic versus open surgery for suspected  
4 appendicitis. *Cochrane Database of Systematic Reviews* 2010(10).  
5  
6 22. Faiz O, Clark J, Brown T, Bottle A, Antoniou A, Farrands P, et al. Traditional and laparoscopic  
7 appendectomy in adults: outcomes in English NHS hospitals between 1996 and 2006. *Annals of*  
8 *surgery* 2008;**248**(5): 800-806.  
9  
10 23. Ray-Coquard I, Philip T, Lehmann M, Fervers B, Farsi F, Chauvin F. Impact of a clinical  
11 guidelines program for breast and colon cancer in a French cancer center. *Jama* 1997;**278**(19): 1591-  
12 1595.  
13  
14 24. Wennberg JE. Dealing with medical practice variations: a proposal for action. *Health Affairs*  
15 1984;**3**(2): 6-33.  
16  
17 25. Doumouras AG, Saleh F, Eskicioglu C, Amin N, Cadeddu M, Hong D. Neighborhood variation  
18 in the utilization of laparoscopy for the treatment of colon cancer. *Diseases of the Colon & Rectum*  
19 2016;**59**(8): 781-788.  
20  
21 26. Right Iliac Fossa Pain Treatment (RIFT) Study: protocol for an international, multicentre,  
22 prospective observational study. *BMJ open* 2018;**8**(1): e017574.  
23  
24  
25  
26  
27  
28  
29  
30  
31  
32  
33  
34  
35  
36  
37  
38  
39  
40  
41  
42  
43  
44  
45  
46  
47  
48  
49  
50  
51  
52  
53  
54  
55  
56  
57  
58  
59  
60

1  
2  
3 **Figure legend:**  
4

5 **Figure 1** - Proportion of appendectomies conducted as laparoscopic procedures during 2014-2017 in  
6  
7 children and adult patients  
8

9  
10 **Figure 2** – Age and gender distribution for laparoscopic and open appendectomy.  
11

12  
13 **Figure 3** – Number of procedures performed during 2014-2017 on county residents  
14

15  
16 **Figure 4** - Ratio of observed/expected number of episodes of appendectomy by county for children  
17  
18 and adults.  
19

20  
21 **Figure 5** - Association between children and adult's ratio of observed/expected number of episodes  
22  
23 of appendectomy by county.  
24

25  
26 **Figure 6** - Ratio of observed/expected number of episodes of laparoscopy and open appendectomy  
27  
28 by county for children and adults.  
29

30  
31 **Table 1** – Adult and paediatric laparoscopic and open appendectomy percentage rates..  
32

33  
34 **Table 2** – Variation statistics for laparoscopy, open and combined for children, adult and the whole  
35  
36 patient population, 2014-2017.  
37

38  
39 **Online supplementary table** – Proportion of laparoscopic appendectomies per year by county of  
40  
41 residence for child and adult population.  
42  
43  
44  
45  
46  
47  
48  
49  
50  
51  
52  
53  
54  
55  
56  
57  
58  
59  
60

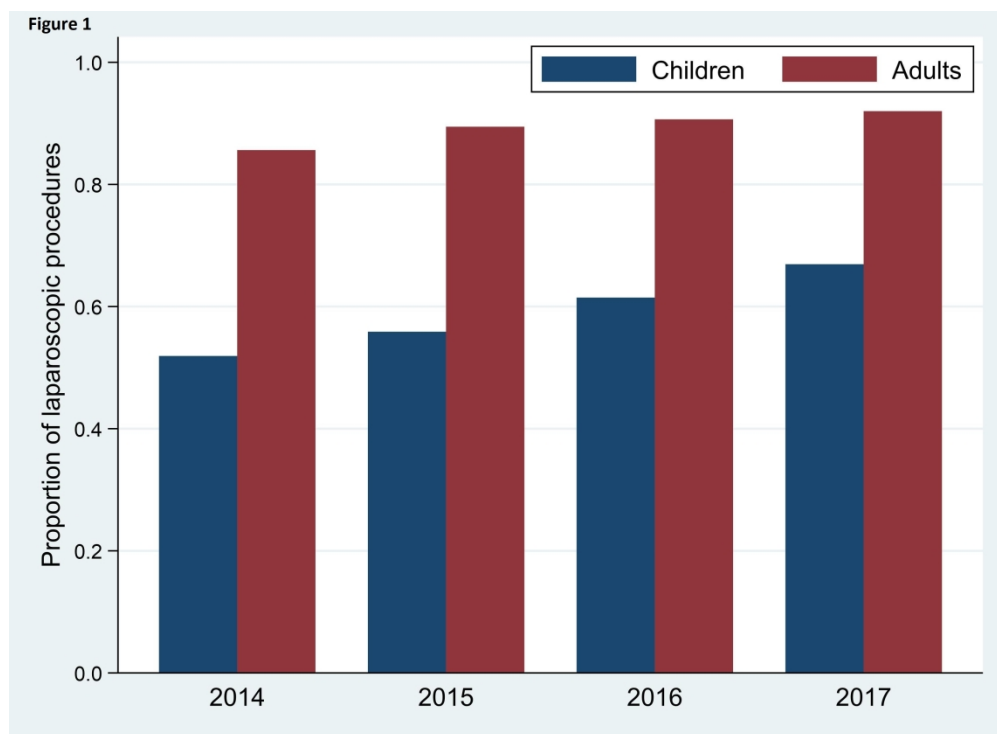

Proportion of appendectomies conducted as laparoscopic procedures during 2014-2017 in children and adult patients

279x203mm (300 x 300 DPI)



1  
2  
3  
4  
5  
6  
7  
8  
9  
10  
11  
12  
13  
14  
15  
16  
17  
18  
19  
20  
21  
22  
23  
24  
25  
26  
27  
28  
29  
30  
31  
32  
33  
34  
35  
36  
37  
38  
39  
40  
41  
42  
43  
44  
45  
46  
47  
48  
49  
50  
51  
52  
53  
54  
55  
56  
57  
58  
59  
60

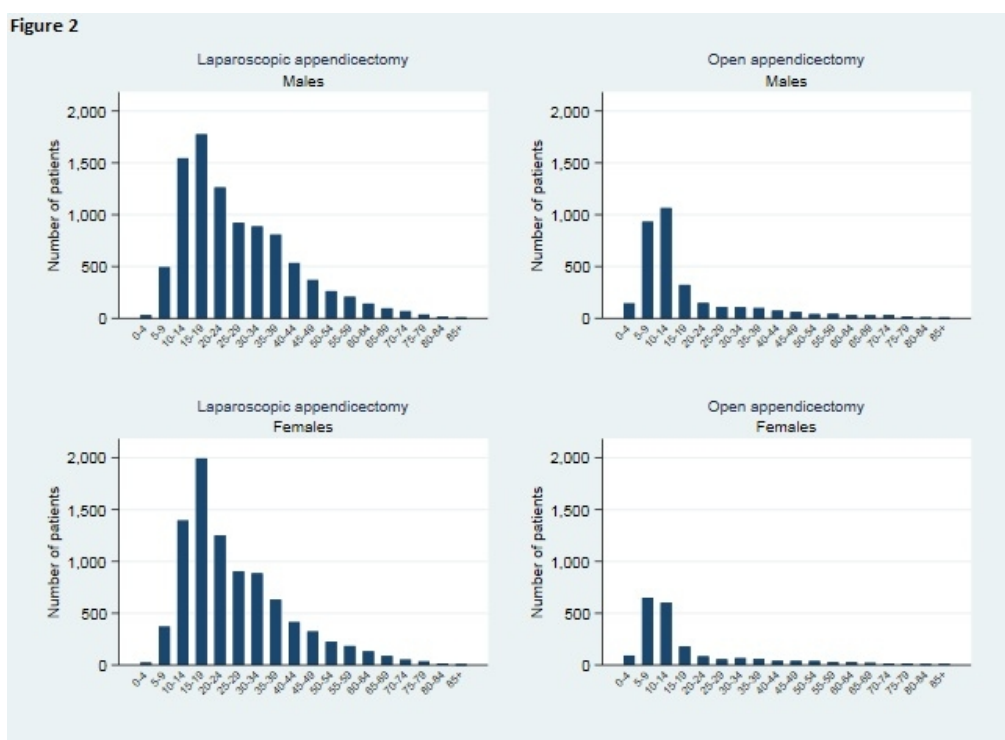

Age and gender distribution for laparoscopic and open appendectomy.

169x123mm (96 x 96 DPI)

1  
2  
3  
4  
5  
6  
7  
8  
9  
10  
11  
12  
13  
14  
15  
16  
17  
18  
19  
20  
21  
22  
23  
24  
25  
26  
27  
28  
29  
30  
31  
32  
33  
34  
35  
36  
37  
38  
39  
40  
41  
42  
43  
44  
45  
46  
47  
48  
49  
50  
51  
52  
53  
54  
55  
56  
57  
58  
59  
60

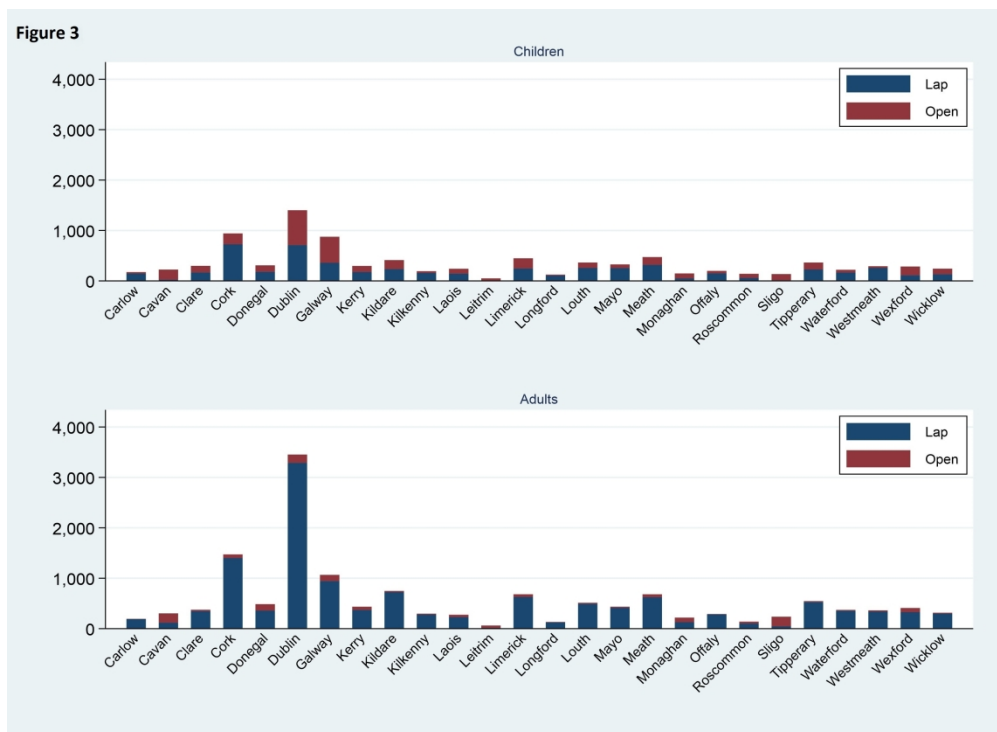

Number of procedures performed during 2014-2017 on county residents

279x203mm (300 x 300 DPI)

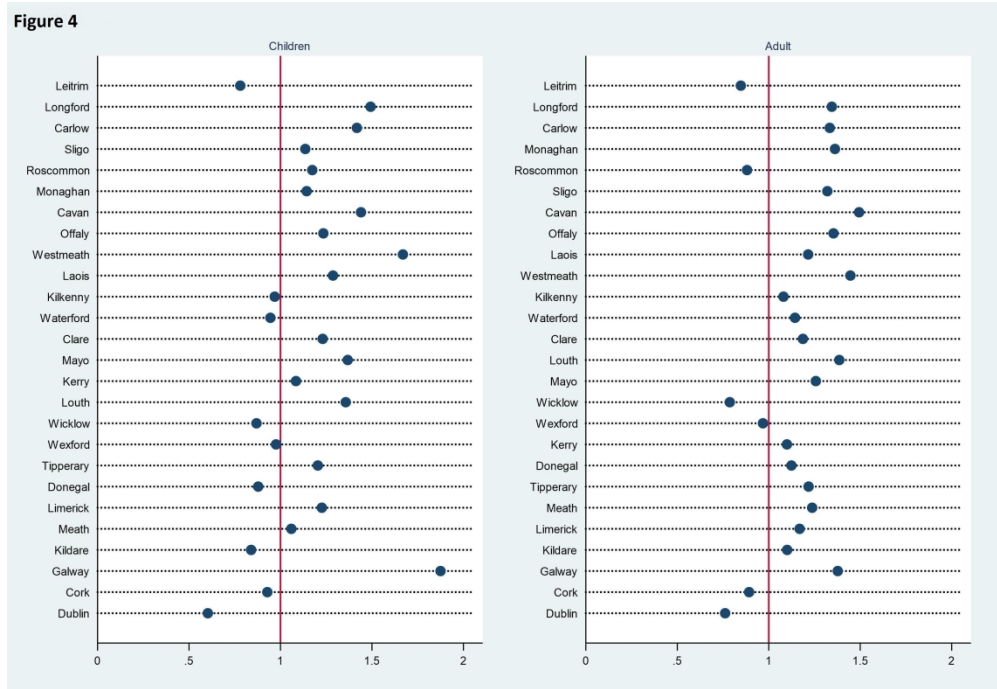

Ratio of observed/expected number of episodes of appendectomy by county for children and adults.

276x190mm (300 x 300 DPI)

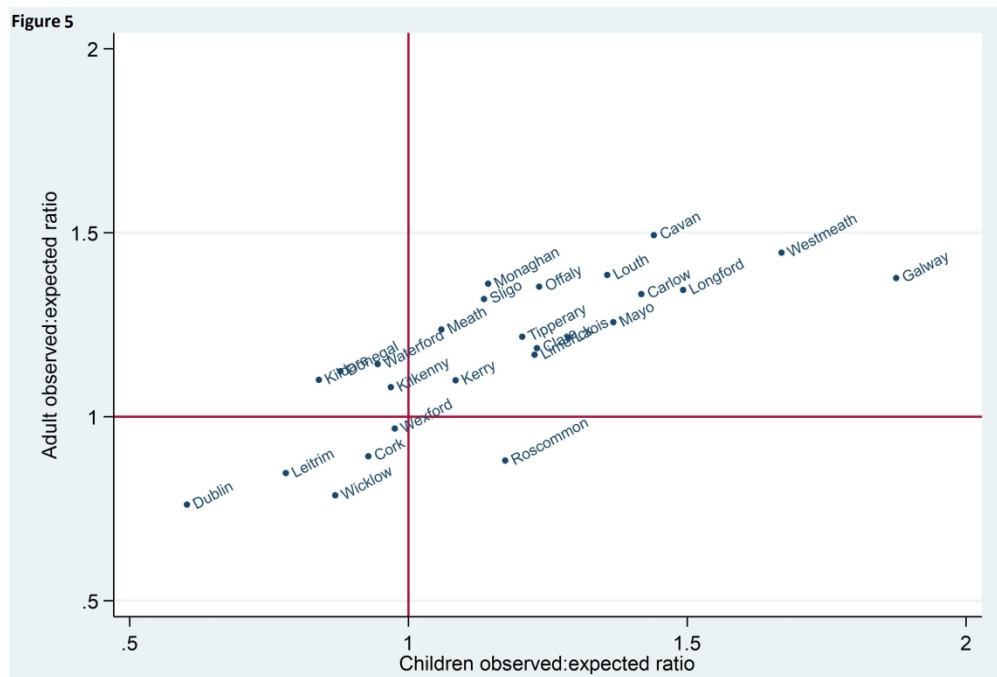

Association between children and adult's ratio of observed/expected number of episodes of appendectomy by county.

279x188mm (300 x 300 DPI)

1  
2  
3  
4  
5  
6  
7  
8  
9  
10  
11  
12  
13  
14  
15  
16  
17  
18  
19  
20  
21  
22  
23  
24  
25  
26  
27  
28  
29  
30  
31  
32  
33  
34  
35  
36  
37  
38  
39  
40  
41  
42  
43  
44  
45  
46  
47  
48  
49  
50  
51  
52  
53  
54  
55  
56  
57  
58  
59  
60

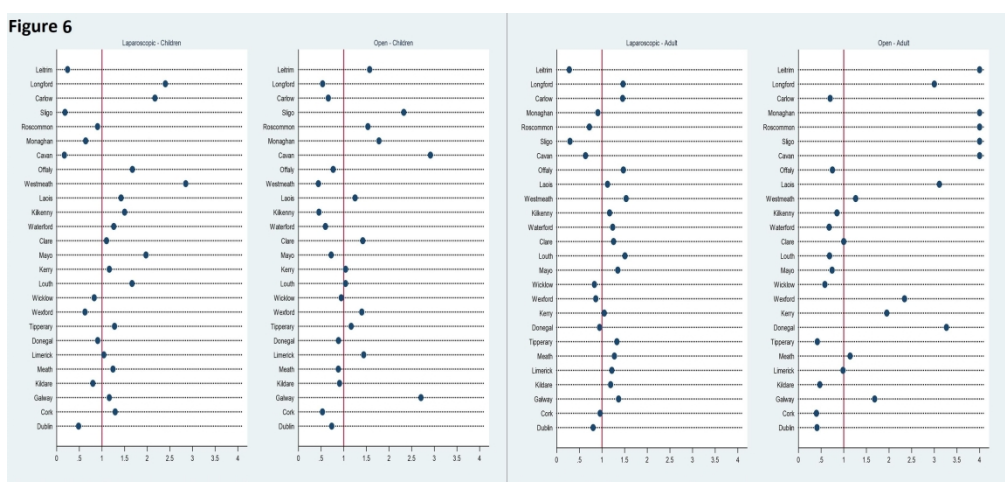

Ratio of observed/expected number of episodes of laparoscopy and open appendectomy by county for children and adults.

279x131mm (300 x 300 DPI)

**Online Supplementary Table** Proportion of laparoscopic appendectomies per year by county of residence for child and adult population

| Proportion of laparoscopic procedures |          |      |      |      |        |      |      |       |
|---------------------------------------|----------|------|------|------|--------|------|------|-------|
|                                       | Children |      |      |      | Adults |      |      |       |
| County                                | 2014     | 2015 | 2016 | 2017 | 2014   | 2015 | 2016 | 2017  |
| Carlow                                | 0.74     | 0.91 | 0.84 | 0.90 | 0.90   | 0.98 | 0.96 | 1.0   |
| Cavan                                 | 0.11     | 0.14 | 0.08 | 0.13 | 0.22   | 0.51 | 0.44 | 0.5   |
| Clare                                 | 0.56     | 0.43 | 0.59 | 0.65 | 0.90   | 0.94 | 0.88 | 0.97  |
| Cork                                  | 0.65     | 0.76 | 0.8  | 0.87 | 0.93   | 0.96 | 0.97 | 0.95  |
| Donegal                               | 0.25     | 0.46 | 0.77 | 0.89 | 0.54   | 0.73 | 0.78 | 0.86  |
| Dublin                                | 0.44     | 0.42 | 0.54 | 0.64 | 0.93   | 0.96 | 0.96 | 0.96  |
| Galway                                | 0.39     | 0.41 | 0.38 | 0.47 | 0.86   | 0.89 | 0.89 | 0.90  |
| Kerry                                 | 0.46     | 0.66 | 0.71 | 0.60 | 0.80   | 0.85 | 0.92 | 0.90  |
| Kildare                               | 0.49     | 0.62 | 0.64 | 0.56 | 0.97   | 0.97 | 0.98 | 0.98  |
| Kilkenny                              | 0.75     | 0.84 | 0.82 | 0.89 | 0.89   | 0.93 | 0.95 | 0.99  |
| Laois                                 | 0.47     | 0.45 | 0.64 | 0.81 | 0.80   | 0.78 | 0.79 | 0.96  |
| Leitrim                               | 0.14     | 0.27 | 0.11 | 0.22 | 0.27   | 0.15 | 0.33 | 0.46  |
| Limerick                              | 0.44     | 0.50 | 0.54 | 0.70 | 0.89   | 0.93 | 0.90 | 0.95  |
| Longford                              | 0.70     | 0.97 | 0.90 | 0.93 | 0.90   | 0.93 | 0.92 | 0.92  |
| Louth                                 | 0.66     | 0.61 | 0.78 | 0.77 | 0.96   | 0.97 | 0.93 | 0.96  |
| Mayo                                  | 0.73     | 0.83 | 0.78 | 0.79 | 0.94   | 0.94 | 0.98 | 0.94  |
| Meath                                 | 0.59     | 0.61 | 0.74 | 0.75 | 0.89   | 0.91 | 0.94 | 0.93  |
| Monaghan                              | 0.35     | 0.30 | 0.33 | 0.41 | 0.59   | 0.51 | 0.77 | 0.51  |
| Offaly                                | 0.65     | 0.78 | 0.83 | 0.78 | 0.94   | 0.98 | 1.00 | 0.95  |
| Roscommon                             | 0.42     | 0.39 | 0.50 | 0.47 | 0.69   | 0.68 | 0.75 | 0.865 |
| Sligo                                 | 0.12     | 0.1  | 0.09 | 0.19 | 0.18   | 0.19 | 0.20 | 0.19  |
| Tipperary                             | 0.63     | 0.68 | 0.60 | 0.60 | 0.94   | 0.98 | 0.98 | 0.98  |
| Waterford                             | 0.75     | 0.80 | 0.77 | 0.74 | 0.92   | 0.94 | 0.98 | 0.96  |
| Westmeath                             | 0.86     | 0.84 | 0.92 | 0.92 | 0.89   | 0.96 | 0.96 | 0.97  |
| Wexford                               | 0.25     | 0.19 | 0.53 | 0.52 | 0.68   | 0.67 | 0.82 | 0.93  |
| Wicklow                               | 0.67     | 0.61 | 0.50 | 0.40 | 0.98   | 0.90 | 0.94 | 0.97  |

**STROBE 2007 (v4) Statement—Checklist of items that should be included in reports of cohort studies**

| Section/Topic             | Item # | Recommendation                                                                                                                                                                       | Reported on page # |
|---------------------------|--------|--------------------------------------------------------------------------------------------------------------------------------------------------------------------------------------|--------------------|
| <b>Title and abstract</b> | 1      | (a) Indicate the study’s design with a commonly used term in the title or the abstract                                                                                               | 1                  |
|                           |        | (b) Provide in the abstract an informative and balanced summary of what was done and what was found                                                                                  | 3                  |
| <b>Introduction</b>       |        |                                                                                                                                                                                      |                    |
| Background/rationale      | 2      | Explain the scientific background and rationale for the investigation being reported                                                                                                 | 4                  |
| Objectives                | 3      | State specific objectives, including any prespecified hypotheses                                                                                                                     | 4                  |
| <b>Methods</b>            |        |                                                                                                                                                                                      |                    |
| Study design              | 4      | Present key elements of study design early in the paper                                                                                                                              | 5                  |
| Setting                   | 5      | Describe the setting, locations, and relevant dates, including periods of recruitment, exposure, follow-up, and data collection                                                      | 5                  |
| Participants              | 6      | (a) Give the eligibility criteria, and the sources and methods of selection of participants. Describe methods of follow-up                                                           | 5                  |
|                           |        | (b) For matched studies, give matching criteria and number of exposed and unexposed                                                                                                  | 5                  |
| Variables                 | 7      | Clearly define all outcomes, exposures, predictors, potential confounders, and effect modifiers. Give diagnostic criteria, if applicable                                             | 5                  |
| Data sources/ measurement | 8*     | For each variable of interest, give sources of data and details of methods of assessment (measurement). Describe comparability of assessment methods if there is more than one group | 5                  |
| Bias                      | 9      | Describe any efforts to address potential sources of bias                                                                                                                            | 5                  |
| Study size                | 10     | Explain how the study size was arrived at                                                                                                                                            | 5                  |
| Quantitative variables    | 11     | Explain how quantitative variables were handled in the analyses. If applicable, describe which groupings were chosen and why                                                         | 5                  |
| Statistical methods       | 12     | (a) Describe all statistical methods, including those used to control for confounding                                                                                                | 6                  |
|                           |        | (b) Describe any methods used to examine subgroups and interactions                                                                                                                  | 6                  |
|                           |        | (c) Explain how missing data were addressed                                                                                                                                          | n/a                |
|                           |        | (d) If applicable, explain how loss to follow-up was addressed                                                                                                                       | n/a                |
|                           |        | (e) Describe any sensitivity analyses                                                                                                                                                | n/a                |
| <b>Results</b>            |        |                                                                                                                                                                                      |                    |

|                          |     |                                                                                                                                                                                                              |            |
|--------------------------|-----|--------------------------------------------------------------------------------------------------------------------------------------------------------------------------------------------------------------|------------|
| Participants             | 13* | (a) Report numbers of individuals at each stage of study—eg numbers potentially eligible, examined for eligibility, confirmed eligible, included in the study, completing follow-up, and analysed            | 7          |
|                          |     | (b) Give reasons for non-participation at each stage                                                                                                                                                         | n/a        |
|                          |     | (c) Consider use of a flow diagram                                                                                                                                                                           | n/a        |
| Descriptive data         | 14* | (a) Give characteristics of study participants (eg demographic, clinical, social) and information on exposures and potential confounders                                                                     | 7          |
|                          |     | (b) Indicate number of participants with missing data for each variable of interest                                                                                                                          | n/a        |
|                          |     | (c) Summarise follow-up time (eg, average and total amount)                                                                                                                                                  | n/a        |
| Outcome data             | 15* | Report numbers of outcome events or summary measures over time                                                                                                                                               | 7,8,9,10,  |
| Main results             | 16  | (a) Give unadjusted estimates and, if applicable, confounder-adjusted estimates and their precision (eg, 95% confidence interval). Make clear which confounders were adjusted for and why they were included | 8,9, 10    |
|                          |     | (b) Report category boundaries when continuous variables were categorized                                                                                                                                    | 8, 9       |
|                          |     | (c) If relevant, consider translating estimates of relative risk into absolute risk for a meaningful time period                                                                                             | n/a        |
| Other analyses           | 17  | Report other analyses done—eg analyses of subgroups and interactions, and sensitivity analyses                                                                                                               | 8,9,10,    |
| <b>Discussion</b>        |     |                                                                                                                                                                                                              |            |
| Key results              | 18  | Summarise key results with reference to study objectives                                                                                                                                                     | 11, 12,13, |
| <b>Limitations</b>       |     |                                                                                                                                                                                                              |            |
| Interpretation           | 20  | Give a cautious overall interpretation of results considering objectives, limitations, multiplicity of analyses, results from similar studies, and other relevant evidence                                   | 12         |
| Generalisability         | 21  | Discuss the generalisability (external validity) of the study results                                                                                                                                        | 12         |
| <b>Other information</b> |     |                                                                                                                                                                                                              |            |
| Funding                  | 22  | Give the source of funding and the role of the funders for the present study and, if applicable, for the original study on which the present article is based                                                | 14         |

\*Give information separately for cases and controls in case-control studies and, if applicable, for exposed and unexposed groups in cohort and cross-sectional studies.

**Note:** An Explanation and Elaboration article discusses each checklist item and gives methodological background and published examples of transparent reporting. The STROBE checklist is best used in conjunction with this article (freely available on the Web sites of PLoS Medicine at <http://www.plosmedicine.org/>, Annals of Internal Medicine at <http://www.annals.org/>, and Epidemiology at <http://www.epidem.com/>). Information on the STROBE Initiative is available at [www.strobe-statement.org](http://www.strobe-statement.org).
