# Supplementary material for: Exploring geographic variation in acute appendectomy in Ireland: results from a national registry study
Source: PubMed Central journal article supplement — BMJ Open. 2019 Aug 22;9(8):e025231. doi: 10.1136/bmjopen-2018-025231 (PMC6707658; doi:10.1136/bmjopen-2018-025231), 2019-08-22
Supplement: bmjopen-2018-025231supp001.pdf [file bmjopen-2018-025231supp001.pdf]

**Online Supplementary Table** Proportion of laparoscopic appendectomies per year by county of residence for child and adult population

| Proportion of laparoscopic procedures |          |      |      |      |        |      |      |       |
|---------------------------------------|----------|------|------|------|--------|------|------|-------|
| County                                | Children |      |      |      | Adults |      |      |       |
|                                       | 2014     | 2015 | 2016 | 2017 | 2014   | 2015 | 2016 | 2017  |
| Carlow                                | 0.74     | 0.91 | 0.84 | 0.90 | 0.90   | 0.98 | 0.96 | 1.0   |
| Cavan                                 | 0.11     | 0.14 | 0.08 | 0.13 | 0.22   | 0.51 | 0.44 | 0.5   |
| Clare                                 | 0.56     | 0.43 | 0.59 | 0.65 | 0.90   | 0.94 | 0.88 | 0.97  |
| Cork                                  | 0.65     | 0.76 | 0.8  | 0.87 | 0.93   | 0.96 | 0.97 | 0.95  |
| Donegal                               | 0.25     | 0.46 | 0.77 | 0.89 | 0.54   | 0.73 | 0.78 | 0.86  |
| Dublin                                | 0.44     | 0.42 | 0.54 | 0.64 | 0.93   | 0.96 | 0.96 | 0.96  |
| Galway                                | 0.39     | 0.41 | 0.38 | 0.47 | 0.86   | 0.89 | 0.89 | 0.90  |
| Kerry                                 | 0.46     | 0.66 | 0.71 | 0.60 | 0.80   | 0.85 | 0.92 | 0.90  |
| Kildare                               | 0.49     | 0.62 | 0.64 | 0.56 | 0.97   | 0.97 | 0.98 | 0.98  |
| Kilkenny                              | 0.75     | 0.84 | 0.82 | 0.89 | 0.89   | 0.93 | 0.95 | 0.99  |
| Laois                                 | 0.47     | 0.45 | 0.64 | 0.81 | 0.80   | 0.78 | 0.79 | 0.96  |
| Leitrim                               | 0.14     | 0.27 | 0.11 | 0.22 | 0.27   | 0.15 | 0.33 | 0.46  |
| Limerick                              | 0.44     | 0.50 | 0.54 | 0.70 | 0.89   | 0.93 | 0.90 | 0.95  |
| Longford                              | 0.70     | 0.97 | 0.90 | 0.93 | 0.90   | 0.93 | 0.92 | 0.92  |
| Louth                                 | 0.66     | 0.61 | 0.78 | 0.77 | 0.96   | 0.97 | 0.93 | 0.96  |
| Mayo                                  | 0.73     | 0.83 | 0.78 | 0.79 | 0.94   | 0.94 | 0.98 | 0.94  |
| Meath                                 | 0.59     | 0.61 | 0.74 | 0.75 | 0.89   | 0.91 | 0.94 | 0.93  |
| Monaghan                              | 0.35     | 0.30 | 0.33 | 0.41 | 0.59   | 0.51 | 0.77 | 0.51  |
| Offaly                                | 0.65     | 0.78 | 0.83 | 0.78 | 0.94   | 0.98 | 1.00 | 0.95  |
| Roscommon                             | 0.42     | 0.39 | 0.50 | 0.47 | 0.69   | 0.68 | 0.75 | 0.865 |
| Sligo                                 | 0.12     | 0.1  | 0.09 | 0.19 | 0.18   | 0.19 | 0.20 | 0.19  |
| Tipperary                             | 0.63     | 0.68 | 0.60 | 0.60 | 0.94   | 0.98 | 0.98 | 0.98  |
| Waterford                             | 0.75     | 0.80 | 0.77 | 0.74 | 0.92   | 0.94 | 0.98 | 0.96  |
| Westmeath                             | 0.86     | 0.84 | 0.92 | 0.92 | 0.89   | 0.96 | 0.96 | 0.97  |
| Wexford                               | 0.25     | 0.19 | 0.53 | 0.52 | 0.68   | 0.67 | 0.82 | 0.93  |
| Wicklow                               | 0.67     | 0.61 | 0.50 | 0.40 | 0.98   | 0.90 | 0.94 | 0.97  |
